# Supplementary material for: Erasable labeling of neuronal activity using a reversible calcium marker
Source: eLife. 2020 Sep 15;9:e57249. doi: 10.7554/eLife.57249 (PMC7492087; doi:10.7554/eLife.57249)
Supplement: Figure 1—figure supplement 8—source data 1. [file elife-57249-fig1-figsupp8-data1.xlsx]

## Sheet: Sheet1
Figure 1 - figure supplement 8b	fluorescence intensity (AU)
	500 nm (11 mW/cm2)
	Time (s)	+ EGTA				+ Ca2+
	0	28795	26587	28606	28373	16094	15752	15347	15924
	10	28734	26777	28872	28577	13337	13264	12362	13132
	20					11161	11469	9979	11146
	60	25630	24131	26034	26032	6057	6828	4354	5743
	120					2832	2762	1822	2088
	200	19216	19640	19736	20654	1148	1203	866	924
	420	11366	13412	12443	14237
	900	4435	5999	4313	6326
	1200	2931	3561	2902	4114
	1500	2604	3124	2049	2856
	490 nm (19 mW/cm2)
	Time (s)	+ EGTA				+ Ca2+
	0	28512	28327	28824	28750	15806	15245	15505	15397
	5					11297	11874	11438	12109
	10					8966	9749	8677	9839
	20	26773	26872	26879	27144	6501	7043	6082	7058
	60	23173	23946	23238	23785	964	1505	999	1660
	120	18867	20276	18614	20181	474	615	444	596
	200	14771	16651	14214	16123
	300	11282	13595	9761	12132
	420	7984	9999	6544	8438
	600	4752	6524	3806	5376
	900	2202	3854	1809	2760
	480 nm (51 mW/cm2)
	Time (s)	+ EGTA				+ Ca2+
	0	29527	28838	28771	28720	17201	17000	16621	16670
	5					8277	9579	8372	10290
	10	26838	26438	26481	26761	4772	6181	4426	7113
	20					1624	2523	1501	2437
	40					639	805	591	857
	60	18604	20401	18267	21119
	120	12320	15009	11863	15640
	200	7598	9664	7713	10501
	300	4371	6428	4481	7093
	420	3075	4626	2737	4313
	600	1823	3099	1699	2662
	470 nm (141 mW/cm2)
	Time (s)	+ EGTA				+ Ca2+
	0	32189	32056	29974	30454	17723	17384	16488	15961
	1					12074	12423	11364	12418
	2					8652	9269	8620	10342
	5					2862	4364	3193	5825
	10					1101	1730	1279	2330
	20	24605	25829	22949	24477	708	806	723	1006
	60	15685	18244	14990	16961
	120	11633	13909	9884	12363
	200	9184	10181	7560	9293
	300	7760	8032	6855	7501
	420	7053	7260	6382	6879
	460 nm (241 mW/cm2)
	Time (s)	+ EGTA				+ Ca2+
	0	30112	30139	28755	27376	16986	16796	17379	16744
	0.5					12987	12571	13025	13163
	1					10233	9984	10608	10601
	2					6374	6631	6680	7393
	5					2528	2727	2684	3215
	10	25761	25789	25050	23858	1472	1652	1522	1801
	20	23535	24250	22508	22053	1329	1349	1319	1308
	60	18915	20296	18253	18000
	120	17629	18356	17077	16883
	200	16706	16894	16208	15522
	300	15961	16014	15386	14784
	420	15071	15325	14787	14130
	450 nm (110 mW/cm2)
	Time (s)	+ EGTA				+ Ca2+
	0	31976	31317	29582	28419	18330	16354	17723	17720
	0.5					15986	14422	15672	15917
	1					15020	13479	14306	14700
	2					12646	11730	11788	12678
	5					9182	8205	8132	8637
	10					6607	6100	5666	6245
	20	31879	31140	29261	27976	5110	4711	4702	4879
	60	30866	30362	28521	27316	4848	4293	4477	4432
	120	30173	29679	27780	26541
	200	29585	29269	27145	26102
	300	29549	29131	26984	26094
