# Supplementary material for: Erasable labeling of neuronal activity using a reversible calcium marker
Source: eLife. 2020 Sep 15;9:e57249. doi: 10.7554/eLife.57249 (PMC7492087; doi:10.7554/eLife.57249)
Supplement: Figure 1—figure supplement 8—source data 2. [file elife-57249-fig1-figsupp8-data2.xlsx]

## Sheet: Sheet1
Figure 1 - figure supplement 8c
	Wavelength (nm)	+Ca/-Ca downswitching rate ratio				maximum ΔF
	450	25.0138	23.8031	28.9933	24.4032	0.037146	0.0488184	0.123357	0.147885
	460	22.7222	22.518	22.1617	19.2634	0.431179	0.430933	0.447924	0.472426
	470	26.2579	21.9727	24.1719	15.1616	0.747602	0.753694	0.784738	0.766332
	480	21.3079	16.4152	20.7144	13.6865	0.934056	0.909937	0.939319	0.942456
	490	15.7957	13.1084	16.4307	13.1544	0.960431	0.937651	0.970122	0.965731
	500	9.13954	7.59526	11.678	9.20515	0.948679	0.975314	0.983654	0.978174
