# Supplementary material for: Erasable labeling of neuronal activity using a reversible calcium marker
Source: eLife. 2020 Sep 15;9:e57249. doi: 10.7554/eLife.57249 (PMC7492087; doi:10.7554/eLife.57249)
Supplement: Figure 1—figure supplement 8—source data 3. [file elife-57249-fig1-figsupp8-data3.xlsx]

## Sheet: Sheet1
Figure 1 - figure supplement 8d
	Time (s)	normalized fluorescence intensity (AU)
	0	0.0156685	0.0168784	0.015245	0.0168179
	1	0.0488808	0.0482154	0.0419238	0.045856
	5	0.152208	0.142347	0.122384	0.117907
	20	0.355354	0.339625	0.311131	0.275439
	60	0.553781	0.543799	0.505082	0.479613
	120	0.568784	0.560678	0.52922	0.518028
