# Supplementary material for: Erasable labeling of neuronal activity using a reversible calcium marker
Source: eLife. 2020 Sep 15;9:e57249. doi: 10.7554/eLife.57249 (PMC7492087; doi:10.7554/eLife.57249)
Supplement: Figure 1—figure supplement 9—source data 1. [file elife-57249-fig1-figsupp9-data1.xlsx]

## Sheet: Sheet1
Figure 1 - figure supplement 9	off-switching rate (s-1)
		- Ca2+		+ Ca2+
	light power (mW/cm2)	#1	#2	#1	#2
	11.89	0.001361	0.0007033	0.02553	0.02045
	52.04	0.007584	0.005382	0.124	0.0959
	101.19	0.01296	0.008715	0.2472	0.1764
	130.57	0.01408	0.01462	0.2992	0.2196
	167.9	0.02409	0.02323	0.4195	0.2899
	208.55	0.03278	0.01589	0.5091	0.3772
