# Supplementary material for: Erasable labeling of neuronal activity using a reversible calcium marker
Source: eLife. 2020 Sep 15;9:e57249. doi: 10.7554/eLife.57249 (PMC7492087; doi:10.7554/eLife.57249)
Supplement: Figure 1—source data 1. [file elife-57249-fig1-data1.xlsx]

## Sheet: Sheet1
Figure 1c
		normalized fluorescence intensity (AU)
		-Ca replicates				+Ca replicates
	Time (s)	#1	#2	#3	#4	#1	#2	#3	#4
	0	0.991503	1.0168	0.989631	1.00207	1.05011	1.01397	0.981316	0.954602
	0.5	0.960236	0.984508	0.9596	0.971436	0.799724	0.801825	0.749478	0.765146
	1	0.95854	0.982459	0.955466	0.966949	0.645626	0.666156	0.57515	0.636141
	2	0.931654	0.953877	0.921903	0.934586	0.393139	0.443024	0.334909	0.422193
	5	0.868802	0.897066	0.854458	0.882404	0.101751	0.13837	0.0896853	0.155418
	10	0.738469	0.788391	0.723701	0.776449	0.0384794	0.0506656	0.0334369	0.0507857
	20	0.567118	0.630854	0.535569	0.602413	0.0225114	0.0250326	0.0206504	0.0249726
