# Supplementary material for: Erasable labeling of neuronal activity using a reversible calcium marker
Source: eLife. 2020 Sep 15;9:e57249. doi: 10.7554/eLife.57249 (PMC7492087; doi:10.7554/eLife.57249)
Supplement: Figure 1—source data 2. [file elife-57249-fig1-data2.xlsx]

## Sheet: Sheet1
Figure 1d
		normalized fluorescence intensity (AU)
		-Ca replicates				+Ca replicates
	Time (s)	#1	#2	#3	#4	#1	#2	#3	#4
	0	0.0126473	0.0130052	0.0127666	0.012528	0.00914495	0.00888366	0.00914495	0.00809981
	0.1	0.376435	0.33384	0.362356	0.35484	0.519956	0.491998	0.452283	0.477366
	0.2	0.60528	0.557673	0.590962	0.577957	0.771311	0.763734	0.688484	0.716964
	0.5	0.940194	0.917763	0.921104	0.912394	1.05559	1.07466	0.951597	0.955255
	1	1.00594	1.00546	1.00462	0.983982	1.07231	1.0872	0.988438	0.980338
	2	1.00689	1.01381	1.01047	0.982789	1.04488	1.05245	0.951858	0.950813
