# Supplementary material for: Erasable labeling of neuronal activity using a reversible calcium marker
Source: eLife. 2020 Sep 15;9:e57249. doi: 10.7554/eLife.57249 (PMC7492087; doi:10.7554/eLife.57249)
Supplement: Figure 1—source data 3. [file elife-57249-fig1-data3.xlsx]

## Sheet: Sheet1
Figure 1f
		relative fluorescence intensity (AU)				relative off-switching rate
	[Ca2+] (M)	#1	#2	#3	#4	#1	#2	#3	#4
	Control	0.991503	1.0168	0.989631	1.00207	1.01462	0.920143	1.11658	0.943672
	5.51491e-09	1.00214	0.994577	1.00373	0.99546	1.14189	0.946524	1.02816	0.834581
	1.73682e-08	0.977053	0.93766	1.0345	1.00903	1.09483	1.02959	0.905526	0.982175
	5.31099e-08	0.994683	1.00956	0.998392	0.977583	1.1697	1.01889	1.01604	0.931907
	9.03562e-08	1.00825	0.985179	1.00938	0.996025	1.86738	1.58788	1.67558	1.45561
	1.57327e-07	0.80655	0.806762	0.811638	0.814499	7.42246	6.06774	6.12834	5.24064
	2.70587e-07	0.677737	0.69844	0.684379	0.652688	15.5116	11.5579	16.7843	11.8182
	4.89976e-07	0.608666	0.628239	0.594534	0.593015	19.0339	12.7807	20.3601	13.8182
	8.8375e-07	0.627745	0.631737	0.603367	0.597997	16.5526	12.6738	19.3012	14.1248
	3.52808e-06	0.633115	0.625342	0.588246	0.595736	15.1658	12.3066	20.1925	14.7201
	1.91929e-05	0.618029	0.59676	0.577541	0.561819	17.8039	15.016	19.3654	14.3458
