# Supplementary material for: Erasable labeling of neuronal activity using a reversible calcium marker
Source: eLife. 2020 Sep 15;9:e57249. doi: 10.7554/eLife.57249 (PMC7492087; doi:10.7554/eLife.57249)
Supplement: Figure 2—figure supplement 1—source data 1. [file elife-57249-fig2-figsupp1-data1.xlsx]

## Sheet: Sheet1
Figure 2 - figure supplement 1b	green-to-red ratio (AU)
	Time (s)	with stimulation															without stimulation
	0.1	1.05898	0.963703	1.02983	1.08883	0.921396	1.03281	0.949688	1.06333	0.879213	0.92671	0.974956	1.19075	1.02315	1.05118	0.84547	1.05064	0.940786	1.02669	1.06966	0.880574	1.01874	0.927312	1.06595	0.897288	0.941046	0.980371	1.20986	1.07137	1.06353	0.856189
	0.2	1.05452	0.961353	1.03049	1.08468	0.921314	1.03167	0.950344	1.05686	0.873486	0.922338	0.967523	1.18566	1.01483	1.03987	0.839718	1.04564	0.938446	1.02402	1.06522	0.877944	1.01132	0.931285	1.06375	0.891389	0.943643	0.977624	1.20298	1.06529	1.06192	0.854254
	0.3	1.05201	0.958268	1.03025	1.07712	0.912923	1.02399	0.949812	1.05474	0.873921	0.920385	0.967775	1.18161	1.01075	1.03751	0.838824	1.04207	0.936276	1.02179	1.05858	0.873531	1.01382	0.926847	1.05918	0.894915	0.93726	0.971679	1.20082	1.06534	1.05229	0.853955
	0.4	1.04927	0.956171	1.01999	1.075	0.910271	1.02255	0.941798	1.04817	0.875184	0.91893	0.964471	1.17775	1.00717	1.03608	0.835609	1.03816	0.935926	1.01358	1.05452	0.868045	1.0041	0.918041	1.05471	0.891351	0.937992	0.967864	1.19495	1.05871	1.04892	0.849325
	0.5	1.04501	0.950857	1.02266	1.06937	0.905342	1.01406	0.937485	1.04164	0.870869	0.913118	0.958672	1.17249	1.00862	1.02987	0.836706	1.03409	0.924186	1.00938	1.0506	0.868248	1.0005	0.920078	1.05083	0.88481	0.930507	0.966992	1.1903	1.04798	1.04557	0.850018
	0.6	1.03827	0.944511	1.01447	1.06355	0.901815	1.01243	0.936056	1.04117	0.8667	0.913104	0.955548	1.16812	0.997605	1.02995	0.832298	1.02943	0.926348	1.0066	1.0479	0.86216	1.00174	0.912046	1.04738	0.88537	0.930915	0.961821	1.18679	1.05058	1.04301	0.844874
	0.7	1.03492	0.945141	1.01193	1.05971	0.900084	1.0097	0.933189	1.03832	0.866825	0.909685	0.951468	1.16381	0.998049	1.02679	0.829892	1.02621	0.92029	1.00587	1.04431	0.859967	0.996649	0.908859	1.04496	0.884035	0.925254	0.955982	1.18251	1.04308	1.03882	0.840933
	0.8	1.03324	0.939531	1.00563	1.05892	0.89583	1.00725	0.931642	1.03525	0.86191	0.90539	0.948274	1.16079	0.990608	1.01933	0.825743	1.02165	0.916928	0.996371	1.03983	0.853989	0.988016	0.907341	1.03784	0.881933	0.924679	0.954351	1.18023	1.04152	1.03934	0.839442
	0.9	1.02521	0.93779	1.00433	1.05511	0.89222	1.00304	0.925629	1.03076	0.863596	0.90348	0.946094	1.15762	0.98902	1.02253	0.827824	1.01771	0.915416	0.994806	1.03534	0.853453	0.988856	0.904146	1.03584	0.874444	0.919113	0.952823	1.17507	1.03781	1.03447	0.835524
	1	1.02444	0.932551	1.00177	1.04885	0.890395	1.00561	0.926029	1.0234	0.857329	0.899606	0.943629	1.15284	0.984329	1.01871	0.82542	1.01674	0.913226	0.988829	1.03271	0.851269	0.982956	0.900496	1.03071	0.881309	0.918995	0.948561	1.17017	1.02987	1.03038	0.833955
	1.1	1.01984	0.928527	0.996774	1.04484	0.887029	0.998436	0.917946	1.02048	0.859864	0.895459	0.940125	1.14843	0.977169	1.01597	0.821702	1.0133	0.910244	0.987531	1.0264	0.847384	0.979518	0.901585	1.02752	0.872576	0.915901	0.945135	1.1687	1.02854	1.02783	0.833955
	1.2	1.01819	0.927207	0.998069	1.04308	0.885812	0.995876	0.917209	1.01728	0.854499	0.894612	0.935294	1.14633	0.974506	1.01298	0.819826	1.01034	0.904726	0.984544	1.02444	0.844477	0.976564	0.894392	1.02459	0.875681	0.912203	0.943246	1.16274	1.02338	1.02338	0.834082
	1.3	1.01533	0.922626	0.992085	1.03873	0.880795	0.988382	0.91092	1.0144	0.858551	0.893845	0.931961	1.14313	0.973522	1.00951	0.817548	1.00566	0.901605	0.979731	1.02167	0.84212	0.978692	0.887092	1.01873	0.869621	0.907178	0.937732	1.16109	1.02351	1.01899	0.826596
	1.4	1.01006	0.9221	0.984364	1.03581	0.878662	0.989664	0.908203	1.01099	0.848685	0.891822	0.927225	1.13798	0.970929	1.0013	0.817751	1.00325	0.899376	0.97686	1.01462	0.839879	0.973496	0.889198	1.01664	0.866689	0.905958	0.934845	1.15481	1.0158	1.01564	0.822537
	1.5	1.00883	0.91698	0.981168	1.03254	0.875935	0.98534	0.905543	1.00939	0.853778	0.8906	0.925012	1.13483	0.97209	1.01041	0.810473	0.996987	0.895887	0.973881	1.01434	0.837731	0.967863	0.886291	1.01312	0.867294	0.903543	0.931805	1.15175	1.01663	1.0174	0.825063
	1.6	1.0029	0.914833	0.976273	1.03037	0.872106	0.979974	0.90357	1.00265	0.844864	0.886463	0.919001	1.13256	0.969358	1.00432	0.809346	0.995455	0.891982	0.969915	1.01069	0.834316	0.963273	0.883063	1.00799	0.86531	0.901662	0.930824	1.14785	1.01581	1.01358	0.820279
	1.7	0.999496	0.908161	0.975024	1.02434	0.870845	0.976676	0.901873	1.00106	0.843902	0.880345	0.921407	1.12648	0.964697	0.994897	0.805344	0.992506	0.889534	0.970913	1.00609	0.831483	0.957427	0.878683	1.00576	0.865292	0.896823	0.925541	1.14332	1.01165	1.00772	0.819099
	1.8	0.995922	0.908058	0.971658	1.02162	0.864947	0.972781	0.899097	0.993451	0.846255	0.87968	0.915409	1.12355	0.956529	0.996344	0.801474	0.987072	0.890182	0.965674	1.00324	0.826569	0.956673	0.877755	0.9986	0.864001	0.896112	0.922737	1.13962	1.00563	1.01055	0.817119
	1.9	0.993199	0.906956	0.972272	1.01811	0.863294	0.969492	0.896422	0.988661	0.846427	0.877145	0.911714	1.1205	0.9582	0.992333	0.804013	0.986336	0.883618	0.961281	0.99962	0.824225	0.951319	0.874886	0.996418	0.863544	0.892527	0.920662	1.13606	1.00577	1.00257	0.817859
	2	0.985933	0.895483	0.945753	1.00723	0.854958	0.920825	0.883885	0.980907	0.836602	0.868836	0.90711	1.11362	0.949869	0.984787	0.796886	0.982454	0.878821	0.95951	0.997782	0.821536	0.947958	0.874708	0.992491	0.86294	0.889786	0.915117	1.13341	0.997295	1.00376	0.812981
	2.1	0.977372	0.84686	0.876898	0.982948	0.837418	0.832238	0.830642	0.965761	0.82283	0.836867	0.897205	1.10087	0.918315	0.948982	0.76809	0.975802	0.881959	0.955461	0.991834	0.820396	0.946567	0.869165	0.98813	0.857482	0.887482	0.914712	1.12906	0.994239	0.998761	0.810869
	2.2	0.963211	0.787103	0.836827	0.950121	0.818599	0.784453	0.773413	0.951936	0.808596	0.814147	0.888362	1.08831	0.885056	0.902376	0.740719	0.973249	0.878163	0.952551	0.989284	0.817948	0.939285	0.866154	0.985494	0.85522	0.885809	0.908964	1.12627	0.991907	0.997186	0.812212
	2.3	0.948961	0.736797	0.814626	0.916273	0.804028	0.750371	0.726753	0.941414	0.791932	0.790138	0.881161	1.07351	0.865643	0.843396	0.719116	0.970121	0.873224	0.952939	0.983178	0.814298	0.94045	0.863613	0.984263	0.852331	0.883297	0.905323	1.12335	0.987565	1.00006	0.810022
	2.4	0.930582	0.698929	0.804029	0.88215	0.790348	0.719088	0.685201	0.928836	0.78415	0.773204	0.868849	1.05864	0.838394	0.79608	0.695579	0.969629	0.874007	0.950219	0.980245	0.812198	0.936773	0.864437	0.979422	0.855335	0.882325	0.90309	1.11974	0.985467	0.99264	0.804966
	2.5	0.914097	0.665954	0.79017	0.847409	0.777772	0.691448	0.645704	0.920794	0.766947	0.760555	0.858639	1.04183	0.812278	0.749162	0.67972	0.965166	0.865569	0.944836	0.976307	0.810873	0.931672	0.858742	0.976846	0.851736	0.876107	0.899067	1.11566	0.981704	0.990279	0.803342
	2.6	0.896876	0.635129	0.780417	0.810621	0.762192	0.660407	0.614733	0.909887	0.754553	0.745299	0.848135	1.02499	0.789092	0.713239	0.663335	0.961155	0.860319	0.943455	0.975842	0.804931	0.933963	0.853123	0.974021	0.850986	0.873816	0.896764	1.11187	0.98603	0.98801	0.802416
	2.7	0.873496	0.608125	0.768369	0.776496	0.746465	0.640847	0.588196	0.902548	0.741876	0.732125	0.837233	1.00907	0.768115	0.679956	0.650426	0.956921	0.859366	0.941376	0.970924	0.802702	0.932978	0.848983	0.968213	0.848992	0.873266	0.896401	1.10857	0.975007	0.983651	0.800628
	2.8	0.854258	0.582979	0.761971	0.741339	0.732035	0.618372	0.558625	0.893023	0.726943	0.715987	0.82763	0.989518	0.748686	0.651036	0.634859	0.95662	0.858768	0.931711	0.967681	0.802	0.930462	0.853195	0.966077	0.846391	0.870419	0.892482	1.10752	0.97112	0.981851	0.798418
	2.9	0.832743	0.558624	0.757933	0.7077	0.718511	0.595208	0.534601	0.884842	0.714839	0.704268	0.815886	0.971398	0.723452	0.628644	0.621804	0.952853	0.856546	0.933901	0.963332	0.80021	0.920117	0.846467	0.962419	0.84526	0.865657	0.888369	1.10099	0.971626	0.97581	0.793808
	3	0.811239	0.538593	0.752929	0.673299	0.706799	0.575072	0.512631	0.874988	0.702699	0.69041	0.804304	0.95308	0.703876	0.609424	0.604247	0.951193	0.852694	0.934121	0.961499	0.797271	0.91952	0.840787	0.958706	0.839399	0.864893	0.884778	1.09701	0.962468	0.975093	0.79719
	3.1	0.788969	0.516926	0.743351	0.641516	0.696	0.556484	0.493526	0.86937	0.687119	0.67611	0.791264	0.933117	0.682188	0.59328	0.59295	0.94514	0.854502	0.932484	0.959473	0.795586	0.909405	0.842741	0.955559	0.838862	0.863802	0.882458	1.09347	0.966422	0.974902	0.792904
	3.2	0.767383	0.498719	0.733702	0.611682	0.686494	0.545287	0.476723	0.860988	0.675382	0.664398	0.781375	0.913182	0.662042	0.573371	0.578137	0.942193	0.848035	0.926051	0.956204	0.792138	0.913706	0.837321	0.952325	0.839858	0.861238	0.877816	1.09335	0.964278	0.969902	0.790106
	3.3	0.745073	0.481976	0.727052	0.583393	0.677166	0.521259	0.457509	0.856774	0.659643	0.6527	0.769083	0.891268	0.640991	0.559233	0.568852	0.941958	0.845517	0.922709	0.953355	0.787788	0.910584	0.839246	0.94901	0.834518	0.858743	0.876587	1.0887	0.953824	0.964872	0.783023
	3.4	0.721125	0.464147	0.720539	0.55744	0.669574	0.512842	0.444637	0.849838	0.646885	0.641426	0.754072	0.871393	0.627301	0.544801	0.554174	0.934895	0.845962	0.916353	0.947782	0.785256	0.906189	0.834055	0.946749	0.83445	0.854679	0.87198	1.08431	0.951204	0.962046	0.786209
	3.5	0.696938	0.451028	0.714812	0.532476	0.660402	0.491658	0.428275	0.843894	0.632424	0.630215	0.74266	0.851784	0.611793	0.533351	0.542255	0.934349	0.840975	0.915648	0.946197	0.781263	0.901617	0.83083	0.941438	0.83668	0.853593	0.869706	1.08051	0.952681	0.962767	0.783649
	3.6	0.674866	0.437971	0.706834	0.507033	0.653218	0.483659	0.414253	0.837695	0.621048	0.616542	0.728933	0.831759	0.595444	0.516166	0.52874	0.931601	0.835267	0.910778	0.944571	0.781763	0.901703	0.832218	0.938882	0.832762	0.851547	0.868626	1.07675	0.952688	0.961543	0.781565
	3.7	0.650646	0.422968	0.703468	0.483563	0.64741	0.471792	0.403707	0.835582	0.610053	0.605735	0.718737	0.809801	0.583195	0.504746	0.518099	0.928581	0.838466	0.909084	0.938224	0.779559	0.900601	0.826546	0.934886	0.832479	0.848463	0.864658	1.07324	0.946389	0.958644	0.780857
	3.8	0.629371	0.413055	0.701605	0.463205	0.637798	0.461036	0.392238	0.828117	0.593889	0.593691	0.70478	0.791664	0.570269	0.492335	0.506359	0.924709	0.833373	0.905967	0.935178	0.77601	0.893535	0.823705	0.933343	0.825662	0.84932	0.860302	1.071	0.945692	0.952733	0.778714
	3.9	0.606549	0.400115	0.692775	0.444379	0.631669	0.448646	0.38236	0.824426	0.58442	0.58204	0.69246	0.768501	0.561224	0.484793	0.495616	0.921005	0.830268	0.905057	0.932229	0.776422	0.891994	0.821141	0.929811	0.824904	0.842018	0.858495	1.06742	0.938726	0.950319	0.779035
	4	0.584149	0.389435	0.686634	0.426381	0.625846	0.438948	0.371821	0.818561	0.569535	0.571015	0.680702	0.750387	0.547871	0.475533	0.484539	0.918074	0.828315	0.900884	0.929344	0.771326	0.893458	0.820226	0.926794	0.824112	0.84352	0.857023	1.06445	0.937754	0.954266	0.772948
	4.1	0.567021	0.379517	0.68203	0.411799	0.622857	0.428884	0.359539	0.817334	0.561652	0.563096	0.67233	0.734562	0.539579	0.461402	0.475174	0.914823	0.826028	0.899033	0.925882	0.770256	0.883727	0.815955	0.923737	0.826346	0.839352	0.855053	1.06031	0.934993	0.943156	0.773061
	4.2	0.555196	0.371666	0.680231	0.397407	0.617803	0.427188	0.35245	0.811864	0.554572	0.559079	0.662998	0.722061	0.529466	0.45858	0.471979	0.912176	0.82174	0.90023	0.923101	0.767369	0.886176	0.812562	0.920813	0.822123	0.839628	0.85102	1.05736	0.930688	0.943992	0.772846
	4.3	0.541649	0.364769	0.677251	0.38638	0.612448	0.420723	0.347736	0.810576	0.549556	0.553402	0.654592	0.710388	0.525602	0.446591	0.46581	0.908885	0.822976	0.896247	0.921669	0.762802	0.882851	0.811428	0.917794	0.820505	0.835443	0.848064	1.05382	0.929418	0.939392	0.767058
	4.4	0.53029	0.359335	0.671126	0.374378	0.60805	0.413058	0.33747	0.805056	0.545468	0.549385	0.647589	0.698797	0.51345	0.444005	0.46139	0.90803	0.81635	0.894707	0.918977	0.759746	0.873815	0.806303	0.915575	0.817857	0.833	0.844018	1.05242	0.930916	0.94263	0.766598
	4.5	0.521304	0.351146	0.667161	0.363367	0.605723	0.411353	0.334829	0.80151	0.536789	0.544541	0.640813	0.68734	0.508696	0.434757	0.455556	0.901987	0.816429	0.891244	0.913068	0.758811	0.877881	0.80427	0.912479	0.817352	0.830723	0.84478	1.04788	0.922857	0.937993	0.765565
	4.6	0.508597	0.346085	0.659637	0.354595	0.602513	0.40635	0.325591	0.798787	0.53321	0.539734	0.634468	0.676847	0.503604	0.430275	0.452018	0.90208	0.814094	0.887168	0.911185	0.758276	0.872234	0.802574	0.908527	0.81202	0.828717	0.84278	1.0455	0.919272	0.93625	0.76188
	4.7	0.500359	0.34085	0.663269	0.347049	0.597938	0.400884	0.321726	0.796028	0.527158	0.536612	0.629824	0.668201	0.498139	0.424434	0.44435	0.898439	0.813008	0.886007	0.908539	0.752551	0.873188	0.800292	0.906579	0.813859	0.826128	0.838979	1.04327	0.921896	0.931063	0.764696
	4.8	0.493124	0.334993	0.656704	0.337581	0.594794	0.398396	0.316182	0.792672	0.523789	0.533065	0.622967	0.658784	0.494742	0.420902	0.445202	0.894758	0.809139	0.879879	0.904522	0.752388	0.871015	0.80018	0.903943	0.812923	0.825354	0.835765	1.03856	0.915369	0.929896	0.760982
	4.9	0.486216	0.331066	0.653749	0.331589	0.593413	0.396975	0.314384	0.791766	0.52305	0.529059	0.61852	0.651261	0.489921	0.414617	0.444822	0.891851	0.807029	0.876741	0.900369	0.750296	0.863231	0.796073	0.898301	0.812707	0.82303	0.833518	1.03375	0.914534	0.927921	0.758675
	5	0.478108	0.328428	0.651097	0.324712	0.590248	0.397654	0.3097	0.786721	0.515759	0.526656	0.612663	0.642784	0.484709	0.41025	0.437571	0.889435	0.807796	0.879571	0.897359	0.748443	0.865363	0.796281	0.897693	0.808897	0.818474	0.829577	1.03347	0.908547	0.9281	0.755961
	5.1	0.472723	0.324594	0.647684	0.319482	0.58621	0.393448	0.302684	0.783816	0.512787	0.522782	0.608142	0.635729	0.479327	0.408089	0.433887	0.887801	0.805634	0.872814	0.899197	0.745519	0.861419	0.792008	0.893354	0.804717	0.818704	0.828483	1.02916	0.907284	0.923401	0.756472
	5.2	0.468091	0.320847	0.645403	0.312929	0.582613	0.392404	0.299637	0.778873	0.509178	0.52115	0.603818	0.628225	0.478459	0.404906	0.43239	0.885226	0.798927	0.871182	0.891168	0.742525	0.858379	0.788371	0.888538	0.805193	0.818228	0.825804	1.02667	0.906546	0.919511	0.752376
	5.3	0.461971	0.317412	0.642554	0.307113	0.581443	0.389647	0.295813	0.777625	0.505212	0.516114	0.601616	0.621673	0.473741	0.402377	0.42891	0.881465	0.797009	0.870531	0.890478	0.740595	0.856446	0.791054	0.885052	0.800754	0.814711	0.822652	1.02475	0.901876	0.921487	0.74986
	5.4	0.4527	0.313233	0.638917	0.30391	0.579145	0.3845	0.295625	0.774266	0.502862	0.514936	0.596704	0.615192	0.472137	0.398234	0.430876	0.879484	0.79205	0.86555	0.889314	0.739853	0.853342	0.785179	0.885886	0.80263	0.812745	0.82055	1.01917	0.901062	0.916163	0.749831
	5.5	0.45071	0.310224	0.639777	0.298447	0.576488	0.384802	0.29235	0.769996	0.500389	0.513384	0.592176	0.608645	0.466221	0.397125	0.42848	0.876592	0.7936	0.863572	0.882465	0.735149	0.854873	0.783859	0.882992	0.803851	0.809024	0.8205	1.01724	0.895071	0.913955	0.750156
	5.6	0.444352	0.311506	0.63396	0.294922	0.573867	0.386866	0.288227	0.769387	0.498326	0.512859	0.588278	0.603231	0.464336	0.39237	0.423555	0.871263	0.788209	0.863286	0.881719	0.734252	0.849741	0.782111	0.875934	0.80103	0.805159	0.814226	1.01538	0.89366	0.913378	0.746808
	5.7	0.441458	0.306955	0.63067	0.291286	0.570976	0.380906	0.285767	0.7652	0.493885	0.508824	0.586817	0.596666	0.463075	0.390615	0.422895	0.869141	0.788355	0.856982	0.878349	0.732115	0.853405	0.776968	0.876701	0.798715	0.806391	0.81185	1.01163	0.893503	0.912471	0.742947
	5.8	0.436373	0.305802	0.629649	0.287486	0.569943	0.381486	0.286646	0.763941	0.492127	0.508265	0.58248	0.591763	0.460776	0.38883	0.421287	0.868364	0.787462	0.855351	0.874833	0.727967	0.848725	0.774379	0.87323	0.794062	0.804227	0.810573	1.00941	0.889519	0.91016	0.740573
	5.9	0.434421	0.30413	0.629147	0.285073	0.56613	0.378593	0.283825	0.76008	0.489415	0.505066	0.57985	0.586912	0.457883	0.388686	0.415958	0.865265	0.782853	0.855268	0.872964	0.725852	0.843037	0.773362	0.868988	0.79117	0.800235	0.806752	1.00626	0.888778	0.907078	0.738773
	6	0.430261	0.301285	0.62508	0.281833	0.565276	0.377932	0.278585	0.758809	0.484699	0.502767	0.575756	0.58271	0.457432	0.385374	0.416765	0.860498	0.782964	0.851806	0.869873	0.726429	0.837006	0.772848	0.868465	0.790987	0.799512	0.804649	1.00253	0.886761	0.901709	0.737237
	6.1	0.426177	0.301641	0.622867	0.279186	0.562698	0.377932	0.278638	0.754428	0.485266	0.501924	0.573187	0.577345	0.451844	0.383677	0.418012	0.85999	0.779731	0.850568	0.868456	0.721999	0.838294	0.769038	0.865306	0.791213	0.79525	0.803862	0.999656	0.88404	0.907654	0.736016
	6.2	0.424099	0.30116	0.619046	0.276839	0.561302	0.377581	0.277321	0.753685	0.482451	0.499529	0.571493	0.572366	0.452728	0.382488	0.415383	0.85677	0.778921	0.845755	0.865836	0.721446	0.829421	0.766105	0.862935	0.789791	0.792937	0.797268	0.996488	0.881886	0.899527	0.739302
	6.3	0.420641	0.298534	0.618126	0.274723	0.557656	0.374765	0.274284	0.750274	0.480179	0.498905	0.567657	0.568595	0.449885	0.383339	0.410976	0.854924	0.77418	0.846437	0.86187	0.719407	0.835452	0.764884	0.856918	0.789372	0.790876	0.79781	0.994966	0.880763	0.902292	0.733273
	6.4	0.419487	0.297324	0.615844	0.271953	0.557564	0.375543	0.274499	0.748044	0.478063	0.496129	0.565381	0.563893	0.448407	0.379807	0.411755	0.852175	0.774895	0.841907	0.858196	0.716388	0.833659	0.763317	0.856466	0.787654	0.791292	0.795164	0.990487	0.876629	0.889501	0.731997
	6.5	0.416768	0.295495	0.611799	0.270044	0.553632	0.375633	0.2732	0.745985	0.477059	0.495493	0.561474	0.560726	0.44851	0.381056	0.409637	0.849424	0.772276	0.840823	0.857262	0.715208	0.828676	0.760774	0.85394	0.786608	0.788019	0.792751	0.986825	0.873486	0.892079	0.731146
	6.6	0.414435	0.295582	0.609455	0.269928	0.553518	0.37602	0.272143	0.741785	0.475106	0.495374	0.558298	0.555942	0.445227	0.378979	0.408386	0.847381	0.768694	0.837927	0.853641	0.71277	0.823133	0.759522	0.851839	0.782314	0.787532	0.791503	0.985057	0.866302	0.890267	0.730459
	6.7	0.41207	0.294542	0.607535	0.266881	0.552136	0.372839	0.27166	0.740643	0.472518	0.491873	0.557611	0.551865	0.446078	0.374968	0.408193	0.841319	0.767083	0.836943	0.851736	0.710557	0.822274	0.756903	0.84995	0.779515	0.787581	0.789	0.982597	0.870738	0.886255	0.725931
	6.8	0.408428	0.29432	0.607718	0.265045	0.548082	0.374108	0.269844	0.738379	0.473992	0.490677	0.553388	0.549111	0.445477	0.377133	0.40604	0.839685	0.763031	0.834341	0.850748	0.710334	0.819704	0.756529	0.845795	0.785003	0.782228	0.785226	0.979484	0.861685	0.889157	0.72599
	6.9	0.408554	0.291421	0.604467	0.264034	0.547313	0.370352	0.268798	0.734352	0.470435	0.488111	0.553047	0.544407	0.441927	0.376484	0.402958	0.837066	0.761424	0.83214	0.845385	0.705153	0.812706	0.749611	0.842491	0.783669	0.78079	0.78442	0.97616	0.861611	0.882697	0.723632
	7	0.403618	0.292163	0.600197	0.262451	0.544925	0.364652	0.265758	0.727621	0.468887	0.485656	0.549358	0.540851	0.438717	0.374733	0.402952	0.834235	0.76303	0.831186	0.844014	0.703178	0.814897	0.750073	0.840088	0.778728	0.777284	0.778903	0.972779	0.859353	0.879162	0.725121
	7.1	0.400961	0.288687	0.588935	0.257349	0.539339	0.348367	0.260832	0.718256	0.459741	0.480695	0.545142	0.533074	0.432121	0.369883	0.396978	0.832632	0.758817	0.829472	0.84117	0.70228	0.813655	0.749468	0.839215	0.774712	0.777689	0.777978	0.971136	0.855855	0.881244	0.721022
	7.2	0.393967	0.282963	0.584813	0.252076	0.528624	0.340431	0.254804	0.708981	0.455288	0.474882	0.540238	0.525495	0.424587	0.362015	0.391257	0.829967	0.756725	0.825253	0.837497	0.701555	0.81066	0.745523	0.837925	0.776433	0.774594	0.777501	0.969412	0.861165	0.877689	0.719638
	7.3	0.385457	0.279944	0.582953	0.246235	0.522748	0.334169	0.245397	0.70165	0.44783	0.467896	0.533595	0.515515	0.416369	0.353652	0.386863	0.828111	0.750526	0.822583	0.834922	0.699104	0.806671	0.747136	0.833195	0.776636	0.773933	0.772559	0.967069	0.851904	0.877129	0.71819
	7.4	0.37716	0.275724	0.579237	0.243501	0.515245	0.326683	0.240663	0.692026	0.442098	0.460609	0.529701	0.506392	0.405295	0.350036	0.381894	0.82526	0.749169	0.819194	0.833914	0.698004	0.80686	0.741977	0.831129	0.774356	0.770927	0.769138	0.963373	0.843709	0.872484	0.718429
	7.5	0.370218	0.271911	0.578505	0.236014	0.510828	0.321384	0.237365	0.68537	0.433816	0.456248	0.52072	0.495103	0.402042	0.343333	0.375448	0.823843	0.748438	0.818757	0.829273	0.69391	0.800694	0.738994	0.829488	0.772475	0.772096	0.767867	0.959465	0.846148	0.868308	0.71351
	7.6	0.362022	0.265962	0.574277	0.231848	0.504563	0.316094	0.231664	0.677505	0.425624	0.451455	0.516018	0.484955	0.393944	0.337033	0.367958	0.821136	0.746014	0.821271	0.827322	0.693257	0.797581	0.737191	0.824917	0.769523	0.768929	0.768404	0.958555	0.843705	0.871374	0.711692
	7.7	0.351723	0.262521	0.573529	0.22687	0.500528	0.311955	0.226535	0.669676	0.420746	0.443996	0.506892	0.474779	0.389179	0.334177	0.366676	0.819863	0.746527	0.817618	0.825791	0.690401	0.800106	0.739007	0.819384	0.768073	0.765597	0.76627	0.954851	0.840509	0.866031	0.707997
	7.8	0.34417	0.257495	0.568273	0.221271	0.497552	0.306601	0.223564	0.664555	0.414644	0.437996	0.501838	0.465092	0.380314	0.330181	0.35728	0.814498	0.741233	0.809185	0.822192	0.689653	0.801091	0.733215	0.819781	0.765447	0.762383	0.762415	0.95155	0.840596	0.862968	0.708391
	7.9	0.334086	0.254816	0.570423	0.21585	0.4937	0.301158	0.221722	0.662325	0.405518	0.431266	0.494879	0.45415	0.377138	0.327113	0.352929	0.813687	0.741331	0.810761	0.819646	0.684616	0.793366	0.730842	0.815712	0.765272	0.761625	0.760605	0.948643	0.834025	0.864082	0.706767
	8	0.324655	0.25044	0.56624	0.212059	0.491505	0.300879	0.217054	0.658126	0.398697	0.427103	0.487699	0.44157	0.371122	0.326726	0.346865	0.811928	0.735281	0.805992	0.816033	0.683958	0.795191	0.731363	0.814808	0.762207	0.758311	0.756781	0.946561	0.836374	0.860989	0.709671
	8.1	0.316653	0.248234	0.566528	0.207746	0.48705	0.29683	0.212713	0.65279	0.391664	0.418754	0.479747	0.43261	0.366751	0.322586	0.340189	0.808785	0.738656	0.805739	0.812343	0.681209	0.794703	0.731196	0.811179	0.759997	0.760869	0.754582	0.941992	0.834377	0.854814	0.704918
	8.2	0.307427	0.24545	0.562694	0.203293	0.48435	0.293236	0.211923	0.647969	0.384314	0.412427	0.472545	0.421705	0.361279	0.319794	0.334494	0.805985	0.733534	0.807306	0.80954	0.68112	0.787995	0.730115	0.811505	0.756757	0.754682	0.752961	0.940202	0.833345	0.853354	0.703871
	8.3	0.298909	0.242708	0.55884	0.199455	0.481876	0.288476	0.207622	0.645425	0.377935	0.407322	0.465341	0.41085	0.356434	0.317759	0.329007	0.803731	0.732914	0.802433	0.807767	0.679621	0.790836	0.726432	0.807433	0.760755	0.756254	0.751652	0.93714	0.830708	0.854613	0.70499
	8.4	0.291328	0.240254	0.555246	0.195901	0.478606	0.287329	0.207103	0.641435	0.371676	0.399347	0.455349	0.400698	0.353521	0.315579	0.323697	0.802222	0.732418	0.799237	0.809701	0.677622	0.785108	0.721368	0.803959	0.758292	0.752778	0.749308	0.936846	0.82457	0.850231	0.70185
	8.5	0.28173	0.237516	0.556405	0.191731	0.477909	0.283901	0.204481	0.640708	0.365899	0.396352	0.450223	0.389955	0.349524	0.312761	0.320441	0.799034	0.727723	0.797603	0.803432	0.675389	0.786689	0.719511	0.802906	0.758823	0.748242	0.746256	0.932544	0.825501	0.850181	0.696961
	8.6	0.274623	0.23532	0.551755	0.188402	0.473977	0.283289	0.202982	0.637186	0.360791	0.390354	0.441103	0.379857	0.345527	0.312598	0.316842	0.795769	0.722384	0.800131	0.801746	0.672219	0.781535	0.718697	0.797828	0.754452	0.748467	0.743448	0.930461	0.823625	0.850376	0.700562
	8.7	0.267651	0.231056	0.551204	0.184014	0.47268	0.278741	0.199661	0.634468	0.354228	0.381877	0.43321	0.369412	0.34243	0.310338	0.307882	0.795028	0.725052	0.795845	0.798569	0.67235	0.780749	0.717369	0.797222	0.756559	0.748539	0.740751	0.929196	0.817788	0.849952	0.695809
	8.8	0.259429	0.229738	0.547761	0.181422	0.470077	0.276357	0.197073	0.629636	0.347981	0.376711	0.425955	0.360176	0.337612	0.306533	0.302682	0.791212	0.722167	0.79471	0.796559	0.671641	0.779208	0.718158	0.795187	0.751555	0.746267	0.739531	0.924498	0.820284	0.843732	0.696584
	8.9	0.252386	0.228488	0.5425	0.179215	0.468509	0.274215	0.194722	0.627499	0.342022	0.369078	0.417135	0.350865	0.335634	0.306123	0.297107	0.78943	0.720302	0.790617	0.794658	0.669415	0.776579	0.712946	0.793786	0.752165	0.740246	0.736416	0.922441	0.815262	0.844876	0.693891
	9	0.246953	0.226315	0.542719	0.175148	0.467199	0.273361	0.194753	0.624434	0.336844	0.362761	0.408382	0.340874	0.33198	0.304873	0.29088	0.786576	0.718726	0.790336	0.793627	0.666831	0.769956	0.711036	0.789711	0.749343	0.740442	0.735966	0.921002	0.811513	0.844136	0.689943
	9.1	0.241012	0.224501	0.5444	0.172983	0.463442	0.269317	0.193296	0.6223	0.331153	0.359933	0.403065	0.333659	0.330082	0.299686	0.28708	0.786641	0.717699	0.784714	0.790886	0.662564	0.771528	0.711481	0.788218	0.747281	0.741601	0.733316	0.917686	0.813245	0.83766	0.689362
	9.2	0.235998	0.224081	0.542729	0.171312	0.463692	0.268997	0.190014	0.619624	0.330588	0.357256	0.398597	0.327081	0.327209	0.299177	0.284262	0.784047	0.714414	0.784104	0.787416	0.662545	0.76955	0.707058	0.784663	0.747637	0.736763	0.731425	0.912734	0.813024	0.839304	0.686898
	9.3	0.230571	0.220951	0.541355	0.169664	0.461875	0.26534	0.189461	0.614691	0.326939	0.354134	0.39261	0.321258	0.326408	0.298151	0.281141	0.781132	0.71261	0.780963	0.781755	0.661465	0.767688	0.706384	0.7829	0.746679	0.735035	0.727348	0.912858	0.808865	0.835994	0.685707
	9.4	0.227289	0.219954	0.536983	0.166844	0.45796	0.266901	0.189	0.613558	0.325528	0.352917	0.389279	0.315298	0.324733	0.298242	0.278814	0.778737	0.710433	0.778738	0.782799	0.658553	0.76369	0.704296	0.781019	0.744547	0.734942	0.726309	0.909527	0.806879	0.828885	0.685873
	9.5	0.223558	0.219895	0.537964	0.16547	0.457921	0.265798	0.186392	0.613002	0.319589	0.348269	0.384817	0.309307	0.320142	0.297	0.27731	0.77746	0.706974	0.775949	0.779979	0.657214	0.761215	0.701737	0.777441	0.74394	0.733591	0.724067	0.906151	0.805883	0.834251	0.684579
	9.6	0.219889	0.21754	0.536257	0.164023	0.45716	0.265641	0.185472	0.610217	0.316751	0.345118	0.379561	0.304115	0.320269	0.297111	0.274699	0.773768	0.707999	0.775234	0.77912	0.657296	0.760465	0.701144	0.773416	0.741741	0.731939	0.723412	0.904533	0.801099	0.829136	0.684029
	9.7	0.216701	0.21738	0.534518	0.162574	0.456321	0.264327	0.185624	0.607212	0.316669	0.344346	0.376664	0.299557	0.319762	0.294106	0.272813	0.770074	0.706079	0.774901	0.775949	0.65129	0.757971	0.69681	0.773941	0.737138	0.730096	0.719939	0.902757	0.795574	0.827737	0.680447
	9.8	0.214673	0.217699	0.532223	0.160712	0.453216	0.263702	0.185001	0.605868	0.313857	0.342494	0.373663	0.295455	0.318123	0.293867	0.270023	0.768827	0.705495	0.769287	0.773009	0.652394	0.755342	0.696546	0.770292	0.736529	0.728037	0.7181	0.899781	0.799728	0.822607	0.680734
	9.9	0.211351	0.216213	0.53242	0.159481	0.452063	0.263968	0.184191	0.604123	0.312623	0.34243	0.371874	0.290764	0.314823	0.294179	0.268357	0.767458	0.701329	0.772557	0.772754	0.649989	0.750065	0.693941	0.768365	0.739561	0.72495	0.718134	0.896414	0.792431	0.827215	0.680322
	10	0.208475	0.216252	0.535433	0.15801	0.452599	0.262114	0.182962	0.601514	0.309928	0.338374	0.368613	0.287291	0.314059	0.292493	0.26536	0.76567	0.698412	0.767687	0.768239	0.64812	0.751289	0.691921	0.764995	0.734088	0.727568	0.713618	0.892592	0.788085	0.816071	0.678774
	10.1	0.206436	0.214857	0.525869	0.155669	0.449555	0.262595	0.180475	0.600075	0.307718	0.335875	0.36434	0.284378	0.313135	0.293192	0.264695	0.762487	0.696832	0.769029	0.767326	0.646606	0.750264	0.692026	0.763979	0.732897	0.721257	0.713584	0.892374	0.790692	0.824442	0.678097
	10.2	0.204195	0.214555	0.527986	0.155569	0.447899	0.260441	0.180918	0.599334	0.307056	0.335473	0.3634	0.279976	0.312581	0.291923	0.263803	0.761424	0.69422	0.762673	0.763027	0.645635	0.74814	0.688594	0.763665	0.732704	0.721658	0.711263	0.888342	0.791948	0.819038	0.676619
	10.3	0.201589	0.214218	0.530498	0.154323	0.447487	0.260751	0.180675	0.597426	0.304883	0.334724	0.358612	0.276028	0.312681	0.293024	0.260026	0.759176	0.693105	0.761859	0.762572	0.644002	0.745733	0.687493	0.758192	0.732313	0.719857	0.708657	0.887777	0.782479	0.82101	0.673676
	10.4	0.199754	0.212853	0.525349	0.153421	0.447093	0.260459	0.180303	0.595991	0.301064	0.330789	0.358814	0.273294	0.30823	0.292026	0.258931	0.755814	0.689352	0.761589	0.758873	0.638396	0.744888	0.68567	0.758952	0.733986	0.719382	0.707299	0.88433	0.786064	0.81911	0.670397
	10.5	0.198068	0.212798	0.525176	0.152387	0.444738	0.260058	0.179728	0.592222	0.301958	0.329775	0.355751	0.270467	0.308921	0.290529	0.256546	0.753725	0.68515	0.758935	0.756754	0.638263	0.744626	0.679672	0.754916	0.730146	0.717557	0.703205	0.880455	0.781893	0.811078	0.668957
	10.6	0.196549	0.212382	0.520586	0.151725	0.445322	0.262501	0.178117	0.590094	0.300422	0.3292	0.355022	0.267725	0.306539	0.28947	0.254773	0.75127	0.685062	0.758049	0.7542	0.636309	0.742498	0.681264	0.752795	0.729341	0.71744	0.700859	0.880562	0.776579	0.812963	0.66943
	10.7	0.19509	0.211454	0.523645	0.150313	0.443478	0.260963	0.177818	0.592357	0.298252	0.326723	0.350991	0.265081	0.309745	0.29103	0.25261	0.750183	0.68421	0.754331	0.750884	0.635798	0.736838	0.683393	0.750716	0.727392	0.712573	0.699193	0.876827	0.781273	0.811025	0.666918
	10.8	0.193425	0.211185	0.523171	0.150624	0.442591	0.259456	0.178694	0.58698	0.299853	0.324825	0.350299	0.262048	0.309482	0.289295	0.250882	0.747161	0.68351	0.751657	0.750255	0.635044	0.737926	0.678766	0.748285	0.72617	0.711616	0.696438	0.873937	0.777561	0.809221	0.666912
	10.9	0.192089	0.211545	0.520911	0.149323	0.441152	0.263109	0.178542	0.583562	0.297755	0.323981	0.348448	0.259757	0.308007	0.289154	0.251258	0.744445	0.681939	0.753305	0.749484	0.632762	0.734118	0.677813	0.748514	0.726429	0.710059	0.694715	0.873128	0.77611	0.808737	0.664985
	11	0.191241	0.211937	0.519756	0.148602	0.441145	0.261007	0.178553	0.582467	0.29552	0.323839	0.347122	0.258163	0.306562	0.290575	0.248684	0.742705	0.679024	0.749223	0.747699	0.63182	0.733928	0.676719	0.74336	0.7261	0.707772	0.694101	0.870113	0.776234	0.809606	0.663638
	11.1	0.189396	0.211385	0.517669	0.148217	0.438946	0.257922	0.176952	0.58038	0.295207	0.322214	0.343727	0.255707	0.308557	0.289959	0.248177	0.742484	0.679447	0.746024	0.743546	0.629308	0.729185	0.672252	0.741818	0.721736	0.705937	0.692159	0.869038	0.778526	0.806643	0.661044
	11.2	0.189592	0.21071	0.517891	0.147782	0.437365	0.260436	0.178013	0.578632	0.295947	0.320728	0.342851	0.253731	0.305888	0.289299	0.245362	0.737708	0.677721	0.746786	0.741128	0.627536	0.72928	0.670805	0.739419	0.725335	0.703224	0.68902	0.864914	0.769918	0.803467	0.661108
	11.3	0.187266	0.21126	0.513084	0.147323	0.437778	0.259811	0.175245	0.577216	0.292842	0.320031	0.341372	0.251899	0.306439	0.288535	0.244052	0.736385	0.674271	0.745782	0.739576	0.62497	0.724017	0.670246	0.740221	0.719484	0.70329	0.69059	0.864048	0.771238	0.798916	0.659969
	11.4	0.185701	0.20984	0.517244	0.146487	0.436591	0.260279	0.176473	0.576147	0.292605	0.319057	0.340065	0.249794	0.307566	0.287563	0.242881	0.736249	0.671301	0.741887	0.738087	0.625742	0.725833	0.666748	0.736341	0.719133	0.702751	0.686312	0.859892	0.766946	0.799889	0.657711
	11.5	0.185168	0.210847	0.514256	0.146741	0.435988	0.260103	0.176762	0.574995	0.289685	0.316671	0.339584	0.248174	0.303466	0.28841	0.244187	0.732831	0.670347	0.74167	0.736293	0.621554	0.725982	0.667565	0.73246	0.718777	0.700181	0.684189	0.859012	0.766145	0.797162	0.656983
	11.6	0.18598	0.209966	0.513259	0.145718	0.434031	0.259415	0.176349	0.573648	0.288704	0.317174	0.337908	0.245976	0.305024	0.289735	0.240728	0.731263	0.671327	0.741107	0.732867	0.62176	0.723587	0.663287	0.730752	0.716504	0.698632	0.680609	0.855672	0.763766	0.796823	0.657823
	11.7	0.184218	0.210752	0.513207	0.1463	0.433598	0.261435	0.176622	0.571637	0.290994	0.313846	0.33594	0.244259	0.304063	0.289409	0.239508	0.729414	0.664802	0.735545	0.730937	0.619141	0.719671	0.664643	0.728436	0.716637	0.697639	0.680788	0.854842	0.759407	0.79423	0.654371
	11.8	0.182526	0.209822	0.509704	0.144723	0.431306	0.262443	0.177342	0.570924	0.288359	0.314675	0.33403	0.243863	0.304814	0.288402	0.24022	0.726244	0.662358	0.737245	0.728638	0.61833	0.715609	0.661084	0.72522	0.71524	0.694433	0.679881	0.851663	0.755423	0.795038	0.654183
	11.9	0.181809	0.211488	0.509337	0.144415	0.430802	0.262083	0.176207	0.56903	0.288274	0.313737	0.333362	0.241231	0.302515	0.289132	0.238261	0.725466	0.661367	0.731163	0.728014	0.617782	0.714584	0.661099	0.722709	0.714485	0.695828	0.675761	0.850614	0.755818	0.794679	0.653817
	12	0.182609	0.210871	0.508085	0.143874	0.428888	0.257372	0.17563	0.562671	0.285906	0.313332	0.332172	0.239521	0.304887	0.288042	0.237504	0.723733	0.662318	0.732919	0.724508	0.614656	0.71256	0.658235	0.72459	0.709554	0.692433	0.67401	0.847729	0.752123	0.788913	0.650914
	12.1	0.181098	0.208898	0.497546	0.143367	0.42585	0.255285	0.176577	0.553882	0.285649	0.308624	0.330697	0.236429	0.299692	0.287632	0.234095	0.72151	0.659827	0.732907	0.723908	0.613243	0.710003	0.656684	0.720723	0.709146	0.69275	0.672802	0.845018	0.7522	0.789554	0.651121
	12.2	0.179193	0.208682	0.494854	0.1429	0.422453	0.249298	0.173388	0.546442	0.283641	0.303522	0.327506	0.23348	0.297013	0.286796	0.230535	0.717901	0.658072	0.725665	0.722389	0.613245	0.712131	0.659003	0.718232	0.710109	0.689892	0.671096	0.843471	0.7517	0.786842	0.645417
	12.3	0.176343	0.208429	0.494878	0.14124	0.418526	0.246796	0.170822	0.540125	0.280676	0.297421	0.323906	0.230136	0.294247	0.284016	0.227833	0.718414	0.656195	0.729651	0.719401	0.608454	0.710834	0.654705	0.715664	0.707987	0.687218	0.669038	0.839864	0.749724	0.783089	0.646822
	12.4	0.175246	0.205443	0.49086	0.140382	0.414752	0.245649	0.16888	0.533944	0.276275	0.293388	0.321425	0.226352	0.288071	0.279489	0.225078	0.714957	0.653361	0.724623	0.714584	0.609124	0.709682	0.651874	0.714081	0.706126	0.685402	0.669287	0.838718	0.742352	0.782178	0.646354
	12.5	0.173859	0.202513	0.490392	0.138345	0.410341	0.242261	0.165539	0.52626	0.275124	0.289546	0.317517	0.223103	0.286062	0.278475	0.220315	0.712917	0.656938	0.722489	0.71454	0.607568	0.705142	0.649252	0.713166	0.705268	0.685742	0.666138	0.835599	0.745857	0.782525	0.64537
	12.6	0.170574	0.203409	0.487719	0.13708	0.408259	0.243584	0.165962	0.523343	0.272269	0.284759	0.314336	0.219756	0.281945	0.276895	0.220013	0.710664	0.651438	0.721501	0.714347	0.607322	0.701998	0.648791	0.712057	0.706467	0.684927	0.664622	0.834573	0.743589	0.781899	0.642502
	12.7	0.169216	0.20284	0.485804	0.135809	0.403832	0.241079	0.165118	0.518613	0.267434	0.280832	0.311085	0.216293	0.280613	0.276097	0.215986	0.710586	0.650707	0.724461	0.711634	0.605774	0.69973	0.646266	0.708101	0.701024	0.68452	0.663588	0.831062	0.742332	0.777987	0.64219
	12.8	0.166935	0.200244	0.48518	0.134622	0.398858	0.240449	0.162669	0.514132	0.265056	0.27624	0.306686	0.212323	0.279362	0.27617	0.212722	0.70646	0.648265	0.720189	0.709826	0.602119	0.698411	0.643193	0.707672	0.701528	0.680089	0.661219	0.831179	0.742912	0.776297	0.64284
	12.9	0.165395	0.198536	0.480168	0.133808	0.395681	0.237223	0.162385	0.508952	0.262392	0.273438	0.30301	0.208633	0.275502	0.275171	0.209485	0.706226	0.644722	0.718666	0.705424	0.600964	0.70221	0.641677	0.706454	0.703271	0.678835	0.657423	0.827801	0.738398	0.774348	0.637467
	13	0.163121	0.198861	0.478836	0.132882	0.392984	0.239522	0.161795	0.507834	0.260249	0.268954	0.298874	0.20493	0.273513	0.274362	0.207967	0.703226	0.645748	0.714609	0.704791	0.597124	0.701686	0.641283	0.704013	0.696775	0.676868	0.656062	0.824297	0.734013	0.771808	0.639379
	13.1	0.161238	0.195319	0.47535	0.131359	0.390804	0.236188	0.160926	0.503771	0.257349	0.263446	0.295838	0.201141	0.271665	0.275232	0.205649	0.701288	0.644206	0.713866	0.703414	0.59926	0.695095	0.637793	0.698537	0.700921	0.675897	0.655893	0.82432	0.734713	0.772541	0.637901
	13.2	0.160204	0.19546	0.474353	0.130369	0.388415	0.233804	0.160119	0.50264	0.254307	0.260491	0.290707	0.197605	0.267471	0.272949	0.202638	0.699206	0.643421	0.712056	0.699894	0.596887	0.695827	0.641062	0.698779	0.696464	0.675233	0.651504	0.820507	0.732629	0.768708	0.633528
	13.3	0.156937	0.194344	0.474901	0.129695	0.385481	0.234128	0.158315	0.500042	0.252264	0.256888	0.288011	0.194164	0.264911	0.269957	0.200401	0.695615	0.639024	0.714614	0.699021	0.595823	0.693803	0.637389	0.697904	0.695675	0.672239	0.650646	0.81801	0.731597	0.768105	0.635442
	13.4	0.15663	0.194864	0.473315	0.128581	0.38654	0.233242	0.15755	0.497502	0.251597	0.254625	0.282321	0.18995	0.263193	0.271103	0.200243	0.69348	0.636974	0.706993	0.69543	0.593139	0.686954	0.635453	0.695047	0.694094	0.671842	0.648136	0.81619	0.726581	0.770008	0.631223
	13.5	0.153851	0.192927	0.469741	0.127511	0.383969	0.233336	0.157743	0.495668	0.247236	0.250543	0.278066	0.187274	0.262102	0.271772	0.197956	0.693145	0.635964	0.709127	0.692994	0.591243	0.690221	0.63512	0.69332	0.693819	0.668153	0.648004	0.81437	0.728286	0.764635	0.628274
	13.6	0.15178	0.193083	0.46486	0.126233	0.381875	0.231892	0.157674	0.491661	0.244174	0.24791	0.273172	0.183816	0.260958	0.268658	0.195358	0.690074	0.635613	0.706572	0.693938	0.589791	0.688359	0.631155	0.691772	0.693525	0.669378	0.647693	0.81061	0.722764	0.764223	0.630606
	13.7	0.150554	0.191447	0.46391	0.125948	0.379951	0.22931	0.154807	0.490171	0.242349	0.24351	0.270825	0.180276	0.259306	0.268126	0.192387	0.689233	0.631766	0.703635	0.691435	0.589204	0.683521	0.632615	0.688636	0.690282	0.664864	0.642391	0.808207	0.723528	0.759803	0.629783
	13.8	0.148731	0.189941	0.461741	0.124923	0.379057	0.227366	0.155633	0.485503	0.240388	0.240001	0.265212	0.176633	0.258108	0.267367	0.19106	0.6879	0.633803	0.705617	0.690354	0.58808	0.683056	0.631279	0.687874	0.695173	0.666698	0.643569	0.808316	0.720429	0.763964	0.630415
	13.9	0.146784	0.190705	0.46059	0.124112	0.377852	0.228032	0.154318	0.484472	0.237937	0.238023	0.262357	0.173318	0.255622	0.268616	0.188735	0.685865	0.63146	0.702837	0.687994	0.585586	0.681831	0.629323	0.687696	0.687563	0.664982	0.641008	0.807192	0.717538	0.757396	0.627538
	14	0.145327	0.190847	0.459333	0.123919	0.376524	0.226107	0.152984	0.483947	0.23528	0.234799	0.256793	0.170535	0.255292	0.266976	0.187582	0.681871	0.633083	0.703249	0.683881	0.586003	0.68035	0.630585	0.68298	0.687762	0.661183	0.638018	0.803717	0.714016	0.759456	0.627004
	14.1	0.144267	0.18896	0.457736	0.123157	0.374976	0.22653	0.154047	0.480149	0.234546	0.232433	0.254558	0.168559	0.255883	0.267955	0.187385	0.681094	0.629115	0.699489	0.683004	0.581913	0.682265	0.628369	0.681488	0.68428	0.662321	0.634531	0.802022	0.711242	0.760405	0.623852
	14.2	0.143387	0.189506	0.45884	0.122146	0.374657	0.228653	0.152457	0.478886	0.234251	0.229615	0.250614	0.166831	0.253701	0.265794	0.184706	0.679365	0.626805	0.697171	0.681979	0.583185	0.678141	0.626617	0.679166	0.687295	0.658982	0.6339	0.801071	0.716877	0.754868	0.624089
	14.3	0.14252	0.188414	0.456463	0.121319	0.373396	0.225522	0.151988	0.47715	0.233649	0.228289	0.248842	0.163464	0.251422	0.267226	0.18477	0.678613	0.624643	0.69499	0.678913	0.57918	0.677345	0.620774	0.676438	0.684651	0.65818	0.633706	0.799635	0.711423	0.751981	0.62303
	14.4	0.140919	0.187741	0.455879	0.12143	0.373327	0.225333	0.151702	0.475333	0.232216	0.225836	0.246024	0.161619	0.251952	0.266409	0.183741	0.677318	0.620069	0.695922	0.675595	0.577721	0.674445	0.621942	0.676054	0.685486	0.656728	0.630933	0.795987	0.710782	0.752106	0.621339
	14.5	0.140772	0.187787	0.453661	0.119957	0.37162	0.22586	0.148944	0.475515	0.231254	0.226496	0.244817	0.160508	0.251505	0.26404	0.183533	0.673937	0.621194	0.690364	0.675522	0.577877	0.672616	0.618956	0.674839	0.68334	0.655877	0.630919	0.793805	0.708256	0.74756	0.620351
	14.6	0.139439	0.187943	0.454488	0.119659	0.369052	0.22626	0.151231	0.471963	0.229461	0.224136	0.241827	0.158907	0.251482	0.266774	0.182011	0.67264	0.619531	0.690691	0.675056	0.575434	0.66812	0.616542	0.673684	0.681782	0.655447	0.627104	0.791586	0.707512	0.746569	0.619496
	14.7	0.138906	0.187425	0.453699	0.119245	0.370413	0.225171	0.150299	0.47127	0.229863	0.223732	0.241062	0.15728	0.250788	0.265673	0.182124	0.671503	0.618988	0.688012	0.672299	0.575732	0.67168	0.617539	0.669514	0.679921	0.652648	0.62569	0.78893	0.708357	0.748735	0.61687
	14.8	0.138656	0.187672	0.450979	0.118181	0.367946	0.225194	0.15097	0.470083	0.228387	0.222834	0.2391	0.156165	0.248746	0.264453	0.180452	0.668559	0.615297	0.686417	0.670129	0.574598	0.670492	0.614685	0.667063	0.679881	0.650267	0.626806	0.787535	0.704034	0.743785	0.613902
	14.9	0.137119	0.187148	0.453088	0.118356	0.36795	0.224208	0.15059	0.468462	0.227118	0.220793	0.237575	0.154144	0.24988	0.265289	0.180263	0.665975	0.613485	0.685069	0.666078	0.572975	0.671373	0.612635	0.665715	0.677792	0.648501	0.622673	0.784868	0.700148	0.742172	0.613467
	15	0.136357	0.186123	0.449895	0.11783	0.367645	0.224281	0.149709	0.468995	0.22731	0.220149	0.235251	0.152938	0.248048	0.264545	0.17915	0.665933	0.614375	0.682423	0.666558	0.573329	0.661814	0.613462	0.664289	0.676806	0.649862	0.620599	0.783431	0.698124	0.742988	0.614628
	15.1	0.135373	0.185088	0.447997	0.117697	0.36662	0.225104	0.149108	0.46702	0.225063	0.219324	0.233354	0.151986	0.248856	0.264104	0.179195	0.664028	0.614528	0.685693	0.664891	0.569749	0.666625	0.610941	0.660345	0.677481	0.646927	0.617331	0.782933	0.700607	0.742751	0.612773
	15.2	0.134916	0.185043	0.448761	0.11722	0.365214	0.22558	0.14826	0.46672	0.225327	0.217486	0.231539	0.150578	0.249413	0.264609	0.179433	0.662156	0.610925	0.684574	0.662566	0.569841	0.660951	0.610069	0.661251	0.673959	0.6457	0.618853	0.779025	0.697112	0.740581	0.610513
	15.3	0.134493	0.185426	0.447279	0.116309	0.364686	0.223732	0.149539	0.463911	0.224908	0.216966	0.23038	0.149509	0.246497	0.264028	0.179039	0.661535	0.610222	0.681733	0.662317	0.567334	0.661751	0.609265	0.659705	0.673428	0.642346	0.61534	0.777608	0.695393	0.737702	0.612945
	15.4	0.133925	0.185709	0.447148	0.116803	0.364407	0.22455	0.149721	0.463689	0.224318	0.216314	0.230317	0.148189	0.245533	0.264423	0.177837	0.65925	0.606634	0.683845	0.660199	0.566013	0.659352	0.60603	0.659218	0.671379	0.642185	0.614219	0.775747	0.693647	0.737034	0.610035
	15.5	0.133375	0.18485	0.446019	0.116522	0.363528	0.223745	0.148817	0.462048	0.222687	0.217436	0.228749	0.147513	0.24623	0.265327	0.177812	0.657419	0.603506	0.675443	0.657195	0.563208	0.659311	0.604051	0.655957	0.672294	0.64511	0.614041	0.774041	0.695189	0.735601	0.60766
	15.6	0.132434	0.185715	0.447156	0.115715	0.363326	0.225941	0.148224	0.459563	0.224788	0.215057	0.228033	0.146256	0.245259	0.265718	0.177237	0.654468	0.603544	0.674362	0.655406	0.562347	0.656736	0.606149	0.655962	0.667965	0.641097	0.613094	0.772057	0.694069	0.738362	0.607795
	15.7	0.132692	0.18583	0.446819	0.115574	0.362239	0.224955	0.148647	0.457599	0.223152	0.215271	0.225981	0.14563	0.247211	0.263626	0.176397	0.653646	0.604154	0.67725	0.652285	0.561384	0.653551	0.605737	0.651292	0.669488	0.640888	0.6096	0.76939	0.692619	0.734906	0.604535
	15.8	0.13187	0.185108	0.443918	0.11608	0.360046	0.226323	0.148034	0.45993	0.22258	0.214685	0.226524	0.144994	0.244702	0.263918	0.175244	0.65117	0.603522	0.671661	0.653021	0.558659	0.653303	0.598499	0.649033	0.669119	0.641505	0.60874	0.76754	0.691088	0.731753	0.607482
	15.9	0.132626	0.185846	0.444737	0.115495	0.361714	0.225751	0.148318	0.457388	0.221693	0.214464	0.224861	0.143888	0.24676	0.264848	0.17552	0.65131	0.596751	0.670613	0.651016	0.55737	0.65342	0.603497	0.647908	0.668406	0.63726	0.607131	0.765537	0.685328	0.728004	0.606396
	16	0.130919	0.185589	0.443442	0.114799	0.360313	0.224622	0.14867	0.455519	0.221091	0.212545	0.224712	0.143106	0.248005	0.263865	0.175704	0.648292	0.600413	0.670244	0.647437	0.558697	0.65122	0.597568	0.647364	0.667388	0.637074	0.605656	0.764318	0.683988	0.729769	0.603566
	16.1	0.131404	0.186142	0.443116	0.115019	0.359701	0.225387	0.149564	0.455593	0.219755	0.212329	0.223968	0.142558	0.247131	0.264837	0.17461	0.644725	0.59808	0.670417	0.648634	0.556233	0.649734	0.597759	0.64701	0.666262	0.634733	0.604572	0.761703	0.682141	0.728366	0.604116
	16.2	0.130778	0.184771	0.441461	0.114403	0.36009	0.223565	0.148515	0.456004	0.221359	0.212499	0.222751	0.142276	0.246457	0.264989	0.173804	0.645096	0.592833	0.669221	0.646382	0.556152	0.649856	0.597031	0.64572	0.665422	0.633194	0.603147	0.760338	0.685549	0.726009	0.599991
	16.3	0.130358	0.18487	0.442406	0.114756	0.358355	0.225842	0.148921	0.454401	0.219031	0.211286	0.222036	0.141473	0.245816	0.265403	0.175177	0.644686	0.596612	0.666201	0.644048	0.554303	0.648017	0.594592	0.642245	0.661419	0.630964	0.60034	0.758205	0.677923	0.727458	0.60241
	16.4	0.129622	0.186667	0.440777	0.114246	0.358367	0.225437	0.148483	0.45162	0.219505	0.210328	0.219809	0.140564	0.244782	0.264773	0.173517	0.640161	0.59475	0.666817	0.642043	0.551732	0.648713	0.593719	0.64161	0.662151	0.630071	0.599249	0.758083	0.679528	0.724014	0.600193
	16.5	0.129578	0.185424	0.441872	0.113972	0.357847	0.224596	0.147885	0.450868	0.219718	0.211692	0.220306	0.140259	0.245326	0.264902	0.173543	0.640892	0.59155	0.663973	0.639186	0.549962	0.642903	0.593539	0.639053	0.659756	0.629252	0.596363	0.754159	0.677132	0.722847	0.59969
	16.6	0.1303	0.186267	0.439769	0.114216	0.356431	0.227281	0.149121	0.452951	0.219758	0.211262	0.219445	0.139786	0.245943	0.266083	0.174593	0.638402	0.587689	0.659746	0.63912	0.549936	0.643197	0.593211	0.637588	0.659776	0.629253	0.59647	0.753177	0.68001	0.71874	0.594489
	16.7	0.129697	0.186871	0.439517	0.114384	0.355947	0.225855	0.148698	0.450294	0.218429	0.210041	0.218472	0.139763	0.24603	0.265209	0.173718	0.636251	0.58791	0.659515	0.637201	0.547959	0.640509	0.589823	0.637914	0.660092	0.625844	0.594557	0.751613	0.678295	0.72075	0.598573
	16.8	0.129006	0.186052	0.439123	0.113697	0.356624	0.227682	0.147135	0.449426	0.220157	0.209851	0.218501	0.13869	0.245549	0.26527	0.174209	0.633963	0.586282	0.662268	0.635096	0.548189	0.63881	0.589729	0.632527	0.657416	0.625274	0.592049	0.748852	0.673048	0.720406	0.594395
	16.9	0.128759	0.186532	0.437337	0.114188	0.355404	0.227654	0.148521	0.4466	0.218396	0.210601	0.217156	0.138827	0.24606	0.264761	0.173357	0.632986	0.587838	0.658464	0.632558	0.545926	0.638042	0.588569	0.632879	0.65573	0.623676	0.590255	0.746739	0.672404	0.719331	0.591259
	17	0.129626	0.185879	0.435781	0.113627	0.354535	0.226498	0.14922	0.445894	0.218244	0.21025	0.216756	0.137735	0.246557	0.267268	0.173562	0.632436	0.584381	0.654971	0.632288	0.543705	0.635756	0.586427	0.632533	0.655713	0.622459	0.589815	0.745064	0.668863	0.717508	0.592828
	17.1	0.127923	0.186693	0.434042	0.113413	0.354741	0.227079	0.14847	0.445109	0.218524	0.2104	0.21857	0.137547	0.248112	0.267158	0.17416	0.631099	0.583614	0.656346	0.63035	0.544628	0.637243	0.581994	0.629393	0.655863	0.620948	0.587947	0.743571	0.667375	0.714884	0.591272
	17.2	0.128016	0.186063	0.433757	0.11364	0.35342	0.227614	0.147117	0.443398	0.218152	0.209041	0.217036	0.137078	0.246961	0.267856	0.173361	0.628898	0.581931	0.653029	0.627729	0.544202	0.632319	0.582767	0.627316	0.653533	0.618973	0.586749	0.741682	0.667707	0.711368	0.590638
	17.3	0.127678	0.186983	0.436742	0.11345	0.352649	0.229269	0.14754	0.442743	0.219633	0.210696	0.215972	0.136835	0.246814	0.266763	0.174704	0.628172	0.577925	0.650939	0.627046	0.54047	0.632648	0.58253	0.623928	0.654401	0.61969	0.586511	0.73976	0.667301	0.709827	0.589546
	17.4	0.12836	0.187729	0.432292	0.113957	0.353238	0.22711	0.148419	0.442317	0.218526	0.209742	0.21619	0.136684	0.245659	0.267207	0.173133	0.626343	0.579175	0.650758	0.62471	0.540477	0.630209	0.579796	0.623406	0.651399	0.61783	0.584179	0.737866	0.663659	0.711635	0.589679
	17.5	0.128781	0.187704	0.436959	0.113633	0.351255	0.229395	0.149268	0.442293	0.217285	0.209021	0.215619	0.136388	0.246533	0.268464	0.173159	0.623826	0.579847	0.652603	0.621599	0.538695	0.629111	0.578865	0.624371	0.649892	0.616013	0.582931	0.736811	0.661897	0.712912	0.586924
	17.6	0.128216	0.188129	0.432264	0.113513	0.351284	0.22913	0.148515	0.439003	0.217879	0.209776	0.215524	0.135942	0.24637	0.268836	0.173862	0.619961	0.579372	0.649096	0.620549	0.53808	0.630444	0.578591	0.620519	0.648743	0.614838	0.581181	0.734244	0.66565	0.71035	0.58648
	17.7	0.127374	0.187722	0.432678	0.113633	0.35061	0.228455	0.149658	0.439111	0.21713	0.20906	0.214835	0.135294	0.246464	0.267701	0.172876	0.6194	0.576129	0.647457	0.620226	0.536177	0.626405	0.576027	0.62016	0.648444	0.611787	0.578743	0.732558	0.659558	0.710666	0.584447
	17.8	0.128504	0.18809	0.430572	0.113851	0.351465	0.22846	0.149073	0.43805	0.217907	0.209265	0.214572	0.13507	0.2463	0.267777	0.173439	0.617551	0.572396	0.647223	0.61672	0.535772	0.628388	0.576737	0.618809	0.645981	0.612425	0.577833	0.731551	0.658808	0.705117	0.583942
	17.9	0.127253	0.188036	0.435318	0.113605	0.350408	0.229702	0.149625	0.437755	0.218594	0.209473	0.214667	0.135153	0.248549	0.266976	0.173272	0.617078	0.573441	0.647396	0.615513	0.534777	0.625971	0.575048	0.617486	0.646766	0.612004	0.575791	0.730601	0.658767	0.70723	0.584345
	18	0.127512	0.188918	0.431374	0.113103	0.35071	0.230111	0.150061	0.437502	0.218576	0.209607	0.213487	0.135177	0.249069	0.269466	0.173734	0.6169	0.575331	0.644302	0.616119	0.532658	0.622384	0.574251	0.614839	0.645924	0.610269	0.575794	0.728415	0.655467	0.703061	0.580494
	18.1	0.127466	0.188901	0.430599	0.113232	0.349108	0.232905	0.149473	0.434395	0.217615	0.210408	0.213525	0.134763	0.248916	0.268168	0.173767	0.616138	0.569513	0.641945	0.614942	0.531764	0.621445	0.575755	0.613438	0.644705	0.608099	0.572928	0.726299	0.653564	0.698565	0.580281
	18.2	0.127382	0.190539	0.429043	0.113094	0.348973	0.23155	0.151573	0.433526	0.21774	0.210553	0.213039	0.134037	0.24673	0.268339	0.173299	0.613687	0.569734	0.643364	0.610597	0.530362	0.621345	0.573275	0.612124	0.645926	0.608056	0.57155	0.724759	0.655872	0.703798	0.579375
	18.3	0.127218	0.189888	0.43089	0.113728	0.34841	0.231307	0.1514	0.433104	0.217188	0.210234	0.213349	0.134582	0.249049	0.269987	0.173934	0.610542	0.569585	0.64112	0.611092	0.529815	0.61849	0.572265	0.609973	0.641723	0.608062	0.567887	0.723002	0.649563	0.700369	0.578587
	18.4	0.127655	0.191303	0.429832	0.113477	0.347817	0.230633	0.152482	0.432047	0.2174	0.210145	0.212654	0.134597	0.250597	0.271016	0.173132	0.607688	0.569199	0.639363	0.608529	0.528188	0.61676	0.571118	0.60827	0.641286	0.605171	0.569294	0.719734	0.657467	0.698081	0.577962
	18.5	0.12722	0.191394	0.430336	0.113929	0.348798	0.232086	0.151178	0.433065	0.217255	0.209144	0.212288	0.13448	0.248869	0.270291	0.174289	0.608564	0.565084	0.639926	0.606622	0.526162	0.61545	0.570696	0.607979	0.642046	0.604475	0.566681	0.718561	0.648008	0.696784	0.577567
	18.6	0.127901	0.191101	0.430648	0.113639	0.346919	0.233539	0.152011	0.431353	0.217243	0.210392	0.212351	0.133802	0.250237	0.271863	0.174511	0.604852	0.568372	0.637748	0.605343	0.527384	0.612554	0.56628	0.607055	0.641672	0.601458	0.565581	0.717482	0.646692	0.695156	0.575847
	18.7	0.12763	0.191823	0.426765	0.113835	0.34773	0.232149	0.151821	0.430058	0.218449	0.210087	0.211641	0.133713	0.250487	0.271643	0.174681	0.603211	0.564133	0.637916	0.604006	0.524608	0.617785	0.564902	0.604713	0.638775	0.604073	0.564428	0.716329	0.646471	0.692696	0.574632
	18.8	0.127663	0.191364	0.426187	0.113583	0.346983	0.232967	0.15173	0.429448	0.219598	0.209653	0.212573	0.134177	0.249126	0.27113	0.175117	0.603196	0.564599	0.634651	0.601109	0.523619	0.613815	0.561615	0.602589	0.63773	0.601899	0.565048	0.713379	0.649037	0.689206	0.574374
	18.9	0.127412	0.19066	0.427	0.114201	0.345884	0.23398	0.152834	0.428421	0.217925	0.210456	0.212839	0.133704	0.249119	0.273352	0.174655	0.602216	0.562312	0.635044	0.60092	0.521385	0.608366	0.562376	0.602782	0.639511	0.599224	0.563831	0.712082	0.643143	0.694591	0.572366
	19	0.127427	0.192448	0.424269	0.11406	0.345486	0.234241	0.152804	0.429087	0.220098	0.21151	0.211752	0.133261	0.248212	0.27263	0.174406	0.600868	0.562521	0.635674	0.600662	0.522423	0.608601	0.559168	0.600774	0.632786	0.597814	0.560423	0.711565	0.642185	0.692818	0.5729
	19.1	0.127734	0.192872	0.426121	0.114125	0.34434	0.2342	0.152292	0.427183	0.218059	0.211534	0.211918	0.133714	0.250634	0.273014	0.176347	0.598644	0.560119	0.628826	0.596244	0.520743	0.609152	0.558891	0.597991	0.635869	0.599909	0.559655	0.709936	0.642999	0.688505	0.572671
	19.2	0.127037	0.193085	0.426214	0.114277	0.344767	0.234285	0.152067	0.425948	0.219363	0.21057	0.211699	0.133739	0.249697	0.27372	0.174686	0.598435	0.558823	0.630872	0.594962	0.5188	0.608777	0.558705	0.595457	0.634645	0.597383	0.556664	0.707853	0.641438	0.685808	0.572035
	19.3	0.128437	0.191459	0.425406	0.115015	0.344703	0.233867	0.152862	0.42387	0.218401	0.211093	0.210519	0.133114	0.250968	0.275205	0.176189	0.596602	0.556922	0.627624	0.594654	0.516512	0.604946	0.558614	0.594421	0.633737	0.594037	0.554989	0.705942	0.64242	0.688508	0.572221
	19.4	0.127644	0.193101	0.4264	0.114733	0.344343	0.234285	0.15383	0.424881	0.217967	0.210941	0.211173	0.133577	0.251008	0.275566	0.17622	0.596184	0.558553	0.63151	0.592081	0.517184	0.604237	0.55739	0.594925	0.631485	0.593411	0.55388	0.704921	0.637822	0.688062	0.572391
	19.5	0.127274	0.194753	0.425217	0.115128	0.344281	0.236656	0.153834	0.424526	0.218661	0.212284	0.210785	0.134011	0.250928	0.274442	0.176448	0.592982	0.55695	0.628729	0.593204	0.516	0.607137	0.558548	0.593395	0.629915	0.592291	0.554733	0.702587	0.638583	0.684187	0.570069
	19.6	0.128011	0.194272	0.424549	0.115462	0.344313	0.234101	0.154703	0.422576	0.218946	0.211439	0.209805	0.133045	0.249733	0.275779	0.17674	0.590744	0.551965	0.628127	0.589636	0.514823	0.602155	0.551731	0.591129	0.63019	0.592576	0.551858	0.700982	0.634505	0.68426	0.56903
	19.7	0.127471	0.195119	0.422144	0.115326	0.34228	0.236449	0.155103	0.422234	0.219191	0.211961	0.211415	0.133568	0.250414	0.276656	0.176138	0.590106	0.554047	0.627178	0.589899	0.513771	0.598527	0.554196	0.58995	0.629375	0.590997	0.550661	0.699473	0.630773	0.686979	0.565426
	19.8	0.127543	0.194585	0.422333	0.115628	0.341473	0.235999	0.154344	0.421461	0.219073	0.213315	0.210632	0.133357	0.251515	0.2756	0.176758	0.587936	0.553991	0.621589	0.588973	0.512274	0.601983	0.550986	0.589488	0.62918	0.589386	0.546888	0.69724	0.633145	0.680923	0.564823
	19.9	0.127937	0.194581	0.423686	0.115826	0.341864	0.239144	0.154767	0.4211	0.218671	0.212502	0.209582	0.133811	0.252256	0.277856	0.176639	0.586845	0.550327	0.623495	0.586425	0.510204	0.603153	0.549422	0.586011	0.627487	0.589138	0.548008	0.697339	0.632016	0.681678	0.563598
