# Supplementary material for: Erasable labeling of neuronal activity using a reversible calcium marker
Source: eLife. 2020 Sep 15;9:e57249. doi: 10.7554/eLife.57249 (PMC7492087; doi:10.7554/eLife.57249)
Supplement: Figure 2—figure supplement 1—source data 2. — Previously stimulated neurons were stimulated (3 × 160 stims at 80 Hz) during 20 s marking light illumination. Previously non-stimulated neurons were not stimulated during 20 s marking light illumination. [file elife-57249-fig2-figsupp1-data2.xlsx]

## Sheet: Sheet1
Figure 2 - figure supplement 1c	green-to-red ratio (AU)
	Time (min)	previously stimulated
	0	0.212362	0.176082	0.187316	0.140974	0.316052	0.283092	0.150061	0.12667	0.316767	0.200236	0.176623	0.355337	0.492284	0.150404	0.26455	0.186003	0.475337	0.284772	0.155629	0.275317	0.236853	0.215055	0.180853	0.431198	0.224902	0.503142	0.478914	0.357758	0.141093	0.144073	0.234858	0.223534	0.180309	0.13903	0.125209	0.212074	0.185782	0.252357	0.434328	0.164196	0.266678	0.236411	0.322108	0.347683	0.140413	0.174442	0.549341	0.54471
	5	0.233373	0.19746	0.209528	0.161169	0.35744	0.28743	0.170588	0.150502	0.335961	0.227171	0.190616	0.350358	0.507648	0.179508	0.274875	0.216885	0.497445	0.277753	0.189431	0.298694	0.258088	0.233399	0.228202	0.440489	0.249435	0.502449	0.454585	0.385806	0.162992	0.590929	0.248468	0.255018	0.206431	0.155586	0.138049	0.228372	0.201186	0.269586	0.444012	0.183374	0.285401	0.258641	0.336066	0.351886	0.1663	0.192832	0.557715	0.548309
	10	0.249453	0.212159	0.229299	0.178928	0.384155	0.29307	0.187855	0.168255	0.351308	0.248884	0.204129	0.356708	0.509426	0.203181	0.285903	0.237567	0.50438	0.281182	0.219298	0.309851	0.279813	0.248861	0.252355	0.442365	0.267071	0.504525	0.449816	0.404353	0.173748	0.599784	0.264998	0.269117	0.227155	0.169551	0.152261	0.239775	0.213182	0.284069	0.452599	0.202131	0.30752	0.270751	0.347614	0.361992	0.189349	0.206508	0.558931	0.549428
	15	0.262719	0.226522	0.246397	0.19416	0.403153	0.300496	0.207009	0.185627	0.367736	0.267518	0.214674	0.364522	0.513894	0.222513	0.298537	0.256791	0.503771	0.284955	0.239951	0.320613	0.288754	0.263016	0.270254	0.435187	0.285392	0.506104	0.445514	0.416251	0.183827	0.610858	0.27755	0.279218	0.242246	0.183749	0.165332	0.253362	0.222341	0.29478	0.45483	0.219446	0.324096	0.28255	0.35679	0.370005	0.20839	0.222479	0.558091	0.55411
	20	0.272684	0.240749	0.258147	0.21058	0.420811	0.304163	0.222564	0.198934	0.382564	0.281011	0.223723	0.371684	0.506242	0.239386	0.308264	0.270968	0.508814	0.289066	0.257194	0.325858	0.299426	0.273135	0.282977	0.418375	0.300034	0.509225	0.445152	0.421426	0.19185	0.610737	0.286406	0.28797	0.254942	0.196132	0.17789	0.261578	0.232013	0.303167	0.462968	0.234247	0.339523	0.292859	0.366677	0.37898	0.224188	0.234012	0.562519	0.553838
	25	0.283339	0.25875	0.272087	0.224592	0.434237	0.313483	0.236281	0.21351	0.392398	0.295908	0.229641	0.376986	0.507015	0.254863	0.320579	0.285193	0.507312	0.294606	0.271242	0.336763	0.309551	0.286649	0.292961	0.406359	0.310122	0.514105	0.448842	0.425583	0.198918	0.616754	0.29631	0.293208	0.26728	0.206908	0.189971	0.270233	0.239654	0.313473	0.464472	0.247288	0.353528	0.30055	0.374341	0.381967	0.238685	0.244413	0.569776	0.563569
	30	0.293582	0.268612	0.284288	0.237486	0.446437	0.317891	0.252136	0.226966	0.398249	0.306418	0.233749	0.383421	0.504009	0.266801	0.328671	0.298202	0.511557	0.299752	0.285509	0.344172	0.314701	0.297332	0.301852	0.406756	0.320459	0.517574	0.451903	0.434037	0.206247	0.620467	0.305466	0.302507	0.276123	0.216577	0.19991	0.279312	0.250323	0.328449	0.467732	0.259601	0.364068	0.30821	0.380386	0.391573	0.252621	0.254336	0.576807	0.563805
	35	0.302924	0.281017	0.293011	0.250829	0.454118	0.321492	0.263754	0.236251	0.407417	0.316213	0.239772	0.389574	0.504058	0.278108	0.336269	0.30427	0.510256	0.303562	0.29766	0.346686	0.322914	0.307977	0.308671	0.404617	0.333443	0.517042	0.455471	0.438838	0.212422	0.624108	0.311325	0.30713	0.28074	0.22534	0.209618	0.287082	0.255649	0.336502	0.471487	0.270653	0.373559	0.318222	0.388267	0.395206	0.262922	0.263834	0.572993	0.566541
	40	0.311507	0.292208	0.303893	0.262822	0.462765	0.327593	0.277874	0.247366	0.415055	0.328259	0.242852	0.39535	0.506889	0.286766	0.347599	0.316898	0.512872	0.307295	0.308522	0.352125	0.330168	0.316702	0.314186	0.375867	0.343228	0.520002	0.457168	0.437299	0.219856	0.622469	0.32123	0.316334	0.290832	0.232478	0.218985	0.29505	0.267856	0.349052	0.472041	0.281169	0.385577	0.325908	0.39423	0.40296	0.273728	0.274873	0.580909	0.569036
	45	0.322329	0.305405	0.306638	0.273128	0.468215	0.330239	0.287454	0.255289	0.419018	0.334936	0.248106	0.398607	0.505259	0.297093	0.354771	0.324813	0.516758	0.31396	0.318201	0.361161	0.337657	0.327337	0.319967	0.389505	0.349314	0.524685	0.465639	0.441721	0.222369	0.628055	0.326564	0.320346	0.299632	0.239687	0.228188	0.297753	0.269119	0.357551	0.469952	0.29016	0.3936	0.331089	0.399379	0.406947	0.282316	0.282604	0.5825	0.569107
	50	0.325688	0.315072	0.315524	0.284272	0.470695	0.332311	0.299629	0.265676	0.427169	0.341301	0.251091	0.402874	0.50655	0.305654	0.360275	0.332945	0.520647	0.316983	0.324968	0.362455	0.342421	0.332778	0.32451	0.389024	0.356522	0.525376	0.463097	0.446365	0.230266	0.629001	0.329403	0.324874	0.303817	0.247275	0.237324	0.306983	0.277378	0.3657	0.470416	0.298908	0.400083	0.33566	0.404665	0.4128	0.29205	0.292006	0.581329	0.569698
	55	0.330208	0.325125	0.318523	0.29362	0.473386	0.337416	0.306526	0.274069	0.433334	0.349895	0.254588	0.404781	0.495881	0.312893	0.367869	0.340669	0.52492	0.320702	0.3304	0.370937	0.345876	0.342508	0.328505	0.388862	0.363559	0.52581	0.468531	0.452727	0.237437	0.630782	0.335031	0.332388	0.312964	0.252774	0.243786	0.311504	0.285203	0.372153	0.465433	0.306808	0.404849	0.342492	0.412712	0.415828	0.300453	0.299557	0.585728	0.574308
	60	0.338463	0.333116	0.322171	0.30298	0.476866	0.338945	0.316011	0.279684	0.436273	0.354806	0.257742	0.409201	0.500792	0.317976	0.372069	0.341996	0.52108	0.323464	0.336091	0.370839	0.353289	0.348688	0.331518	0.387123	0.365439	0.527309	0.470035	0.449588	0.240943	0.63313	0.338136	0.331504	0.318306	0.257062	0.251272	0.319009	0.290442	0.382164	0.466708	0.312992	0.412392	0.342268	0.41493	0.421187	0.306351	0.306781	0.580969	0.573968
	erased	1.04237	1.14566	0.849676	1.11333	1.11764	0.963245	1.11376	1.0481	1.10671	1.0343	0.754878	0.96448	0.8138	1.00261	1.09151	1.08961	1.02185	0.939838	1.06655	0.956003	0.987258	1.05708	0.958247	0.758218	1.0667	0.983309	0.985719	0.932799	0.922805	1.10581	1.04056	1.02402	0.881464	0.827532	1.14168	1.04703	1.01672	1.05345	0.695039	1.01541	1.07862	0.995526	1.06246	1.0456	1.00349	1.09684	1.03226	1.01925
[truncated: 77 more columns]
