# Supplementary material for: Erasable labeling of neuronal activity using a reversible calcium marker
Source: eLife. 2020 Sep 15;9:e57249. doi: 10.7554/eLife.57249 (PMC7492087; doi:10.7554/eLife.57249)
Supplement: Figure 2—figure supplement 1—source data 3. [file elife-57249-fig2-figsupp1-data3.xlsx]

## Sheet: Sheet1
Figure 2 - figure supplement 1d	fluorescence (AU)
	cycle	pre-green							post-green with stimulation							post-green without stimulation							red
	1	1	1	1	1	1	1	1	0.298516	0.17687	0.227862	0.277726	0.244332	0.133741	0.304129								1	1	1	1	1	1	1
	2	0.948722	0.926293	0.943615	0.946777	0.910628	0.706633	0.875297								0.754489	0.685373	0.672547	0.650052	0.664455	0.345572	0.652814	0.999619	0.997246	0.999208	0.998009	0.995918	0.999205	0.998827
	3	0.943708	0.939021	0.945104	0.957253	0.923625	0.853564	0.918405	0.239345	0.120562	0.140444	0.192572	0.17107	0.111835	0.27744								0.996534	0.997631	0.997317	0.995516	0.990157	0.994571	0.99442
	4	0.888501	0.839274	0.864016	0.881978	0.802301	0.596336	0.810557								0.704869	0.591531	0.566401	0.548063	0.54157	0.253829	0.569318	0.990986	0.992986	0.988984	0.990235	0.987683	0.992776	0.990671
	5	0.893786	0.88501	0.901062	0.919476	0.870394	0.738677	0.873623	0.223751	0.115658	0.125399	0.156555	0.198562	0.10584	0.253636								0.987121	0.991719	0.984049	0.985805	0.98333	0.988535	0.987739
	6	0.8332	0.77553	0.790147	0.826443	0.770575	0.533649	0.765033								0.656373	0.539326	0.495638	0.474724	0.500791	0.225803	0.511566	0.981324	0.986906	0.981238	0.981585	0.977341	0.98802	0.984678
	7	0.841196	0.828266	0.854284	0.881406	0.828859	0.660016	0.827583	0.198629	0.120412	0.108302	0.145604	0.181445	0.105114	0.231189								0.975795	0.98434	0.974848	0.975567	0.969222	0.981309	0.982244
	8	0.761006	0.720706	0.714826	0.784197	0.720553	0.482316	0.718673								0.593921	0.50159	0.417242	0.429116	0.457983	0.205291	0.457122	0.970458	0.978799	0.97155	0.970777	0.966459	0.979198	0.980676
	9	0.784684	0.775244	0.802174	0.84521	0.787856	0.595016	0.797405	0.188914	0.12755	0.103327	0.124885	0.181092	0.105403	0.214045								0.96245	0.976335	0.966035	0.96725	0.962432	0.973381	0.978244
	10	0.686879	0.671617	0.656471	0.729597	0.687408	0.447559	0.677352								0.530484	0.469733	0.361154	0.370877	0.416818	0.193987	0.39636	0.958674	0.970466	0.961346	0.962701	0.961252	0.973252	0.978604
	11	0.727264	0.722998	0.753207	0.809846	0.753284	0.535404	0.753179	0.198043	0.132567	0.101377	0.11429	0.170187	0.105583	0.191594								0.950171	0.968447	0.95513	0.957347	0.956	0.969317	0.976525
	12	0.62803	0.625161	0.60007	0.677687	0.664376	0.415794	0.62885								0.486936	0.442148	0.322444	0.313336	0.401688	0.184226	0.349614	0.946592	0.964245	0.953662	0.953724	0.953531	0.969025	0.97667
	13	0.671379	0.67441	0.701825	0.771106	0.721196	0.492401	0.71845	0.201632	0.140532	0.0999044	0.109193	0.143321	0.106933	0.182908								0.937346	0.960715	0.948114	0.947703	0.948029	0.96289	0.974366
	14	0.576065	0.58128	0.55327	0.636872	0.605772	0.392539	0.597311								0.449277	0.413828	0.291349	0.29391	0.354018	0.180169	0.313889	0.934721	0.958283	0.9457	0.945395	0.944	0.963573	0.973179
	15	0.617741	0.631564	0.656096	0.734941	0.68245	0.452529	0.671668	0.2074	0.144241	0.1009	0.101295	0.207359	0.108764	0.171632								0.925282	0.952522	0.941959	0.941048	0.93975	0.959472	0.967825
	16	0.536953	0.543774	0.513895	0.596785	0.624797	0.373499	0.557519								0.423559	0.381878	0.267645	0.262409	0.381082	0.17515	0.285172	0.922199	0.950132	0.93866	0.939481	0.936552	0.960212	0.967353
	17	0.575915	0.587302	0.61317	0.699357	0.66622	0.426729	0.637645	0.211941	0.14315	0.100917	0.100608	0.236095	0.11186	0.170764								0.913825	0.944874	0.93261	0.935007	0.934853	0.955199	0.962875
	18	0.502007	0.504721	0.473386	0.567358	0.620546	0.353042	0.531645								0.399352	0.365412	0.248116	0.244441	0.378366	0.167958	0.267159	0.911667	0.942807	0.930309	0.933006	0.930498	0.954386	0.963205
	19	0.534412	0.551691	0.568172	0.665209	0.63865	0.39989	0.591993	0.205307	0.14362	0.102573	0.0911248	0.218623	0.116434	0.154578								0.902147	0.936463	0.927148	0.928575	0.928249	0.951697	0.956661
	20	0.467533	0.476296	0.443657	0.517392	0.590874	0.338518	0.482038								0.373603	0.351986	0.232795	0.20223	0.330744	0.166228	0.231649	0.899827	0.935051	0.923639	0.9254	0.925687	0.951423	0.955723
