# Supplementary material for: Erasable labeling of neuronal activity using a reversible calcium marker
Source: eLife. 2020 Sep 15;9:e57249. doi: 10.7554/eLife.57249 (PMC7492087; doi:10.7554/eLife.57249)
Supplement: Figure 2—figure supplement 2—source data 1. — No stimulations were delivered between each timepoint. [file elife-57249-fig2-figsupp2-data1.xlsx]

## Sheet: Sheet1
Figure 2 - figure supplement 2b	green-to-red ratio (AU)
	Time (min)	previously stimulated
	0	0.352625	0.360119	0.156064	0.535336	0.230597	0.13283	0.218274	0.0869221	0.128489	0.234849	0.224405	0.104304	0.478571	0.247507	0.287343	0.182848	0.153083	0.237546	0.236626	0.127461	0.177896	0.123872	0.130157	0.149623	0.342731	0.166441	0.104636	0.0958178	0.29641	0.0943356	0.486701	0.159501	0.152443	0.105612	0.151469	0.0730324	0.145785	0.148381	0.162128	0.0819227	0.0954684	0.136089	0.107321	0.0830181	0.142036	0.43339	0.132963	0.125551
	5	0.355756	0.359612	0.184782	0.550289	0.257357	0.160636	0.228995	0.12096	0.157725	0.232132	0.228015	0.132068	0.490594	0.261069	0.290836	0.193651	0.17278	0.252653	0.239115	0.154275	0.199893	0.14334	0.156832	0.172448	0.343105	0.200145	0.130034	0.123481	0.325283	0.119877	0.494619	0.175498	0.174738	0.132755	0.178095	0.0909604	0.167181	0.161403	0.182066	0.106909	0.116819	0.148333	0.129006	0.100622	0.162564	0.451199	0.155258	0.150774
	10	0.368702	0.360301	0.213046	0.554283	0.284535	0.170246	0.239887	0.140093	0.173666	0.248965	0.24146	0.149012	0.495838	0.275974	0.30024	0.213867	0.188212	0.266911	0.253364	0.169621	0.226974	0.159144	0.179996	0.188932	0.349388	0.222887	0.152408	0.138753	0.349015	0.137514	0.499532	0.188935	0.190182	0.151405	0.194963	0.10859	0.188187	0.157744	0.194635	0.11796	0.129011	0.161944	0.145623	0.113123	0.174074	0.463392	0.172235	0.169173
	15	0.382018	0.369889	0.242609	0.552561	0.305447	0.175631	0.263068	0.156122	0.195217	0.259212	0.246616	0.164909	0.497266	0.289601	0.3133	0.231444	0.205347	0.275819	0.262875	0.188178	0.250552	0.176475	0.198918	0.204765	0.362512	0.240419	0.172349	0.153758	0.360131	0.153011	0.509918	0.200334	0.201031	0.169965	0.207633	0.126403	0.203671	0.166009	0.197262	0.131059	0.140526	0.174394	0.156737	0.123403	0.186553	0.469968	0.18913	0.182045
	20	0.389675	0.38877	0.264434	0.566148	0.325161	0.186757	0.277535	0.170727	0.216725	0.270612	0.260538	0.180029	0.501327	0.305813	0.322369	0.250656	0.21595	0.287556	0.280865	0.199365	0.270595	0.191417	0.21953	0.220554	0.379133	0.25769	0.19125	0.164817	0.385454	0.171681	0.514305	0.213079	0.213792	0.182086	0.222927	0.143174	0.21716	0.170171	0.206397	0.152087	0.151772	0.188119	0.172969	0.135771	0.201058	0.476311	0.202467	0.193937
	25	0.399594	0.395581	0.284948	0.565379	0.34113	0.188159	0.283948	0.184754	0.231731	0.275634	0.266132	0.190681	0.500696	0.316972	0.3284	0.26492	0.231964	0.296122	0.286025	0.209514	0.288747	0.202936	0.235647	0.233646	0.383026	0.27512	0.208554	0.182312	0.400861	0.183877	0.525235	0.223728	0.223676	0.192892	0.230156	0.155334	0.227463	0.172918	0.213013	0.159112	0.161812	0.198163	0.179618	0.146819	0.209707	0.48632	0.215598	0.205699
	30	0.409317	0.40073	0.303341	0.564856	0.358563	0.196294	0.287082	0.196158	0.241501	0.286393	0.276377	0.203595	0.508731	0.328099	0.336184	0.280107	0.244179	0.306683	0.300551	0.228051	0.305501	0.216967	0.253127	0.247022	0.390744	0.287573	0.224229	0.189091	0.399714	0.19773	0.531799	0.23459	0.232108	0.205099	0.237992	0.170097	0.241484	0.17577	0.216732	0.166171	0.172715	0.210485	0.192179	0.156213	0.216574	0.495101	0.229963	0.218414
	35	0.412036	0.407925	0.317009	0.56449	0.372423	0.196673	0.288477	0.205645	0.254104	0.297968	0.284588	0.214145	0.516402	0.341587	0.343304	0.291455	0.255823	0.311542	0.307867	0.232871	0.321502	0.226925	0.267583	0.257873	0.399605	0.300932	0.238855	0.210144	0.412052	0.209893	0.534954	0.244505	0.239257	0.214246	0.24343	0.183034	0.251571	0.186981	0.217071	0.181263	0.182103	0.218905	0.202699	0.166286	0.225627	0.500613	0.244056	0.224316
	40	0.417044	0.409486	0.333193	0.57378	0.383171	0.202574	0.29538	0.213182	0.264546	0.302478	0.293879	0.225224	0.516365	0.346978	0.348332	0.306073	0.267027	0.32084	0.315779	0.245551	0.336186	0.237619	0.285385	0.267127	0.402207	0.315132	0.250979	0.219139	0.420948	0.220127	0.540552	0.258577	0.251101	0.221057	0.251345	0.19455	0.259908	0.187869	0.199844	0.192076	0.191818	0.228683	0.212199	0.174438	0.233208	0.508965	0.252368	0.232784
	45	0.435363	0.417634	0.343159	0.570088	0.394206	0.206009	0.312441	0.220848	0.27686	0.306186	0.305067	0.234541	0.515002	0.354998	0.355359	0.317656	0.274873	0.32594	0.322961	0.254091	0.349661	0.246344	0.293243	0.275322	0.408296	0.325623	0.260929	0.22444	0.430455	0.231895	0.54829	0.266728	0.252898	0.228314	0.257162	0.20612	0.270093	0.194147	0.159383	0.202937	0.198035	0.235972	0.215294	0.18192	0.241204	0.511775	0.263537	0.242794
	50	0.435229	0.426978	0.352917	0.570445	0.40298	0.201623	0.312197	0.2279	0.279	0.313393	0.305116	0.242792	0.517751	0.365386	0.360525	0.325334	0.286781	0.336578	0.326216	0.261956	0.36318	0.252065	0.308385	0.284391	0.414529	0.336864	0.269246	0.23604	0.4373	0.237495	0.545839	0.274044	0.258476	0.232638	0.264341	0.21759	0.27946	0.197093	0.177235	0.2119	0.208048	0.245402	0.225773	0.193305	0.245445	0.515647	0.271898	0.248872
	55	0.437226	0.416783	0.364116	0.577014	0.40973	0.205872	0.320348	0.235581	0.288142	0.3165	0.3186	0.24633	0.517549	0.371137	0.365432	0.334042	0.29092	0.333262	0.328874	0.270271	0.375271	0.260696	0.32011	0.292069	0.428289	0.346274	0.278089	0.245927	0.443015	0.248125	0.552712	0.281635	0.265571	0.238004	0.269796	0.227992	0.285066	0.21015	0.173749	0.221462	0.214145	0.251969	0.235825	0.201357	0.246536	0.520612	0.280746	0.253426
	60	0.44098	0.416073	0.373292	0.58406	0.415944	0.13911	0.315501	0.242152	0.292746	0.323801	0.320147	0.254586	0.518299	0.376616	0.368645	0.341701	0.299985	0.339326	0.340475	0.274331	0.385968	0.267249	0.326069	0.301461	0.428197	0.35605	0.285825	0.255714	0.439926	0.25587	0.559605	0.287571	0.273591	0.24104	0.277373	0.23857	0.293469	0.212196	0.165565	0.228399	0.223211	0.255861	0.240349	0.204494	0.253624	0.52315	0.285856	0.258882
	erased	1.07961	1.00906	1.16311	0.989843	1.14438	0.352617	0.958449	0.876595	0.898347	0.979378	0.982564	1.05012	0.927982	1.0983	0.994192	1.04773	1.05473	0.942275	0.988664	1.05756	1.24878	1.07978	1.14607	1.08741	1.01763	1.06739	1.04733	1.08694	1.12053	1.01747	1.06833	1.00619	0.881579	0.889506	0.890835	0.976101	1.05747	0.857073	0.43473	1.01915	1.01076	0.932974	0.969675	1.0856	0.956959	1.0473	1.03635	0.86965
[truncated: 84 more columns]
