# Supplementary material for: Erasable labeling of neuronal activity using a reversible calcium marker
Source: eLife. 2020 Sep 15;9:e57249. doi: 10.7554/eLife.57249 (PMC7492087; doi:10.7554/eLife.57249)
Supplement: Figure 2—figure supplement 4—source data 1. [file elife-57249-fig2-figsupp4-data1.xlsx]

## Sheet: Sheet1
Figure 2 - figure supplement 4b	log(red/green)
	-channelrhodopsin	+channelrhodopsin
	0.336219	0.891347		Cycle 1
	0.164751	0.535089		Cycle 2
	0.080022	0.609054		Cycle 3
	0.085695	0.769446
	0.158902	0.605741
	0.137436	0.895972
	0.190621	0.530625
	0.110768	1.10642
	0.14188	0.864605
	0.137757	0.715047
	0.194385	0.841959
	0.163908	0.695934
	0.094054	0.793293
	0.138102	0.82181
	0.208363	0.541943
	0.10347	0.820005
	0.198627	0.796691
	0.020442	0.723996
	0.134981	0.93387
	0.167863	0.095292
	0.102023	0.626208
	0.184872	0.832373
	0.218428	1.05978
	0.177457	0.780987
	0.137684	0.928659
	0.140751	0.956089
	0.105888	0.949389
	0.217471	0.453934
	0.150159	0.842549
	0.199353	0.996283
	0.181048	0.331593
	0.0791	0.618092
	0.068659	0.785564
	0.158061	0.53607
	0.161065	0.20641
	0.081441	0.156138
	0.11865	0.076219
	0.168604	0.915543
	0.148168	0.676384
	0.133408	0.461274
	0.153455	1.06681
	0.062636	1.00307
	0.147697	0.836196
	0.720651	0.556795
	0.132793	0.6089
	0.129056	0.749943
	0.173165	0.634782
	0.121208	0.892529
	0.127654	0.47933
	0.165488	1.10562
	0.060917	0.84315
	0.140852	0.705066
	0.103318	0.872724
	0.114026	0.707156
	0.104488	0.766833
	0.075642	0.809932
	0.115441	0.54158
	0.122199	0.800611
	0.108656	0.759737
	0.076435	0.691238
	0.174597	0.953205
	0.130272	0.104641
	0.075506	0.624399
	0.130898	0.869485
	0.080804	1.02635
	0.126635	0.756568
	0.308568	0.865915
	0.294526	1.05725
	0.142554	0.946677
	0.268823	0.474442
	0.103393	0.833104
	0.134935	0.951129
	0.111136	0.317183
	0.117852	0.646757
	0.138192	0.761401
	0.179124	0.53899
	0.122098	0.203983
	0.133804	0.162868
	0.118052	0.080571
	0.353204	0.884853
	0.169328	0.62693
	0.084801	0.503034
	0.090972	1.08136
	0.160883	0.990969
	0.141494	0.837761
	0.196134	0.571281
	0.113421	0.60433
	0.145073	0.753739
	0.139636	0.63668
	0.203751	0.887404
	0.173003	0.496588
	0.096708	1.07474
	0.142912	0.851439
	0.21292	0.687282
	0.108321	0.883792
	0.203303	0.726487
	0.016473	0.790255
	0.143101	0.816407
	0.169694	0.548776
	0.107931	0.78588
	0.188175	0.770749
	0.22425	0.713411
	0.179094	0.99531
	0.142496	0.10211
	0.140496	0.615964
	0.1101	0.888344
	0.217741	1.02458
	0.153346	0.757762
	0.204409	0.827371
	0.181332	1.08394
	0.078208	0.936927
	0.074192	0.453422
	0.160276	0.826617
	0.166289	0.930411
	0.089774	0.309192
	0.124087	0.645534
	0.170819	0.755942
	0.157746	0.527274
	0.140312	0.211662
	0.157479	0.168184
	0.066993	0.086065
	0.150313	0.883582
	0.816169	0.580623
	0.139014	0.532712
	0.135943	1.0856
	0.175967	0.989446
	0.124389
	0.137592
	0.170275
	0.067592
	0.148279
	0.109238
	0.112606
	0.108668
	0.078272
	0.120606
	0.129184
	0.114881
	0.082713
	0.176372
	0.135685
	0.076941
	0.138519
	0.092884
	0.134681
	0.308203
	0.333078
	0.148934
	0.272907
	0.114444
	0.139515
	0.115432
	0.121376
	0.148536
	0.186229
	0.122777
	0.140353
	0.122183
	0.338165
	0.174793
	0.089225
	0.096705
	0.165868
	0.144851
	0.202799
	0.120779
	0.152633
	0.148839
	0.206654
	0.186536
	0.106793
	0.142784
	0.215844
	0.106863
	0.206067
	0.027276
	0.144439
	0.172952
	0.114355
	0.19762
	0.232409
	0.182964
	0.145516
	0.147303
	0.107701
	0.220269
	0.154032
	0.209901
	0.187039
	0.080284
	0.079182
	0.165424
	0.168112
	0.091545
	0.125992
	0.174519
	0.158452
	0.14287
	0.159739
	0.072814
	0.152425
	0.799759
	0.149078
	0.133641
	0.18589
	0.12587
	0.140438
	0.176299
	0.070532
	0.153121
	0.114085
	0.121561
	0.116573
	0.086089
	0.126658
	0.128832
	0.119159
	0.085847
	0.183001
	0.139209
	0.08423
	0.141249
	0.095139
	0.142166
	0.31247
	0.349333
	0.147428
	0.269181
	0.120737
	0.1435
	0.114674
	0.120681
	0.154238
	0.189356
	0.128075
	0.137265
	0.126005
