# Supplementary material for: Erasable labeling of neuronal activity using a reversible calcium marker
Source: eLife. 2020 Sep 15;9:e57249. doi: 10.7554/eLife.57249 (PMC7492087; doi:10.7554/eLife.57249)
Supplement: Figure 2—figure supplement 4—source data 2. [file elife-57249-fig2-figsupp4-data2.xlsx]

## Sheet: Sheet1
Figure 2 - figure supplement 4c	relationship between log(red/green) and ΔF/F
	log(red/green)	ΔF/F
	0.336219	0.476022		Cycle 1
	0.164751	0.313471		Cycle 2
	0.080022	0.281194		Cycle 3
	0.085695	0.266365
	0.158902	0.322024
	0.137436	0.319137
	0.190621	0.295846
	0.110768	0.282247
	0.14188	0.281003
	0.137757	0.25519
	0.194385	0.279167
	0.163908	0.296999
	0.094054	0.326828
	0.138102	0.315568
	0.208363	0.276393
	0.10347	0.312717
	0.198627	0.285219
	0.020442	0.212906
	0.134981	0.33361
	0.167863	0.245597
	0.102023	0.329613
	0.184872	0.240575
	0.218428	0.30365
	0.177457	0.23579
	0.137684	0.286191
	0.140751	0.287348
	0.105888	0.284385
	0.217471	0.26486
	0.150159	0.282937
	0.199353	0.254644
	0.181048	0.27406
	0.0791	0.281373
	0.068659	0.247417
	0.158061	0.278869
	0.161065	0.299149
	0.081441	0.294221
	0.11865	0.315205
	0.168604	0.309551
	0.148168	0.279728
	0.133408	0.319772
	0.153455	0.251739
	0.062636	0.281902
	0.147697	0.243078
	0.720651	0.636837
	0.132793	0.27811
	0.129056	0.303204
	0.173165	0.328934
	0.121208	0.291837
	0.127654	0.295793
	0.165488	0.316388
	0.060917	0.303177
	0.140852	0.295574
	0.103318	0.303737
	0.114026	0.317351
	0.104488	0.319368
	0.075642	0.261505
	0.115441	0.222655
	0.122199	0.275965
	0.108656	0.288476
	0.076435	0.280146
	0.174597	0.265638
	0.130272	0.325809
	0.075506	0.24676
	0.130898	0.317231
	0.080804	0.252876
	0.126635	0.297789
	0.308568	0.302131
	0.294526	0.443252
	0.142554	0.30078
	0.268823	0.232453
	0.103393	0.258012
	0.134935	0.300428
	0.111136	0.220294
	0.117852	0.271274
	0.138192	0.260638
	0.179124	0.298038
	0.122098	0.28739
	0.133804	0.308399
	0.118052	0.313427
	0.353204	0.455017
	0.169328	0.322512
	0.084801	0.284094
	0.090972	0.275344
	0.160883	0.326262
	0.141494	0.320526
	0.196134	0.29732
	0.113421	0.28214
	0.145073	0.286964
	0.139636	0.253105
	0.203751	0.283984
	0.173003	0.295252
	0.096708	0.318977
	0.142912	0.324881
	0.21292	0.275829
	0.108321	0.316645
	0.203303	0.281235
	0.016473	0.196749
	0.143101	0.342196
	0.169694	0.247015
	0.107931	0.337776
	0.188175	0.241152
	0.22425	0.30856
	0.179094	0.234499
	0.142496	0.294558
	0.140496	0.28198
	0.1101	0.291513
	0.217741	0.260271
	0.153346	0.278389
	0.204409	0.254476
	0.181332	0.270837
	0.078208	0.278647
	0.074192	0.262379
	0.160276	0.273988
	0.166289	0.300376
	0.089774	0.303783
	0.124087	0.322494
	0.170819	0.311999
	0.157746	0.286251
	0.140312	0.319616
	0.157479	0.256848
	0.066993	0.288928
	0.150313	0.250847
	0.816169	0.72164
	0.139014	0.283733
	0.135943	0.30872
	0.175967	0.327712
	0.124389	0.282611
	0.137592	0.30166
	0.170275	0.321208
	0.067592	0.307928
	0.148279	0.305749
	0.109238	0.309974
	0.112606	0.312134
	0.108668	0.320761
	0.078272	0.26474
	0.120606	0.225849
	0.129184	0.290033
	0.114881	0.287778
	0.082713	0.279232
	0.176372	0.270298
	0.135685	0.328189
	0.076941	0.251624
	0.138519	0.318344
	0.092884	0.264557
	0.134681	0.300582
	0.308203	0.290469
	0.333078	0.46119
	0.148934	0.301308
	0.272907	0.239569
	0.114444	0.261241
	0.139515	0.302314
	0.115432	0.215567
	0.121376	0.27656
	0.148536	0.266523
	0.186229	0.300215
	0.122777	0.283689
	0.140353	0.315148
	0.122183	0.320731
	0.338165	0.431204
	0.174793	0.316514
	0.089225	0.285253
	0.096705	0.279502
	0.165868	0.319912
	0.144851	0.31593
	0.202799	0.304978
	0.120779	0.290355
	0.152633	0.289558
	0.148839	0.26302
	0.206654	0.289873
	0.186536	0.310241
	0.106793	0.325626
	0.142784	0.321864
	0.215844	0.26709
	0.106863	0.318079
	0.206067	0.280912
	0.027276	0.202093
	0.144439	0.340726
	0.172952	0.246742
	0.114355	0.335248
	0.19762	0.252786
	0.232409	0.322076
	0.182964	0.246655
	0.145516	0.296288
	0.147303	0.290174
	0.107701	0.284003
	0.220269	0.258104
	0.154032	0.289189
	0.209901	0.262482
	0.187039	0.264805
	0.080284	0.273054
	0.079182	0.259297
	0.165424	0.274348
	0.168112	0.295999
	0.091545	0.298778
	0.125992	0.319247
	0.174519	0.313131
	0.158452	0.282176
	0.14287	0.318334
	0.159739	0.244562
	0.072814	0.291409
	0.152425	0.248686
	0.799759	0.71682
	0.149078	0.285085
	0.133641	0.304237
	0.18589	0.336932
	0.12587	0.287921
	0.140438	0.294896
	0.176299	0.326769
	0.070532	0.312511
	0.153121	0.302352
	0.114085	0.306261
	0.121561	0.331573
	0.116573	0.322623
	0.086089	0.259502
	0.126658	0.238977
	0.128832	0.277679
	0.119159	0.289575
	0.085847	0.285418
	0.183001	0.26936
	0.139209	0.327569
	0.08423	0.25453
	0.141249	0.31816
	0.095139	0.270826
	0.142166	0.303126
	0.31247	0.297112
	0.349333	0.471668
	0.147428	0.303396
	0.269181	0.231411
	0.120737	0.263466
	0.1435	0.302285
	0.114674	0.216716
	0.120681	0.266371
	0.154238	0.260023
	0.189356	0.303962
	0.128075	0.289104
	0.137265	0.310009
	0.126005	0.322926
	0.891347	0.753725
	0.535089	0.448147
	0.609054	0.640037
	0.769446	0.660734
	0.605741	0.545742
	0.895972	0.801512
	0.530625	0.409124
	1.10642	0.816831
	0.864605	0.713598
	0.715047	0.703926
	0.841959	0.678466
	0.695934	0.641927
	0.793293	0.779067
	0.82181	0.748355
	0.541943	0.551239
	0.820005	0.646915
	0.796691	0.610316
	0.723996	0.638717
	0.93387	0.845213
	0.095292	0.316293
	0.626208	0.693553
	0.832373	0.797788
	1.05978	0.869317
	0.780987	0.747402
	0.928659	0.781913
	0.956089	0.793287
	0.949389	0.843941
	0.453934	0.648574
	0.842549	0.676125
	0.996283	0.820362
	0.331593	0.405278
	0.618092	0.518236
	0.785564	0.711426
	0.53607	0.595412
	0.20641	0.298747
	0.156138	0.306584
	0.076219	0.316338
	0.915543	0.764878
	0.676384	0.699874
	0.461274	0.386908
	1.06681	0.872645
	1.00307	0.887513
	0.836196	0.695876
	0.556795	0.484515
	0.6089	0.633387
	0.749943	0.658775
	0.634782	0.606337
	0.892529	0.806478
	0.47933	0.379534
	1.10562	0.82192
	0.84315	0.725541
	0.705066	0.68493
	0.872724	0.728827
	0.707156	0.668248
	0.766833	0.778202
	0.809932	0.729096
	0.54158	0.565217
	0.800611	0.642351
	0.759737	0.60456
	0.691238	0.638966
	0.953205	0.841162
	0.104641	0.321832
	0.624399	0.677959
	0.869485	0.815044
	1.02635	0.844161
	0.756568	0.733358
	0.865915	0.724384
	1.05725	0.835003
	0.946677	0.84582
	0.474442	0.645771
	0.833104	0.694482
	0.951129	0.787302
	0.317183	0.369061
	0.646757	0.580288
	0.761401	0.666413
	0.53899	0.5818
	0.203983	0.296777
	0.162868	0.31696
	0.080571	0.316323
	0.884853	0.743406
	0.62693	0.633409
	0.503034	0.453509
	1.08136	0.872663
	0.990969	0.884182
	0.837761	0.701152
	0.571281	0.500037
	0.60433	0.626439
	0.753739	0.648766
	0.63668	0.608344
	0.887404	0.799736
	0.496588	0.39784
	1.07474	0.805151
	0.851439	0.724582
	0.687282	0.668922
	0.883792	0.735629
	0.726487	0.677609
	0.790255	0.783977
	0.816407	0.726793
	0.548776	0.5631
	0.78588	0.632006
	0.770749	0.606233
	0.713411	0.647116
	0.99531	0.849575
	0.10211	0.315968
	0.615964	0.667506
	0.888344	0.821295
	1.02458	0.841705
	0.757762	0.732231
	0.827371	0.696301
	1.08394	0.844689
	0.936927	0.8393
	0.453422	0.617898
	0.826617	0.691303
	0.930411	0.770429
	0.309192	0.343515
	0.645534	0.575388
	0.755942	0.658289
	0.527274	0.564516
	0.211662	0.304797
	0.168184	0.308501
	0.086065	0.325216
	0.883582	0.739175
	0.580623	0.573699
	0.532712	0.500832
	1.0856	0.875338
	0.989446	0.884512
