# Supplementary material for: Erasable labeling of neuronal activity using a reversible calcium marker
Source: eLife. 2020 Sep 15;9:e57249. doi: 10.7554/eLife.57249 (PMC7492087; doi:10.7554/eLife.57249)
Supplement: Figure 2—source data 1. [file elife-57249-fig2-data1.xlsx]

## Sheet: Sheet1
Figure 2b	ΔF/F
	0 Hz	5 Hz	10 Hz	20 Hz	40 Hz	80 Hz
	0.0178516	0.028239	0.0300188	0.0468626	0.0666756	0.0761394
	0.0318222	0.0583958	0.0804345	0.131858	0.178789	0.170154
	0.0579022	0.0563187	0.07197	0.0827025	0.116603	0.158219
	0.0483354	0.0627875	0.0803512	0.13326	0.324371	0.452535
	0.0381608	0.051224	0.0597691	0.0879318	0.174047	0.319663
	0.0568204	0.0813308	0.0918755	0.146359	0.30393	0.48541
	0.0414831	0.0505213	0.0684132	0.100949	0.228449	0.429947
	0.0396882	0.0500371	0.0504807	0.0659418	0.130899	0.193221
	0.0513272	0.0785533	0.096753	0.145684	0.322102	0.283909
	0.0460643	0.0701807	0.097558	0.126239	0.380724	0.505692
	0.0468139	0.0526121	0.0719241	0.113566	0.267119	0.36696
	0.0642928	0.0801982	0.0887943	0.163861	0.366406	0.378928
	0.0402668	0.0502623	0.0513162	0.0668638	0.134276	0.196628
	0.047635	0.0533986	0.0614297	0.0812995	0.134387	0.281133
	0.0481876	0.053857	0.0649106	0.0730948	0.0919673	0.26431
	0.0598287	0.0837025	0.126262	0.247883	0.469125	0.580836
	0.0532491	0.0657331	0.0853337	0.125013	0.274817	0.455129
	0.0494988	0.0572376	0.0573223	0.0576096	0.0729574	0.0757816
	0.0481493	0.0578818	0.0724578	0.111293	0.14182	0.159539
	0.0547837	0.0474191	0.0548538	0.0622021	0.188353	0.374629
	0.0506613	0.0546881	0.0503943	0.0542224	0.0585166	0.0739574
	0.0548605	0.0736932	0.0979149	0.159809	0.385331	0.468558
	0.0554379	0.0618088	0.090389	0.131054	0.260242	0.364439
	0.0458089	0.0305718	0.043804	0.0642522	0.09278	0.232234
	0.0559491	0.0545725	0.0580532	0.0583296	0.067165	0.0857616
	0.0635957	0.0505144	0.0514886	0.0533047	0.0658906	0.0890155
	0.055684	0.0588735	0.0666382	0.0687848	0.0800692	0.095458
	0.0661012	0.0785324	0.0889884	0.10284	0.276819	0.374538
	0.0492769	0.063284	0.0489228	0.12389	0.392234	0.501612
	0.0218337	0.0576969	0.0475639	0.0507989	0.090275	0.121321
	0.0471044	0.0586486	0.070952	0.0916204	0.188192	0.180838
	0.0457114	0.0553609	0.0730202	0.141855	0.174794	0.102621
	0.0415154	0.0453987	0.0530793	0.079782	0.110313	0.169323
	0.0537559	0.0589747	0.0648038	0.0805113	0.0910737	0.11081
	0.0352037	0.078727	0.113154	0.177422	0.261486	0.284042
	0.0341132	0.0664246	0.121725	0.23793	0.421965	0.417513
	0.0326713	0.101817	0.175629	0.272896	0.396572	0.437429
	0.0214777	0.0318617	0.128769	0.231031	0.397959	0.427258
	0.0566013	0.0786862	0.122835	0.243423	0.411855	0.45263
	0.0387566	0.0917513	0.15581	0.259904	0.38585	0.458049
	0.0507094	0.0981699	0.121299	0.1877	0.317668	0.36027
	0.0415596	0.107371	0.180758	0.317528	0.392361	0.42549
	0.0508536	0.0996186	0.154292	0.258049	0.395446	0.486515
	0.0562658	0.0459546	0.0393492	0.0772838	0.167055	0.147861
	0.0371478	0.112926	0.190274	0.296156	0.354333	0.379912
	0.0536441	0.109056	0.1699	0.309749	0.447917	0.438951
	0.0658702	0.0756335	0.139261	0.265904	0.406792	0.427394
	0.0471113	0.137593	0.20755	0.255188	0.389139	0.480677
	0.0478098	0.0766822	0.113355	0.202149	0.376042	0.465852
	0.0421733	0.144013	0.24253	0.36606	0.424692	0.444421
	0.0461703	0.100298	0.103836	0.124687	0.188193	0.259692
	0.0561229	0.0966131	0.159228	0.281172	0.415406	0.38456
	0.0455121	0.0877122	0.141683	0.258026	0.39846	0.29913
	0.0382223	0.15004	0.182231	0.253068	0.397977	0.451304
	0.0384099	0.142945	0.236181	0.335153	0.436645	0.474548
	0.0388175	0.1138	0.188292	0.292892	0.407776	0.395247
	0.0471019	0.132299	0.158127	0.259645	0.398273	0.416483
	0.0493043	0.0729748	0.112546	0.209446	0.366792	0.326956
	0.0365063	0.0716323	0.11222	0.19316	0.327867	0.397555
	0.0387296	0.0403156	0.0460982	0.0738473	0.153839	0.24643
	0.0363146	0.118077	0.187181	0.292641	0.400423	0.436534
	0.0372788	0.106019	0.190314	0.2057	0.27086	0.279366
	0.0261602	0.0712473	0.137736	0.202123	0.263722	0.293589
	0.0376918	0.0302835	0.0118374	0.0170248	0.0178979	0.114914
	0.0508564	0.110794	0.184479	0.289664	0.406091	0.432889
	0.0399862	0.0903327	0.127998	0.249828	0.421769	0.498694
	0.049244	0.104265	0.165832	0.214998	0.23255	0.322845
	0.053658	0.0862139	0.12746	0.246845	0.456801	0.467061
	0.0520142	0.0528402	0.0660433	0.0764125	0.139477	0.411455
	0.0550425	0.065735	0.0867046	0.140717	0.274304	0.282742
	0.0422914	0.0807157	0.132274	0.227878	0.357101	0.46439
	0.0461229	0.0555959	0.0590903	0.064467	0.0959887	0.204446
	0.0481332	0.0654428	0.0679886	0.0989176	0.327821	0.180926
	0.051416	0.0608808	0.0840929	0.156715	0.327478	0.317321
	0.0424797	0.0351419	0.0423889	0.0638183	0.0610977	0.0743845
	0.0347264	0.0643742	0.0610416	0.101203	0.14572	0.255881
	0.0585901	0.110964	0.191415	0.302682	0.413874	0.395224
	0.0433952	0.0786638	0.139465	0.229944	0.396621	0.519918
	0.0513902	0.0717839	0.0891978	0.143621	0.264375	0.400563
	0.0493755	0.08147	0.212502	0.463582	0.541903	0.516546
	0.0511487	0.0781683	0.115096	0.199411	0.474402	0.473325
	0.0553661	0.079126	0.119004	0.173551	0.355558	0.472993
	0.055297	0.0794389	0.114697	0.189064	0.313577	0.455313
	0.0479873	0.085463	0.128722	0.272497	0.453526	0.541359
	0.0535149	0.0732365	0.142226	0.303547	0.548955	0.59029
	0.0556482	0.0968753	0.152412	0.284486	0.484867	0.572462
	0.0283825	0.0738552	0.0928989	0.161895	0.322087	0.391193
	0.0560466	0.0816803	0.124835	0.245258	0.473671	0.525057
	0.0391281	0.0687451	0.0879945	0.0924706	0.112589	0.147084
	0.0558415	0.0865517	0.129929	0.207693	0.313407	0.437747
	0.0317748	0.105314	0.167569	0.307352	0.449857	0.503412
	0.0419438	0.0709299	0.0641739	0.0964388	0.155617	0.280051
	0.0411339	0.069232	0.0919434	0.144807	0.25343	0.271406
	0.0429047	0.0623795	0.0890833	0.139173	0.231932	0.250896
	0.0447683	0.0695275	0.116947	0.143556	0.434298	0.440514
	0.0580964	0.104292	0.0956253	0.168557	0.44057	0.56098
	0.0513449	0.0604236	0.0839792	0.107098	0.147387	0.148428
	0.0539142	0.0599484	0.0827916	0.0935533	0.131993	0.418818
	0.0273692	0.0592392	0.0700417	0.153613	0.301404	0.407721
	0.048066	0.117743	0.111182	0.324276	0.457074	0.416633
	0.0474922	0.115882	0.176044	0.29898	0.484773	0.506925
	0.0492187	0.0633971	0.0717651	0.115386	0.284929	0.275091
	0.0418144	0.063763	0.0937731	0.159839	0.325369	0.413399
	0.0550069	0.063233	0.0702606	0.10564	0.197935	0.429179
	0.0512929	0.0752412	0.118501	0.174111	0.374975	0.469688
	0.047073	0.0648606	0.0788825	0.106799	0.128871	0.195046
	0.0482965	0.0491195	0.0595499	0.0661978	0.0779117	0.102333
	0.046441	0.0658682	0.0716107	0.0974842	0.178505	0.356118
	0.0572868	0.0630563	0.0737322	0.0984032	0.268589	0.382483
	0.0470132	0.0728991	0.0842123	0.179771	0.398229	0.485736
	0.022621	0.0467444	0.0833388	0.195367	0.153473	0.133131
	0.067542	0.0713365	0.110556	0.0685438	0.100536	0.128174
	0.0441657	0.0754993	0.0746583	0.0957756	0.297346	0.435688
	0.041659	0.0767692	0.110582	0.195159	0.222329	0.206696
	0.0485053	0.0543056	0.0606708	0.067977	0.0932842	0.114557
	0.0491354	0.128767	0.209238	0.336014	0.512496	0.524467
	0.0456233	0.0381843	0.0560785	0.0532893	0.0623078	0.0798351
	0.0378029	0.0526041	0.0770398	0.158722	0.168673	0.181041
	0.0468946	0.0759321	0.0984045	0.0984967	0.168379	0.247256
