# Supplementary material for: Erasable labeling of neuronal activity using a reversible calcium marker
Source: eLife. 2020 Sep 15;9:e57249. doi: 10.7554/eLife.57249 (PMC7492087; doi:10.7554/eLife.57249)
Supplement: Figure 2—source data 2. [file elife-57249-fig2-data2.xlsx]

## Sheet: Sheet1
Figure 2c	normalized fluorescence intensity (AU)
	Time (s)	with stimulation															without stimulation
	0.1	1	1	1	1	1	1	1	1	1	1	1	1	1	1	1	1	1	1	1	1	1	1	1	1	1	1	1	1	1	1
	0.2	0.995783	0.997561	1.00065	0.996183	0.999911	0.998889	1.00069	0.993915	0.993486	0.995282	0.992376	0.99573	0.99187	0.989233	0.993196	0.995242	0.997512	0.997401	0.995848	0.997014	0.992718	1.00428	0.997934	0.993425	1.00276	0.997199	0.994307	0.994324	0.998487	0.99774
	0.3	0.993417	0.99436	1.00041	0.989244	0.990804	0.991458	1.00013	0.991927	0.99398	0.993174	0.992635	0.992331	0.987878	0.98699	0.992139	0.99184	0.995206	0.995234	0.98964	0.992002	0.995175	0.999498	0.993648	0.997355	0.995977	0.991135	0.992524	0.994374	0.989432	0.99739
	0.4	0.990833	0.992184	0.990444	0.987295	0.987926	0.99006	0.991692	0.98574	0.995418	0.991604	0.989246	0.989085	0.984386	0.985631	0.988336	0.98812	0.994834	0.98723	0.985845	0.985772	0.985632	0.990002	0.98946	0.993384	0.996754	0.987243	0.987672	0.988184	0.98627	0.991983
	0.5	0.98681	0.986669	0.99304	0.982122	0.982576	0.981845	0.98715	0.979607	0.990509	0.985333	0.983298	0.984669	0.985795	0.979725	0.989634	0.984247	0.982355	0.983147	0.982178	0.986003	0.982098	0.992199	0.98582	0.986094	0.9888	0.986354	0.983831	0.97817	0.983117	0.992792
	0.6	0.980437	0.980085	0.985085	0.976781	0.978748	0.980264	0.985646	0.97916	0.985768	0.985318	0.980094	0.981002	0.975033	0.9798	0.98442	0.979815	0.984653	0.980436	0.979657	0.979089	0.983322	0.983537	0.982576	0.986717	0.989234	0.981079	0.980927	0.9806	0.980711	0.986784
	0.7	0.977276	0.980738	0.982617	0.97325	0.976869	0.97762	0.982627	0.976483	0.98591	0.981628	0.975909	0.977379	0.975467	0.976798	0.981574	0.976753	0.978213	0.979729	0.976297	0.976599	0.97832	0.9801	0.980309	0.98523	0.983218	0.975123	0.97739	0.973595	0.976767	0.982181
	0.8	0.975687	0.974918	0.976505	0.972531	0.972253	0.975251	0.980997	0.973598	0.98032	0.976993	0.972633	0.974845	0.968195	0.969699	0.976667	0.972405	0.97464	0.970473	0.972106	0.969809	0.969845	0.978463	0.973629	0.982888	0.982607	0.973459	0.975504	0.972137	0.977261	0.980439
	0.9	0.968112	0.973111	0.97524	0.969029	0.968335	0.971169	0.974666	0.96937	0.982237	0.974932	0.970397	0.972181	0.966642	0.972745	0.979129	0.968655	0.973033	0.968949	0.967914	0.969202	0.97067	0.975018	0.971756	0.974541	0.976692	0.971901	0.971243	0.968682	0.972678	0.975864
	1	0.967383	0.967674	0.972758	0.963279	0.966354	0.973661	0.975087	0.962449	0.97511	0.970752	0.967869	0.968163	0.962057	0.96911	0.976285	0.967737	0.970705	0.963127	0.96545	0.966721	0.964879	0.971082	0.966944	0.982192	0.976567	0.967554	0.967192	0.961263	0.968838	0.974031
	1.1	0.963033	0.963498	0.967904	0.959594	0.962701	0.966714	0.966577	0.959707	0.977993	0.966277	0.964275	0.964462	0.955059	0.966502	0.971888	0.964457	0.967535	0.961863	0.959552	0.962309	0.961504	0.972256	0.963947	0.972459	0.973279	0.964059	0.965975	0.960028	0.966435	0.974031
	1.2	0.961484	0.962129	0.969162	0.957979	0.96138	0.964235	0.965801	0.956696	0.971891	0.965364	0.959319	0.962695	0.952457	0.963658	0.969668	0.961647	0.96167	0.958953	0.957721	0.959007	0.958604	0.964499	0.961203	0.975919	0.96935	0.962132	0.961047	0.955206	0.962251	0.974179
	1.3	0.958777	0.957376	0.963351	0.953987	0.955935	0.956978	0.959179	0.953983	0.976499	0.964536	0.955901	0.960011	0.951495	0.960356	0.966974	0.957189	0.958353	0.954265	0.955135	0.956331	0.960693	0.956627	0.955707	0.969166	0.96401	0.956507	0.95969	0.955328	0.958123	0.965436
	1.4	0.953798	0.95683	0.955854	0.951308	0.95362	0.95822	0.956317	0.950779	0.965278	0.962352	0.951043	0.955684	0.948961	0.952545	0.967214	0.954894	0.955983	0.951469	0.948545	0.953786	0.955593	0.958898	0.953746	0.965898	0.962713	0.953563	0.954497	0.948138	0.954971	0.960696
	1.5	0.952645	0.951516	0.95275	0.948302	0.95066	0.954034	0.953516	0.949276	0.97107	0.961034	0.948774	0.953043	0.950096	0.961209	0.958606	0.948935	0.952274	0.948567	0.948276	0.951347	0.950063	0.955763	0.950445	0.966572	0.960147	0.950462	0.951965	0.94891	0.956632	0.963646
	1.6	0.947038	0.949289	0.947997	0.946311	0.946504	0.948838	0.951439	0.94294	0.960932	0.956569	0.942608	0.951131	0.947425	0.955414	0.957273	0.947476	0.948124	0.944704	0.944864	0.947468	0.945557	0.952282	0.945631	0.964361	0.958148	0.949462	0.948742	0.948147	0.953035	0.958058
	1.7	0.943828	0.942366	0.946785	0.94077	0.945136	0.945645	0.949652	0.941437	0.959838	0.949968	0.945076	0.946025	0.942869	0.946454	0.95254	0.944669	0.945522	0.945677	0.94057	0.944252	0.939819	0.947559	0.943533	0.964341	0.953006	0.944072	0.944995	0.944256	0.94753	0.95668
	1.8	0.940452	0.942259	0.943516	0.938268	0.938735	0.941873	0.946729	0.934285	0.962514	0.94925	0.938924	0.94357	0.934886	0.94783	0.947963	0.939497	0.946211	0.940573	0.9379	0.938671	0.939079	0.946558	0.936819	0.962902	0.95225	0.941212	0.941939	0.938646	0.950184	0.954367
	1.9	0.93788	0.941116	0.944112	0.935047	0.936941	0.938689	0.943912	0.92978	0.96271	0.946515	0.935134	0.941003	0.93652	0.944015	0.950966	0.938797	0.939233	0.936295	0.934518	0.936009	0.933824	0.943464	0.934771	0.962393	0.948441	0.939096	0.938997	0.938771	0.942689	0.955231
	2	0.93102	0.92921	0.918362	0.925055	0.927894	0.891569	0.930711	0.922488	0.951535	0.937549	0.930412	0.935233	0.928377	0.936836	0.942535	0.935102	0.934135	0.93457	0.9328	0.932955	0.930525	0.943272	0.931087	0.961719	0.945528	0.93344	0.936806	0.930862	0.943808	0.949534
	2.1	0.922935	0.878755	0.8515	0.902755	0.908857	0.805796	0.874647	0.908244	0.935871	0.903052	0.920252	0.924523	0.897537	0.902775	0.908477	0.928771	0.93747	0.930626	0.927239	0.931661	0.929159	0.937295	0.926995	0.955637	0.94308	0.933027	0.933215	0.92801	0.939103	0.947068
	2.2	0.909563	0.816748	0.812591	0.872606	0.888433	0.759529	0.814386	0.895242	0.919682	0.878535	0.911182	0.913975	0.86503	0.858438	0.876103	0.92634	0.933436	0.927792	0.924855	0.928881	0.92201	0.934048	0.924523	0.953116	0.941302	0.927164	0.930906	0.925833	0.937622	0.948635
	2.3	0.896107	0.764547	0.791032	0.84152	0.872619	0.72653	0.765254	0.885346	0.900729	0.852626	0.903796	0.901542	0.846057	0.80233	0.850551	0.923363	0.928186	0.92817	0.919146	0.924735	0.923154	0.931307	0.923368	0.949896	0.938633	0.92345	0.928493	0.92178	0.940323	0.946078
	2.4	0.878751	0.725253	0.780742	0.81018	0.857772	0.69624	0.721502	0.873517	0.891877	0.834353	0.891168	0.889056	0.819424	0.757318	0.822713	0.922895	0.929018	0.92552	0.916404	0.922351	0.919545	0.932196	0.918826	0.953244	0.9376	0.921172	0.925512	0.919822	0.933348	0.940173
	2.5	0.863185	0.691037	0.767284	0.778273	0.844123	0.669479	0.679912	0.865955	0.87231	0.820705	0.880696	0.874937	0.793899	0.712685	0.803955	0.918647	0.920048	0.920278	0.912723	0.920847	0.914538	0.926055	0.91641	0.949233	0.930992	0.917069	0.922134	0.91631	0.931128	0.938276
	2.6	0.846922	0.65905	0.757814	0.744487	0.827214	0.639425	0.6473	0.855697	0.858215	0.804242	0.869921	0.860798	0.771238	0.678511	0.784575	0.914829	0.914468	0.918933	0.912289	0.914098	0.916786	0.919996	0.91376	0.948398	0.928558	0.91472	0.919004	0.920347	0.928995	0.937195
	2.7	0.824844	0.631029	0.746114	0.713146	0.810146	0.620486	0.619357	0.848795	0.843795	0.790026	0.85874	0.847426	0.750735	0.646848	0.769306	0.910799	0.913455	0.916908	0.907691	0.911566	0.91582	0.91553	0.908311	0.946175	0.927973	0.914349	0.916277	0.910058	0.924896	0.935106
	2.8	0.806678	0.604937	0.739902	0.680857	0.794484	0.598725	0.58822	0.839838	0.82681	0.772612	0.84889	0.831007	0.731746	0.619336	0.750894	0.910512	0.912819	0.907494	0.904659	0.91077	0.91335	0.920072	0.906307	0.943277	0.924947	0.910351	0.915408	0.90643	0.923203	0.932526
	2.9	0.786362	0.579663	0.735981	0.649963	0.779806	0.576297	0.562923	0.832144	0.813044	0.759966	0.836845	0.815789	0.707083	0.598034	0.735453	0.906927	0.910458	0.909626	0.900593	0.908737	0.903195	0.912818	0.902876	0.942016	0.919888	0.906157	0.910014	0.906903	0.917523	0.927141
	3	0.766055	0.558878	0.731122	0.618369	0.767096	0.556801	0.539789	0.822877	0.799236	0.745012	0.824964	0.800406	0.68795	0.57975	0.714688	0.905348	0.906363	0.909841	0.89888	0.905399	0.902609	0.906693	0.899392	0.935484	0.919075	0.902493	0.906719	0.898355	0.916849	0.93109
	3.1	0.745026	0.536395	0.721822	0.589179	0.755375	0.538803	0.519672	0.817593	0.781515	0.729581	0.81159	0.783641	0.666753	0.564392	0.701325	0.899586	0.908285	0.908246	0.896986	0.903486	0.89268	0.908799	0.89644	0.934886	0.917917	0.900127	0.903796	0.902046	0.91667	0.926085
	3.2	0.724642	0.517503	0.712452	0.561778	0.745058	0.527961	0.501979	0.80971	0.768167	0.716942	0.801446	0.766899	0.647062	0.545453	0.683805	0.896781	0.901411	0.90198	0.89393	0.899571	0.896902	0.902954	0.893406	0.935995	0.915191	0.895392	0.903696	0.900044	0.911969	0.922817
	3.3	0.703574	0.500129	0.705995	0.535798	0.734935	0.504698	0.481747	0.805748	0.750265	0.70432	0.788839	0.748495	0.626488	0.532003	0.672823	0.896557	0.898735	0.898725	0.891266	0.89463	0.893838	0.905031	0.890297	0.930044	0.91254	0.894138	0.899852	0.890286	0.907239	0.914544
	3.4	0.68096	0.481629	0.69967	0.511962	0.726695	0.496548	0.468193	0.799225	0.735754	0.692153	0.773443	0.731804	0.613108	0.518274	0.655462	0.889835	0.899208	0.892534	0.886056	0.891755	0.889523	0.899432	0.888175	0.929969	0.908222	0.889439	0.896223	0.887841	0.904582	0.918265
	3.5	0.65812	0.468015	0.694109	0.489034	0.71674	0.476037	0.450964	0.793635	0.719307	0.680056	0.761737	0.715336	0.59795	0.507381	0.641364	0.889315	0.893907	0.891848	0.884574	0.887221	0.885035	0.895954	0.883193	0.932454	0.907068	0.88712	0.893082	0.88922	0.905259	0.915275
	3.6	0.637278	0.454467	0.686362	0.465667	0.708943	0.468292	0.436199	0.787805	0.706367	0.665302	0.747657	0.698519	0.581971	0.491033	0.625379	0.8867	0.887839	0.887104	0.883054	0.887789	0.885119	0.897452	0.880794	0.928088	0.904894	0.886018	0.889977	0.889226	0.904108	0.912841
	3.7	0.614407	0.438898	0.683093	0.444111	0.70264	0.456802	0.425094	0.785818	0.693863	0.65364	0.7372	0.680079	0.569999	0.480169	0.612793	0.883825	0.891239	0.885454	0.87712	0.885285	0.884038	0.891335	0.877046	0.927772	0.901617	0.88197	0.887074	0.883347	0.901383	0.912014
	3.8	0.594317	0.428613	0.681285	0.425414	0.692208	0.446388	0.413018	0.778797	0.675477	0.640644	0.722884	0.664847	0.557366	0.468362	0.598908	0.880139	0.885826	0.882419	0.874273	0.881255	0.877102	0.888272	0.875598	0.920174	0.902527	0.877527	0.885226	0.882696	0.895825	0.909512
	3.9	0.572766	0.415185	0.67271	0.408125	0.685556	0.434392	0.402616	0.775326	0.664708	0.628071	0.710247	0.645394	0.548525	0.461187	0.586202	0.876615	0.882525	0.881532	0.871516	0.881723	0.87559	0.885507	0.872285	0.91933	0.894767	0.875685	0.882264	0.876194	0.893555	0.909886
	4	0.551613	0.404103	0.666747	0.391595	0.679237	0.425001	0.391519	0.76981	0.647778	0.616175	0.698188	0.630183	0.535474	0.452379	0.5731	0.873824	0.880449	0.877468	0.868819	0.875936	0.877027	0.884519	0.869455	0.918447	0.896364	0.874183	0.879805	0.875287	0.897266	0.902776
	4.1	0.53544	0.393811	0.662277	0.378203	0.675993	0.415257	0.378586	0.768657	0.638813	0.607629	0.6896	0.616893	0.52737	0.438936	0.562023	0.87073	0.878018	0.875665	0.865582	0.874721	0.867475	0.879914	0.866586	0.920938	0.891935	0.872174	0.876388	0.87271	0.88682	0.902909
	4.2	0.524273	0.385664	0.660529	0.364985	0.670507	0.413615	0.371121	0.763512	0.630759	0.603294	0.680029	0.606393	0.517486	0.436251	0.558244	0.868211	0.873461	0.876831	0.862983	0.871442	0.869878	0.876255	0.863843	0.91623	0.892228	0.86806	0.873946	0.868692	0.887605	0.902658
	4.3	0.511481	0.378507	0.657636	0.354858	0.664695	0.407356	0.366158	0.762301	0.625055	0.597169	0.671407	0.596591	0.51371	0.424845	0.550947	0.865078	0.874775	0.872951	0.861644	0.866255	0.866614	0.875032	0.861011	0.914428	0.88778	0.865044	0.87102	0.867506	0.883281	0.895897
	4.4	0.500754	0.372869	0.651689	0.343835	0.659922	0.399934	0.355349	0.75711	0.620405	0.592833	0.664224	0.586857	0.501833	0.422385	0.54572	0.864265	0.867731	0.871451	0.859127	0.862785	0.857745	0.869505	0.858929	0.911476	0.885185	0.860917	0.869864	0.868904	0.886325	0.89536
	4.5	0.492268	0.364372	0.647838	0.333722	0.657397	0.398283	0.352567	0.753775	0.610533	0.587606	0.657274	0.577235	0.497186	0.413588	0.53882	0.858513	0.867816	0.868078	0.853603	0.861724	0.861736	0.867313	0.856025	0.910914	0.882766	0.861695	0.866117	0.861383	0.881965	0.894154
	4.6	0.48027	0.35912	0.640532	0.325666	0.653913	0.393439	0.34284	0.751214	0.606462	0.58242	0.650766	0.568423	0.492209	0.409324	0.534635	0.858602	0.865334	0.864108	0.851842	0.861116	0.856193	0.865484	0.852318	0.904971	0.880634	0.859654	0.864147	0.858036	0.880326	0.88985
	4.7	0.47249	0.353688	0.644058	0.318735	0.648948	0.388147	0.33877	0.748619	0.599579	0.57905	0.646003	0.561162	0.486868	0.403768	0.525566	0.855136	0.864179	0.862978	0.849369	0.854614	0.857129	0.863023	0.85049	0.90702	0.877883	0.855778	0.862302	0.860485	0.875449	0.893139
	4.8	0.465659	0.34761	0.637683	0.310039	0.645535	0.385738	0.332932	0.745463	0.595747	0.575223	0.63897	0.553253	0.483548	0.400408	0.526573	0.851632	0.860067	0.857009	0.845613	0.85443	0.854996	0.862903	0.848017	0.905978	0.87706	0.852499	0.858411	0.854393	0.874352	0.888801
	4.9	0.459135	0.343535	0.634814	0.304537	0.644037	0.384362	0.331039	0.744611	0.594907	0.5709	0.634408	0.546935	0.478836	0.394429	0.526124	0.848866	0.857824	0.853953	0.841731	0.852054	0.847355	0.858473	0.842724	0.905737	0.874591	0.850207	0.854435	0.853614	0.872494	0.886107
	5	0.451479	0.340798	0.632239	0.29822	0.640601	0.38502	0.326107	0.739867	0.586614	0.568307	0.628401	0.539816	0.473742	0.390274	0.517548	0.846566	0.858639	0.856709	0.838916	0.849949	0.849448	0.858698	0.842154	0.901491	0.869749	0.846188	0.8542	0.848025	0.872663	0.882937
	5.1	0.446394	0.33682	0.628926	0.293418	0.636219	0.380947	0.31872	0.737134	0.583234	0.564127	0.623763	0.533892	0.468482	0.388219	0.51319	0.845011	0.856342	0.850127	0.840635	0.846628	0.845577	0.85409	0.838083	0.896832	0.869993	0.845072	0.850639	0.846846	0.868245	0.883533
	5.2	0.44202	0.332931	0.62671	0.287399	0.632315	0.379937	0.315511	0.732486	0.579129	0.562366	0.619328	0.52759	0.467634	0.385191	0.51142	0.84256	0.849212	0.848538	0.833129	0.843228	0.842593	0.850168	0.833566	0.897363	0.869487	0.842339	0.848579	0.846158	0.864587	0.87875
	5.3	0.43624	0.329367	0.623944	0.282058	0.631045	0.377267	0.311484	0.731312	0.574618	0.556932	0.61707	0.522087	0.463022	0.382785	0.507303	0.83898	0.847174	0.847903	0.832484	0.841036	0.840695	0.853061	0.830295	0.892416	0.86575	0.839123	0.846996	0.841799	0.866445	0.875811
	5.4	0.427486	0.325031	0.620412	0.279115	0.628552	0.372284	0.311287	0.728153	0.571945	0.55566	0.612032	0.516644	0.461454	0.378843	0.509629	0.837094	0.841902	0.843052	0.831396	0.840194	0.837648	0.846725	0.831078	0.894506	0.863661	0.836979	0.84238	0.841039	0.861439	0.875777
	5.5	0.425606	0.321908	0.621247	0.274098	0.625667	0.372576	0.307838	0.724138	0.569133	0.553985	0.607388	0.511146	0.455672	0.377788	0.506794	0.834342	0.84355	0.841126	0.824993	0.834852	0.839151	0.845302	0.828363	0.895868	0.859706	0.836928	0.840789	0.835447	0.859363	0.876156
	5.6	0.419603	0.323238	0.615599	0.270861	0.622823	0.374575	0.303496	0.723565	0.566786	0.553419	0.603389	0.506599	0.45383	0.373265	0.50097	0.82927	0.83782	0.840847	0.824296	0.833833	0.834114	0.843417	0.821741	0.892723	0.8556	0.830528	0.83925	0.83413	0.858821	0.872246
	5.7	0.41687	0.318516	0.612404	0.267521	0.619685	0.368803	0.300907	0.719627	0.561736	0.549064	0.601891	0.501086	0.452597	0.371596	0.500189	0.82725	0.837974	0.834707	0.821145	0.831406	0.83771	0.837871	0.822461	0.890143	0.856909	0.828105	0.836149	0.833983	0.857968	0.867737
	5.8	0.412068	0.317319	0.611412	0.264032	0.618565	0.369365	0.301832	0.718443	0.559736	0.548462	0.597443	0.496968	0.45035	0.369898	0.498287	0.82651	0.837026	0.833118	0.817858	0.826696	0.833116	0.835079	0.819205	0.884958	0.854609	0.826803	0.834315	0.830265	0.855795	0.864964
	5.9	0.410225	0.315584	0.610926	0.261815	0.614426	0.366565	0.298861	0.714813	0.556651	0.545009	0.594745	0.492895	0.447523	0.36976	0.491984	0.823561	0.832126	0.833038	0.81611	0.824294	0.827533	0.833982	0.815225	0.881735	0.850367	0.822905	0.831709	0.829573	0.852897	0.862862
	6	0.406297	0.312632	0.606976	0.25884	0.613499	0.365924	0.293343	0.713617	0.551288	0.542529	0.590546	0.489365	0.447082	0.36661	0.492938	0.819023	0.832244	0.829665	0.813221	0.82495	0.821613	0.833428	0.814734	0.881531	0.849599	0.82076	0.828633	0.827691	0.847848	0.861068
	6.1	0.40244	0.313002	0.604827	0.256409	0.610701	0.365924	0.293399	0.709497	0.551932	0.541619	0.58791	0.48486	0.44162	0.364995	0.494413	0.818541	0.828808	0.82846	0.811896	0.819919	0.822877	0.829319	0.811771	0.881782	0.84507	0.819957	0.826254	0.825151	0.853438	0.859642
	6.2	0.400478	0.312503	0.601117	0.254253	0.609186	0.365584	0.292012	0.708798	0.548731	0.539035	0.586174	0.480679	0.442484	0.363864	0.491304	0.815476	0.827947	0.823771	0.809446	0.819291	0.814167	0.826156	0.809547	0.880197	0.842612	0.813231	0.823636	0.82314	0.845797	0.863479
	6.3	0.397213	0.309778	0.600223	0.25231	0.605229	0.362858	0.288815	0.70559	0.546146	0.538362	0.582238	0.477511	0.439706	0.364674	0.486091	0.813718	0.822907	0.824436	0.805739	0.816975	0.820087	0.82484	0.803901	0.879731	0.840422	0.813784	0.822378	0.822093	0.848397	0.856438
	6.4	0.396123	0.308522	0.598008	0.249766	0.60513	0.363612	0.289041	0.703494	0.54374	0.535366	0.579904	0.473563	0.438261	0.361313	0.487013	0.811102	0.823668	0.820023	0.802304	0.813547	0.818327	0.82315	0.803478	0.877816	0.840864	0.811085	0.818676	0.818233	0.83637	0.854947
	6.5	0.393555	0.306625	0.59408	0.248013	0.600862	0.363698	0.287673	0.701557	0.542598	0.53468	0.575897	0.470903	0.438362	0.362502	0.484508	0.808484	0.820884	0.818968	0.801431	0.812207	0.813436	0.820407	0.801108	0.87665	0.837386	0.808624	0.815649	0.8153	0.838793	0.853953
	6.6	0.391352	0.306715	0.591803	0.247906	0.600738	0.364073	0.286561	0.697607	0.540376	0.534551	0.57264	0.466886	0.435153	0.360526	0.483028	0.806538	0.817076	0.816147	0.798046	0.809438	0.807995	0.819058	0.799137	0.871865	0.836869	0.807351	0.814188	0.808595	0.83709	0.853151
	6.7	0.389119	0.305635	0.589939	0.245108	0.599238	0.360994	0.286051	0.696533	0.537433	0.530773	0.571935	0.463462	0.435985	0.356711	0.4828	0.800769	0.815363	0.815188	0.796265	0.806925	0.807152	0.816233	0.797365	0.868746	0.83692	0.804797	0.812155	0.812735	0.833318	0.847863
	6.8	0.38568	0.305405	0.590117	0.243422	0.594839	0.362222	0.284139	0.694404	0.539109	0.529483	0.567603	0.461149	0.435398	0.35877	0.480253	0.799213	0.811057	0.812654	0.795342	0.806672	0.804629	0.81583	0.793466	0.874861	0.831232	0.800948	0.809581	0.804285	0.836047	0.847931
	6.9	0.385799	0.302397	0.58696	0.242493	0.594004	0.358585	0.283038	0.690616	0.535064	0.526714	0.567254	0.457198	0.431928	0.358152	0.476608	0.796721	0.809349	0.810511	0.790328	0.800788	0.79776	0.808369	0.790368	0.873375	0.829704	0.800126	0.806834	0.804216	0.829972	0.845177
	7	0.381138	0.303167	0.582814	0.241039	0.591413	0.353066	0.279837	0.684287	0.533303	0.524064	0.56347	0.454212	0.428791	0.356487	0.476601	0.794026	0.811055	0.809581	0.789046	0.798545	0.79991	0.808868	0.788113	0.867868	0.825978	0.794499	0.804039	0.802108	0.826648	0.846917
	7.1	0.378628	0.29956	0.571878	0.236353	0.58535	0.337299	0.27465	0.675479	0.5229	0.518711	0.559146	0.44768	0.422344	0.351873	0.469535	0.792501	0.806578	0.807912	0.786387	0.797526	0.798691	0.808215	0.787294	0.863393	0.826408	0.793555	0.802681	0.798843	0.828606	0.842129
	7.2	0.372024	0.293621	0.567875	0.231511	0.57372	0.329615	0.268302	0.666757	0.517835	0.512439	0.554115	0.441316	0.41498	0.344388	0.462768	0.789964	0.804354	0.803803	0.782953	0.796702	0.795751	0.803961	0.786083	0.86531	0.82312	0.793069	0.801257	0.8038	0.825264	0.840513
	7.3	0.363988	0.290488	0.566069	0.226146	0.567343	0.323552	0.258397	0.659863	0.509353	0.5049	0.547302	0.432934	0.406948	0.336432	0.457571	0.788197	0.797765	0.801202	0.780546	0.793918	0.791835	0.8057	0.781646	0.865537	0.822417	0.788028	0.79932	0.795156	0.824737	0.838822
	7.4	0.356153	0.286108	0.56246	0.223635	0.5592	0.316304	0.253412	0.650812	0.502834	0.497036	0.543308	0.425273	0.396125	0.332992	0.451694	0.785484	0.796322	0.797901	0.779604	0.792669	0.792021	0.800138	0.779709	0.862996	0.819223	0.784538	0.796265	0.787506	0.820369	0.839101
	7.5	0.349598	0.282152	0.56175	0.216759	0.554407	0.311173	0.24994	0.644552	0.493414	0.492331	0.534096	0.415792	0.392945	0.326616	0.44407	0.784135	0.795545	0.797475	0.775265	0.78802	0.785968	0.79692	0.778169	0.8609	0.820465	0.783242	0.793035	0.789783	0.816442	0.833355
	7.6	0.341859	0.275979	0.557644	0.212933	0.547607	0.306051	0.243937	0.637155	0.484096	0.487159	0.529273	0.40727	0.38503	0.320622	0.435211	0.781559	0.792968	0.799924	0.773441	0.787279	0.782913	0.794975	0.773881	0.857609	0.8171	0.783789	0.792282	0.787503	0.819326	0.831232
	7.7	0.332133	0.272408	0.556918	0.208361	0.543228	0.302043	0.238536	0.629793	0.478548	0.479109	0.519913	0.398724	0.380373	0.317905	0.433694	0.780347	0.793513	0.796366	0.77201	0.784035	0.785392	0.796934	0.76869	0.855994	0.81356	0.781613	0.789222	0.78452	0.814301	0.826917
	7.8	0.325001	0.267193	0.551814	0.203219	0.539997	0.29686	0.235407	0.624976	0.471608	0.472635	0.514729	0.390588	0.371709	0.314104	0.422581	0.77524	0.787887	0.788152	0.768645	0.783186	0.786359	0.790688	0.769062	0.853067	0.810144	0.777681	0.786493	0.784601	0.811422	0.827376
	7.9	0.315479	0.264414	0.553902	0.19824	0.535817	0.29159	0.233468	0.62288	0.461229	0.465373	0.507592	0.381399	0.368604	0.311186	0.417435	0.774469	0.787991	0.789687	0.766265	0.777466	0.778776	0.788129	0.765245	0.852872	0.809338	0.775834	0.78409	0.778468	0.812469	0.82548
	8	0.306572	0.259872	0.54984	0.194758	0.533434	0.29132	0.228553	0.618931	0.453471	0.460881	0.500227	0.370835	0.362724	0.310817	0.410263	0.772794	0.78156	0.785042	0.762887	0.776718	0.780567	0.788691	0.764397	0.849456	0.805817	0.771934	0.782369	0.780661	0.809561	0.828871
	8.1	0.299017	0.257583	0.55012	0.190797	0.5286	0.287399	0.223982	0.613913	0.445471	0.451872	0.49207	0.36331	0.358452	0.306879	0.402367	0.769803	0.785148	0.784795	0.759438	0.773597	0.780088	0.788511	0.760992	0.846993	0.808535	0.76969	0.778593	0.778797	0.803755	0.82332
	8.2	0.290304	0.254694	0.546396	0.186708	0.525669	0.283919	0.22315	0.609379	0.437111	0.445045	0.484684	0.354152	0.353104	0.304223	0.39563	0.767139	0.779703	0.786322	0.756817	0.773495	0.773503	0.787345	0.761298	0.843382	0.801961	0.768037	0.777113	0.777833	0.802382	0.822097
	8.3	0.28226	0.251849	0.542654	0.183183	0.522985	0.279311	0.218621	0.606986	0.429856	0.439535	0.477295	0.345036	0.348369	0.302287	0.38914	0.764993	0.779044	0.781575	0.755159	0.771794	0.776292	0.783373	0.757478	0.847837	0.803631	0.766702	0.774582	0.775372	0.803565	0.823404
	8.4	0.275102	0.249303	0.539165	0.179918	0.519436	0.2782	0.218074	0.603234	0.422737	0.43093	0.467046	0.33651	0.345522	0.300213	0.38286	0.763557	0.778516	0.778463	0.756968	0.769523	0.770669	0.777912	0.754219	0.845093	0.799937	0.764311	0.774339	0.769643	0.799445	0.819736
	8.5	0.266039	0.246462	0.54029	0.176089	0.518679	0.274881	0.215314	0.60255	0.416166	0.427698	0.461788	0.327488	0.341615	0.297532	0.379009	0.760522	0.773526	0.776871	0.751107	0.766988	0.772221	0.77591	0.753231	0.845685	0.795117	0.761198	0.770784	0.770512	0.799398	0.814027
	8.6	0.259327	0.244183	0.535774	0.173032	0.514412	0.274289	0.213735	0.599237	0.410357	0.421225	0.452434	0.319008	0.337709	0.297377	0.374752	0.757415	0.767851	0.779333	0.749531	0.763387	0.767162	0.775032	0.748468	0.840813	0.795356	0.758333	0.769062	0.768761	0.799581	0.818232
	8.7	0.252744	0.239758	0.535239	0.169001	0.513004	0.269885	0.210239	0.596681	0.402892	0.412078	0.444339	0.310236	0.334682	0.295227	0.364155	0.75671	0.770688	0.775159	0.74656	0.763536	0.76639	0.7736	0.747899	0.843161	0.795432	0.755582	0.768017	0.763313	0.799183	0.812681
	8.8	0.244979	0.238391	0.531896	0.166621	0.510179	0.267576	0.207513	0.592137	0.395787	0.406504	0.436897	0.302479	0.329973	0.291607	0.358004	0.753077	0.767621	0.774053	0.744682	0.762731	0.764878	0.774451	0.74599	0.837585	0.793019	0.754338	0.764133	0.765643	0.793335	0.813586
	8.9	0.238329	0.237093	0.526787	0.164594	0.508477	0.265503	0.205038	0.590128	0.389009	0.398267	0.427851	0.29466	0.32804	0.291217	0.351411	0.751381	0.765638	0.770067	0.742904	0.760203	0.762297	0.76883	0.744675	0.838264	0.78662	0.751161	0.762433	0.760955	0.79441	0.810442
	9	0.233198	0.234839	0.527	0.160859	0.507056	0.264675	0.20507	0.587245	0.38312	0.39145	0.418873	0.286269	0.324469	0.290028	0.344045	0.748665	0.763963	0.769793	0.741941	0.757269	0.755796	0.766771	0.740852	0.835119	0.786829	0.750702	0.761243	0.757455	0.793715	0.80583
	9.1	0.227589	0.232957	0.528633	0.15887	0.502977	0.26076	0.203536	0.585238	0.376647	0.388399	0.413419	0.28021	0.322613	0.285093	0.339551	0.748727	0.762871	0.764318	0.739378	0.752423	0.757339	0.767251	0.739452	0.832822	0.78806	0.747998	0.758503	0.759072	0.787626	0.805151
	9.2	0.222854	0.232521	0.527011	0.157336	0.503249	0.26045	0.20008	0.582721	0.376004	0.38551	0.408836	0.274685	0.319805	0.284609	0.336218	0.746257	0.75938	0.763723	0.736134	0.752402	0.755397	0.762481	0.736117	0.833219	0.782918	0.746069	0.75441	0.758865	0.789171	0.802274
	9.3	0.217728	0.229273	0.525676	0.155822	0.501277	0.256909	0.199499	0.578082	0.371854	0.382141	0.402695	0.269795	0.319023	0.283634	0.332526	0.743483	0.757462	0.760664	0.730841	0.751175	0.75357	0.761754	0.734464	0.832151	0.781083	0.741911	0.754513	0.754984	0.786059	0.800882
	9.4	0.21463	0.228238	0.521431	0.153232	0.497028	0.258421	0.199013	0.577016	0.370249	0.380828	0.399279	0.26479	0.317385	0.28372	0.329774	0.741204	0.755148	0.758496	0.731817	0.747868	0.749645	0.759502	0.732698	0.829775	0.780983	0.740852	0.751759	0.75313	0.779374	0.801076
	9.5	0.211107	0.228177	0.522383	0.151971	0.496985	0.257354	0.196266	0.576494	0.363494	0.375812	0.394702	0.259759	0.312898	0.282539	0.327995	0.739988	0.751471	0.75578	0.729181	0.746348	0.747215	0.756743	0.729342	0.829099	0.779548	0.738565	0.748969	0.752201	0.78442	0.799565
	9.6	0.207642	0.225734	0.520726	0.150641	0.49616	0.257201	0.195298	0.573874	0.360267	0.372412	0.389311	0.255399	0.313022	0.282644	0.324907	0.736474	0.752561	0.755083	0.728379	0.746441	0.746479	0.756103	0.725566	0.826647	0.777793	0.737897	0.747631	0.747735	0.779611	0.798923
	9.7	0.204631	0.225567	0.519037	0.14931	0.49525	0.255929	0.195458	0.571049	0.360173	0.371579	0.386339	0.251571	0.312526	0.279786	0.322676	0.732958	0.750521	0.754759	0.725414	0.73962	0.744031	0.75143	0.726058	0.821518	0.775834	0.734354	0.746163	0.742578	0.778295	0.794738
	9.8	0.202716	0.225898	0.516808	0.147601	0.491879	0.255324	0.194802	0.569785	0.356975	0.36958	0.383262	0.248126	0.310925	0.279558	0.319376	0.731771	0.7499	0.749291	0.722665	0.740874	0.74145	0.751144	0.722635	0.820839	0.773646	0.732478	0.743704	0.746456	0.773472	0.795075
	9.9	0.199579	0.224356	0.517	0.14647	0.490628	0.255581	0.193948	0.568144	0.355571	0.369511	0.381426	0.244186	0.3077	0.279855	0.317405	0.730468	0.745471	0.752477	0.722427	0.738142	0.736271	0.748336	0.720827	0.824218	0.770366	0.732513	0.740921	0.739644	0.777804	0.794592
	10	0.196864	0.224397	0.519926	0.145119	0.491209	0.253786	0.192655	0.565689	0.352506	0.365134	0.378081	0.24127	0.306953	0.278251	0.31386	0.728767	0.742371	0.747732	0.718206	0.73602	0.737473	0.746158	0.717666	0.818119	0.773148	0.727906	0.737762	0.735588	0.767325	0.792784
	10.1	0.194938	0.22295	0.510638	0.142969	0.487907	0.254252	0.190036	0.564337	0.349992	0.362438	0.373699	0.238824	0.30605	0.278916	0.313074	0.725736	0.740692	0.74904	0.717352	0.734301	0.736466	0.74627	0.716713	0.816791	0.766442	0.727871	0.737582	0.738021	0.775197	0.791994
	10.2	0.192822	0.222636	0.512694	0.142877	0.486109	0.252166	0.190503	0.56364	0.349239	0.362004	0.372735	0.235126	0.305509	0.277709	0.312019	0.724724	0.737914	0.742849	0.713334	0.733198	0.734382	0.74257	0.716418	0.816576	0.766868	0.725504	0.734249	0.739194	0.770115	0.790268
	10.3	0.190361	0.222286	0.515133	0.141733	0.485662	0.252466	0.190247	0.561845	0.346768	0.361196	0.367824	0.231811	0.305607	0.278757	0.307552	0.722585	0.73673	0.742056	0.712908	0.731344	0.732018	0.741382	0.711283	0.81614	0.764953	0.722846	0.733782	0.730356	0.771969	0.786831
	10.4	0.188628	0.22087	0.510133	0.140904	0.485234	0.252183	0.189855	0.560495	0.342424	0.356949	0.368031	0.229515	0.301256	0.277806	0.306257	0.719385	0.73274	0.741793	0.70945	0.724978	0.731189	0.739416	0.711997	0.818004	0.764449	0.72146	0.730933	0.733702	0.770183	0.783001
	10.5	0.187036	0.220812	0.509966	0.139955	0.482678	0.251796	0.189249	0.556951	0.343441	0.355856	0.364889	0.227141	0.301931	0.276383	0.303436	0.717397	0.728273	0.739208	0.707469	0.724826	0.730932	0.732948	0.708211	0.813725	0.76251	0.717284	0.72773	0.729808	0.762631	0.781318
	10.6	0.185602	0.220381	0.505508	0.139347	0.483313	0.254161	0.187553	0.55495	0.341694	0.355235	0.364142	0.224838	0.299603	0.275375	0.301339	0.715061	0.728181	0.738345	0.705081	0.722607	0.728843	0.734665	0.706221	0.812828	0.762385	0.714892	0.727818	0.724848	0.764403	0.781872
	10.7	0.184224	0.219418	0.508479	0.13805	0.481311	0.252671	0.187238	0.557078	0.339226	0.352562	0.360007	0.222617	0.302737	0.276859	0.298781	0.714026	0.727275	0.734724	0.701981	0.722027	0.723286	0.736961	0.70427	0.810656	0.757213	0.713192	0.724732	0.72923	0.762581	0.778937
	10.8	0.182652	0.219139	0.508019	0.138335	0.480348	0.251212	0.188161	0.552021	0.341047	0.350514	0.359297	0.220071	0.302479	0.275208	0.296736	0.71115	0.726531	0.73212	0.701393	0.72117	0.724355	0.731972	0.701989	0.809294	0.756196	0.710382	0.722343	0.725765	0.760885	0.77893
	10.9	0.18139	0.219513	0.505824	0.13714	0.478786	0.254749	0.188001	0.548807	0.338661	0.349603	0.357398	0.218147	0.301038	0.275075	0.297181	0.708564	0.724861	0.733724	0.700672	0.71858	0.720617	0.730943	0.702204	0.809582	0.754542	0.708625	0.721674	0.72441	0.76043	0.776679
	11	0.180589	0.219919	0.504702	0.136478	0.478779	0.252715	0.188012	0.547777	0.336118	0.34945	0.356039	0.216808	0.299626	0.276426	0.294137	0.706908	0.721762	0.729749	0.699004	0.717509	0.720431	0.729764	0.697369	0.809216	0.752111	0.707999	0.719182	0.724526	0.761247	0.775107
	11.1	0.178847	0.219347	0.502675	0.136125	0.476392	0.249727	0.186326	0.545815	0.335763	0.347697	0.352557	0.214745	0.301576	0.275841	0.293538	0.706698	0.722212	0.726633	0.695121	0.714657	0.715775	0.724947	0.695922	0.804353	0.750162	0.706018	0.718294	0.726665	0.758461	0.772077
	11.2	0.179032	0.218646	0.502891	0.135725	0.474676	0.252162	0.187444	0.544171	0.336604	0.346093	0.351658	0.213086	0.298967	0.275212	0.290208	0.702152	0.720377	0.727375	0.692861	0.712645	0.715867	0.723386	0.693672	0.808364	0.747278	0.702816	0.714885	0.718631	0.755474	0.772152
	11.3	0.176836	0.219217	0.498223	0.135304	0.475125	0.251556	0.184529	0.542839	0.333073	0.345341	0.350141	0.211547	0.299505	0.274486	0.288659	0.700893	0.716711	0.726397	0.69141	0.70973	0.710701	0.722783	0.694424	0.801843	0.747349	0.704417	0.714169	0.719863	0.751196	0.770822
	11.4	0.175358	0.217743	0.502263	0.134536	0.473836	0.252009	0.185822	0.541833	0.332803	0.34429	0.348801	0.209779	0.300607	0.273561	0.287274	0.700763	0.713553	0.722604	0.690018	0.710607	0.712484	0.719012	0.690784	0.801451	0.746776	0.700054	0.710734	0.715857	0.75211	0.768184
	11.5	0.174855	0.218788	0.499362	0.134769	0.473181	0.251839	0.186126	0.54075	0.329482	0.341715	0.348307	0.208419	0.296599	0.274367	0.288818	0.69751	0.71254	0.722392	0.68834	0.705851	0.71263	0.719892	0.687144	0.801054	0.744045	0.697888	0.710007	0.71511	0.749546	0.767334
	11.6	0.175622	0.217874	0.498394	0.13383	0.471057	0.251173	0.185691	0.539483	0.328366	0.342258	0.346588	0.206573	0.298122	0.275628	0.284727	0.696018	0.713581	0.721843	0.685138	0.706086	0.71028	0.715278	0.685541	0.798522	0.742399	0.694237	0.707246	0.712889	0.749227	0.768315
	11.7	0.173957	0.21869	0.498343	0.134364	0.470588	0.253129	0.185979	0.537593	0.330971	0.338667	0.34457	0.205131	0.297183	0.275317	0.283284	0.694257	0.706645	0.716426	0.683334	0.703111	0.706435	0.716741	0.683368	0.79867	0.741343	0.694419	0.70656	0.70882	0.746789	0.764283
	11.8	0.17236	0.217725	0.494941	0.132916	0.468101	0.254104	0.186737	0.536922	0.327974	0.339562	0.34261	0.204798	0.297917	0.27436	0.284125	0.69124	0.704047	0.718082	0.681184	0.70219	0.702449	0.712903	0.680351	0.797113	0.737937	0.693494	0.703933	0.705102	0.747549	0.764064
	11.9	0.171683	0.219453	0.494585	0.132633	0.467553	0.253756	0.185542	0.53514	0.327877	0.338549	0.341926	0.202588	0.29567	0.275053	0.281809	0.6905	0.702993	0.712159	0.6806	0.701568	0.701442	0.71292	0.677996	0.796272	0.73942	0.689292	0.703065	0.705471	0.747212	0.763636
	12	0.172438	0.218813	0.49337	0.132136	0.465476	0.249195	0.184934	0.52916	0.325184	0.338112	0.340704	0.201152	0.297989	0.274016	0.280913	0.688851	0.704005	0.713868	0.677323	0.698017	0.699455	0.709831	0.679761	0.790776	0.735811	0.687506	0.700681	0.702021	0.74179	0.760245
	12.1	0.171012	0.216766	0.483136	0.13167	0.462178	0.247174	0.185932	0.520895	0.324892	0.333031	0.339192	0.198555	0.292911	0.273626	0.276882	0.686735	0.701357	0.713857	0.676762	0.696413	0.696945	0.708158	0.676133	0.790321	0.736148	0.686273	0.69844	0.702093	0.742392	0.760487
	12.2	0.169212	0.216542	0.480521	0.131241	0.458492	0.241377	0.182574	0.513898	0.322608	0.327527	0.335919	0.196079	0.290292	0.272831	0.272671	0.6833	0.699492	0.706804	0.675342	0.696416	0.699034	0.710659	0.673796	0.791394	0.733111	0.684533	0.697162	0.701627	0.739843	0.753825
	12.3	0.166521	0.216279	0.480545	0.129717	0.45423	0.238955	0.179872	0.507957	0.319236	0.320943	0.332227	0.19327	0.287589	0.270187	0.269474	0.683788	0.697496	0.710685	0.672549	0.690974	0.697761	0.706024	0.671387	0.789029	0.73027	0.682434	0.69418	0.699782	0.736314	0.755466
	12.4	0.165486	0.213181	0.476644	0.128929	0.450134	0.237844	0.177826	0.502144	0.31423	0.316591	0.329682	0.190093	0.281553	0.26588	0.266216	0.680498	0.694484	0.705788	0.668045	0.691735	0.696631	0.702971	0.669902	0.786955	0.72834	0.682688	0.693233	0.692902	0.735457	0.75492
	12.5	0.164175	0.210141	0.476189	0.127058	0.445346	0.234564	0.174309	0.494918	0.312921	0.312445	0.325673	0.187364	0.279589	0.264916	0.260583	0.678556	0.698286	0.703709	0.668004	0.689969	0.692174	0.700143	0.669043	0.785999	0.728702	0.679476	0.690655	0.696173	0.735784	0.75377
	12.6	0.161074	0.211071	0.473593	0.125897	0.443088	0.235845	0.174754	0.492174	0.309674	0.307279	0.32241	0.184553	0.275565	0.263412	0.260226	0.676411	0.69244	0.702747	0.667824	0.689689	0.689087	0.699647	0.668003	0.787335	0.727835	0.677929	0.689807	0.694056	0.735195	0.75042
	12.7	0.159791	0.210479	0.471734	0.124729	0.438282	0.233419	0.173866	0.487726	0.304174	0.303041	0.319076	0.181645	0.274264	0.262654	0.255462	0.676337	0.691663	0.70563	0.665288	0.687931	0.686861	0.696923	0.664292	0.78127	0.727403	0.676875	0.686905	0.692883	0.731516	0.750056
	12.8	0.157637	0.207786	0.471128	0.123639	0.432884	0.232809	0.171287	0.483512	0.30147	0.298086	0.314564	0.178311	0.273041	0.262723	0.251602	0.67241	0.689067	0.70147	0.663597	0.68378	0.685566	0.69361	0.66389	0.781832	0.722695	0.674458	0.687001	0.693424	0.729928	0.750815
	12.9	0.156183	0.206014	0.466261	0.122891	0.429436	0.229686	0.170988	0.47864	0.298439	0.295063	0.310794	0.175212	0.269268	0.261772	0.247774	0.672187	0.685302	0.699986	0.659482	0.682468	0.689296	0.691975	0.662746	0.783774	0.721362	0.670587	0.68421	0.689211	0.728095	0.744539
	13	0.154035	0.20635	0.464968	0.122041	0.426509	0.231912	0.170367	0.477589	0.296002	0.290224	0.306552	0.172102	0.267325	0.261003	0.245978	0.669332	0.686391	0.696034	0.65889	0.678108	0.688782	0.69155	0.660456	0.776535	0.719271	0.669198	0.681313	0.685117	0.725707	0.746772
	13.1	0.152257	0.202676	0.461583	0.120642	0.424143	0.228684	0.169452	0.473768	0.292704	0.284281	0.303437	0.168921	0.265518	0.26183	0.243236	0.667487	0.684753	0.695311	0.657603	0.680533	0.682312	0.687787	0.655319	0.781155	0.71824	0.669025	0.681332	0.685771	0.726396	0.745047
	13.2	0.151281	0.202821	0.460614	0.119733	0.42155	0.226376	0.168601	0.472704	0.289244	0.281092	0.298175	0.165951	0.261419	0.259659	0.239675	0.665506	0.683918	0.693548	0.654312	0.677839	0.68303	0.691311	0.655546	0.776188	0.717535	0.664549	0.67818	0.683826	0.722792	0.739939
	13.3	0.148196	0.201663	0.461146	0.119114	0.418366	0.226689	0.166702	0.470261	0.28692	0.277204	0.295409	0.163061	0.258917	0.256812	0.237029	0.662088	0.679245	0.69604	0.653496	0.676631	0.681043	0.687351	0.654726	0.775308	0.714352	0.663673	0.676117	0.682863	0.722225	0.742174
	13.4	0.147906	0.202203	0.459606	0.118091	0.419516	0.225831	0.165897	0.467872	0.286161	0.274762	0.289574	0.159521	0.257238	0.257903	0.236843	0.660056	0.677065	0.688616	0.650139	0.673583	0.674321	0.685263	0.652045	0.773547	0.713931	0.661113	0.674613	0.678181	0.724015	0.737247
	13.5	0.145282	0.200193	0.456136	0.117108	0.416725	0.225923	0.1661	0.466147	0.281201	0.270358	0.285209	0.157275	0.256172	0.258539	0.234137	0.659736	0.675992	0.690695	0.647861	0.671429	0.677527	0.684904	0.650425	0.773239	0.710011	0.660979	0.673108	0.679773	0.718962	0.733803
	13.6	0.143326	0.200356	0.451396	0.115934	0.414452	0.224525	0.166027	0.46238	0.277719	0.267516	0.280189	0.15437	0.255053	0.255576	0.231065	0.656813	0.675618	0.688206	0.648744	0.66978	0.6757	0.680628	0.648973	0.772912	0.711313	0.660662	0.670001	0.674619	0.718575	0.736527
	13.7	0.142169	0.198658	0.450474	0.115673	0.412364	0.222024	0.163008	0.460978	0.275642	0.262768	0.277782	0.151397	0.253439	0.25507	0.22755	0.656013	0.67153	0.685345	0.646404	0.669114	0.670951	0.682202	0.646031	0.769298	0.706515	0.655253	0.668014	0.675332	0.714418	0.735565
	13.8	0.140448	0.197095	0.448367	0.114731	0.411394	0.220142	0.163878	0.456588	0.273412	0.258982	0.272025	0.148338	0.252268	0.254348	0.225981	0.654744	0.673695	0.687277	0.645394	0.667837	0.670494	0.680762	0.645316	0.774749	0.708465	0.656454	0.668105	0.672439	0.718331	0.736303
	13.9	0.138609	0.197888	0.44725	0.113986	0.410086	0.220787	0.162494	0.455618	0.270625	0.256847	0.269096	0.145554	0.249838	0.255537	0.223231	0.652807	0.671205	0.684568	0.643187	0.665005	0.669292	0.678653	0.645149	0.766268	0.70664	0.653843	0.667175	0.66974	0.712156	0.732943
	14	0.137233	0.198035	0.446029	0.113809	0.408645	0.218923	0.161088	0.455125	0.267603	0.253368	0.26339	0.143217	0.249516	0.253976	0.221867	0.649006	0.67293	0.68497	0.639342	0.665479	0.667837	0.680013	0.640725	0.766489	0.702604	0.650793	0.664303	0.666453	0.714092	0.732319
	14.1	0.136232	0.196077	0.444479	0.11311	0.406965	0.219332	0.162208	0.451553	0.266768	0.250815	0.261097	0.141558	0.250093	0.254908	0.221634	0.648266	0.668712	0.681308	0.638522	0.660834	0.669718	0.677624	0.639325	0.762609	0.703813	0.647236	0.662902	0.663863	0.714985	0.728638
	14.2	0.135401	0.196644	0.44555	0.11218	0.406619	0.221388	0.160533	0.450365	0.266433	0.247774	0.257052	0.140106	0.24796	0.252853	0.218465	0.646621	0.666256	0.67905	0.637563	0.662278	0.665669	0.675735	0.637147	0.765969	0.700265	0.646593	0.662117	0.669124	0.709778	0.728914
	14.3	0.134582	0.19551	0.443242	0.111421	0.405251	0.218357	0.16004	0.448732	0.265748	0.246343	0.255234	0.137279	0.245733	0.254214	0.218541	0.645905	0.663958	0.676925	0.634698	0.657731	0.664889	0.669434	0.634588	0.763023	0.699413	0.646394	0.660929	0.664032	0.707064	0.727678
	14.4	0.13307	0.194812	0.442675	0.111523	0.405175	0.218174	0.159739	0.447024	0.264118	0.243697	0.252343	0.135729	0.246251	0.253438	0.217324	0.644673	0.659097	0.677833	0.631596	0.656074	0.662042	0.670693	0.634228	0.763954	0.69787	0.643566	0.657914	0.663435	0.707182	0.725703
	14.5	0.132932	0.19486	0.440521	0.110171	0.403323	0.218684	0.156834	0.447195	0.263024	0.244409	0.251106	0.134796	0.245814	0.251183	0.217078	0.641455	0.660292	0.672419	0.631527	0.65625	0.660246	0.667473	0.633088	0.761561	0.696965	0.643552	0.65611	0.661077	0.702908	0.724549
	14.6	0.131673	0.195022	0.441324	0.109897	0.400536	0.219071	0.159243	0.443854	0.260984	0.241862	0.248039	0.133451	0.245791	0.253785	0.215278	0.64022	0.658524	0.672738	0.631091	0.653476	0.655833	0.66487	0.632004	0.759825	0.696508	0.63966	0.654277	0.660382	0.701975	0.723551
	14.7	0.131169	0.194484	0.440559	0.109516	0.402012	0.218017	0.158261	0.443203	0.261442	0.241426	0.247255	0.132085	0.245113	0.252737	0.215411	0.639138	0.657948	0.670129	0.628514	0.653814	0.659328	0.665945	0.628092	0.757751	0.693534	0.638218	0.652082	0.661171	0.704012	0.720483
	14.8	0.130934	0.19474	0.437918	0.10854	0.399335	0.218039	0.158968	0.442087	0.259763	0.240458	0.245242	0.131149	0.243118	0.251577	0.213434	0.636336	0.654024	0.668575	0.626485	0.652527	0.658161	0.662868	0.625793	0.757706	0.691004	0.639357	0.650928	0.657136	0.699357	0.717016
	14.9	0.129482	0.194196	0.439965	0.1087	0.399339	0.217085	0.158568	0.440562	0.25832	0.238255	0.243677	0.129451	0.244226	0.252372	0.21321	0.633876	0.652098	0.667263	0.622698	0.650683	0.659026	0.660657	0.624529	0.755378	0.689127	0.635141	0.648724	0.653509	0.697841	0.716509
	15	0.128762	0.193133	0.436864	0.108216	0.399008	0.217155	0.15764	0.441063	0.258538	0.23756	0.241294	0.128439	0.242436	0.251663	0.211894	0.633836	0.653044	0.664685	0.623147	0.651085	0.649643	0.661548	0.62319	0.754279	0.690574	0.633025	0.647536	0.65162	0.698608	0.717864
	15.1	0.127833	0.192059	0.435021	0.108095	0.397896	0.217952	0.157008	0.439206	0.255982	0.236669	0.239348	0.127639	0.243225	0.251245	0.211947	0.632023	0.653207	0.667871	0.621589	0.64702	0.654365	0.65883	0.61949	0.755031	0.687455	0.629691	0.647124	0.653937	0.698386	0.715698
	15.2	0.127402	0.192012	0.435763	0.107657	0.39637	0.218413	0.156114	0.438924	0.256283	0.234686	0.237486	0.126457	0.24377	0.251725	0.212229	0.630241	0.649378	0.66678	0.619415	0.647125	0.648796	0.657889	0.620341	0.751107	0.686151	0.631243	0.643895	0.650675	0.696345	0.713058
	15.3	0.127003	0.19241	0.434325	0.10682	0.395797	0.216623	0.157461	0.436282	0.255806	0.234125	0.236298	0.125559	0.24092	0.251172	0.211763	0.629651	0.64863	0.664013	0.619182	0.644278	0.64958	0.657023	0.61889	0.750514	0.682587	0.627661	0.642723	0.649071	0.693638	0.715899
	15.4	0.126466	0.192704	0.434197	0.107274	0.395494	0.217416	0.157653	0.436074	0.255135	0.233421	0.236233	0.12445	0.239977	0.251548	0.210341	0.627476	0.644816	0.66607	0.617202	0.642778	0.647226	0.653534	0.618433	0.748231	0.682416	0.626518	0.641185	0.647441	0.69301	0.712501
	15.5	0.125946	0.191813	0.433101	0.107015	0.394541	0.216636	0.156701	0.43453	0.25328	0.234632	0.234625	0.123883	0.240659	0.252408	0.210311	0.625733	0.641491	0.657886	0.614394	0.639592	0.647186	0.6514	0.615374	0.749251	0.685524	0.626335	0.639775	0.64888	0.691662	0.709726
	15.6	0.125057	0.19271	0.434205	0.106274	0.394321	0.218762	0.156077	0.432193	0.255669	0.232064	0.23389	0.122828	0.23971	0.25278	0.209631	0.622924	0.641532	0.656833	0.612721	0.638614	0.644658	0.653663	0.615379	0.744426	0.68126	0.62537	0.638135	0.647835	0.694258	0.709884
	15.7	0.125301	0.192829	0.433878	0.106145	0.393141	0.217808	0.156522	0.430346	0.253809	0.232296	0.231786	0.122302	0.241617	0.250789	0.208638	0.622141	0.64218	0.659646	0.609804	0.637521	0.641532	0.653218	0.610997	0.746123	0.681037	0.621805	0.63593	0.646481	0.691009	0.706076
	15.8	0.124525	0.19208	0.431061	0.10661	0.390761	0.219132	0.155877	0.432538	0.253158	0.231663	0.232343	0.121767	0.239165	0.251067	0.207274	0.619785	0.641509	0.654203	0.610492	0.634426	0.641288	0.645412	0.608878	0.745712	0.681694	0.620929	0.634401	0.645052	0.688044	0.709518
	15.9	0.125239	0.192845	0.431856	0.106072	0.392572	0.218579	0.156175	0.430147	0.25215	0.231425	0.230637	0.120839	0.241177	0.251953	0.207601	0.619918	0.634311	0.653182	0.608617	0.632962	0.641403	0.650802	0.607823	0.744918	0.677182	0.619288	0.632746	0.639676	0.684519	0.708249
	16	0.123627	0.192579	0.430599	0.105433	0.391051	0.217486	0.156546	0.42839	0.251465	0.229354	0.230485	0.120182	0.242394	0.251017	0.207817	0.617046	0.638203	0.652823	0.605271	0.634469	0.639244	0.644408	0.607312	0.743783	0.676984	0.617783	0.631738	0.638425	0.686179	0.704945
	16.1	0.124085	0.193153	0.430282	0.105635	0.390386	0.218226	0.157488	0.428459	0.249945	0.229121	0.229721	0.119722	0.241539	0.251942	0.206524	0.61365	0.635724	0.652991	0.60639	0.631671	0.637785	0.644614	0.606981	0.742528	0.674497	0.616677	0.629577	0.636702	0.684859	0.705587
	16.2	0.123494	0.191731	0.428675	0.105069	0.390809	0.216462	0.156383	0.428846	0.251769	0.229304	0.228473	0.119485	0.24088	0.252086	0.20557	0.614004	0.630146	0.651826	0.604285	0.631579	0.637905	0.643829	0.60577	0.741592	0.672862	0.615223	0.628449	0.639882	0.682643	0.700769
	16.3	0.123098	0.191833	0.429593	0.105394	0.388926	0.218666	0.15681	0.427339	0.249122	0.227996	0.227739	0.118811	0.240254	0.25248	0.207195	0.613613	0.634163	0.648885	0.602103	0.62948	0.6361	0.641199	0.60251	0.737131	0.670492	0.61236	0.626686	0.632764	0.684006	0.703594
	16.4	0.122402	0.193697	0.428011	0.104925	0.388939	0.218274	0.156349	0.424723	0.249661	0.226962	0.225455	0.118047	0.239243	0.25188	0.205232	0.609307	0.632184	0.649485	0.600228	0.626559	0.636783	0.640258	0.601915	0.737947	0.669543	0.611247	0.626585	0.634262	0.680768	0.701005
	16.5	0.122361	0.192408	0.429075	0.104674	0.388374	0.21746	0.155719	0.424016	0.249903	0.228433	0.225965	0.117791	0.239775	0.252003	0.205262	0.610002	0.628782	0.646715	0.597558	0.62455	0.63108	0.640063	0.599515	0.735277	0.668672	0.608303	0.623341	0.632026	0.67967	0.700417
	16.6	0.123043	0.193283	0.427032	0.104898	0.386837	0.22006	0.157021	0.425975	0.249948	0.22797	0.225082	0.117394	0.240378	0.253127	0.206504	0.607632	0.624679	0.642597	0.597496	0.62452	0.631368	0.63971	0.598141	0.7353	0.668674	0.608413	0.62253	0.634713	0.675808	0.694343
	16.7	0.122473	0.193909	0.426787	0.105052	0.386313	0.218679	0.156576	0.423476	0.248437	0.226653	0.224084	0.117375	0.240463	0.252296	0.205469	0.605585	0.624913	0.642372	0.595702	0.622275	0.62873	0.636056	0.598447	0.735652	0.665051	0.606461	0.621238	0.633111	0.677698	0.699112
	16.8	0.121821	0.193059	0.426404	0.104421	0.387047	0.220448	0.15493	0.422659	0.250403	0.226447	0.224113	0.116473	0.239993	0.252354	0.20605	0.603407	0.623183	0.645054	0.593734	0.622536	0.627062	0.635955	0.593394	0.73267	0.664446	0.603903	0.618955	0.628214	0.677375	0.694233
	16.9	0.121587	0.193558	0.42467	0.104872	0.385723	0.220421	0.156389	0.420003	0.2484	0.227257	0.222734	0.116588	0.240492	0.25187	0.205043	0.602477	0.624837	0.641349	0.591361	0.619967	0.626308	0.634704	0.593723	0.730791	0.662748	0.602074	0.617209	0.627613	0.676364	0.69057
	17	0.122406	0.19288	0.423159	0.104357	0.38478	0.219302	0.157125	0.419338	0.248227	0.226878	0.222324	0.115671	0.240978	0.254254	0.205285	0.601954	0.621162	0.637947	0.591109	0.617445	0.624064	0.632394	0.593399	0.730772	0.661454	0.601625	0.615824	0.624308	0.67465	0.692403
	17.1	0.120799	0.193724	0.421471	0.10416	0.385004	0.219864	0.156335	0.4186	0.248545	0.227039	0.224184	0.115513	0.242498	0.254149	0.205992	0.600681	0.620347	0.639286	0.589297	0.618492	0.625523	0.627614	0.590453	0.730939	0.659848	0.599719	0.61459	0.622919	0.672183	0.690586
	17.2	0.120886	0.193071	0.421194	0.104369	0.38357	0.220382	0.154911	0.416991	0.248122	0.225573	0.222611	0.11512	0.241373	0.254814	0.205047	0.598586	0.618558	0.636055	0.586847	0.618009	0.62069	0.628447	0.588505	0.728343	0.65775	0.598497	0.613029	0.623229	0.668877	0.689845
	17.3	0.120566	0.194026	0.424093	0.104194	0.382734	0.221985	0.155357	0.416375	0.249806	0.227359	0.22152	0.114915	0.241229	0.253774	0.206635	0.597895	0.614301	0.634019	0.586209	0.61377	0.621013	0.628192	0.585326	0.72931	0.658512	0.598254	0.61144	0.62285	0.667428	0.68857
	17.4	0.121211	0.1948	0.419771	0.10466	0.383373	0.219894	0.156282	0.415974	0.248548	0.22633	0.221743	0.114789	0.240101	0.254196	0.204778	0.596154	0.615629	0.633843	0.584025	0.613779	0.618619	0.625244	0.584836	0.725964	0.656535	0.595875	0.609875	0.619451	0.669128	0.688725
	17.5	0.121608	0.194773	0.424303	0.104363	0.38122	0.222107	0.157176	0.415951	0.247136	0.225551	0.221157	0.11454	0.240955	0.255392	0.204807	0.593759	0.616343	0.63564	0.581116	0.611755	0.617541	0.62424	0.585742	0.724284	0.654605	0.594603	0.609003	0.617806	0.670329	0.685508
	17.6	0.121075	0.195215	0.419745	0.104252	0.381252	0.22185	0.156383	0.412858	0.247812	0.226366	0.22106	0.114166	0.240796	0.255746	0.205639	0.59008	0.615838	0.632225	0.580135	0.611056	0.618849	0.623944	0.582128	0.723004	0.653356	0.592818	0.606881	0.621308	0.667919	0.684989
	17.7	0.12028	0.194792	0.420146	0.104362	0.38052	0.221197	0.157586	0.412959	0.24696	0.225594	0.220353	0.113621	0.240887	0.254666	0.204473	0.589546	0.612391	0.630628	0.579833	0.608895	0.614885	0.621179	0.581791	0.722671	0.650114	0.590331	0.605488	0.615623	0.668217	0.682614
	17.8	0.121347	0.195174	0.418101	0.104563	0.381448	0.221201	0.15697	0.411961	0.247843	0.225815	0.220084	0.113433	0.240727	0.254738	0.20514	0.587787	0.608423	0.6304	0.576555	0.608436	0.616832	0.621944	0.580524	0.719926	0.650791	0.589402	0.604655	0.614922	0.662999	0.682025
	17.9	0.120166	0.195118	0.42271	0.104336	0.380302	0.222403	0.157552	0.411684	0.248624	0.226039	0.220181	0.113503	0.242925	0.253976	0.204941	0.587336	0.609534	0.630569	0.575427	0.607305	0.614459	0.620123	0.579283	0.720801	0.650345	0.58732	0.60387	0.614885	0.664986	0.682495
	18	0.12041	0.196034	0.41888	0.103876	0.380629	0.2228	0.15801	0.411446	0.248605	0.226184	0.218971	0.113523	0.243434	0.256346	0.205487	0.587166	0.611542	0.627555	0.575993	0.604899	0.610938	0.619264	0.5768	0.719862	0.648501	0.587322	0.602063	0.611804	0.661066	0.677998
	18.1	0.120366	0.196015	0.418128	0.103994	0.37889	0.225505	0.157392	0.408524	0.247511	0.227048	0.21901	0.113175	0.243284	0.25511	0.205527	0.586442	0.605358	0.625259	0.574893	0.603884	0.610016	0.620885	0.575485	0.718503	0.646195	0.5844	0.600315	0.610028	0.656839	0.677749
	18.2	0.120287	0.197715	0.416617	0.103867	0.378744	0.224193	0.159603	0.407707	0.247653	0.227205	0.218511	0.112566	0.241148	0.255273	0.204974	0.584108	0.605593	0.626641	0.570831	0.602292	0.609918	0.618211	0.574252	0.719865	0.646149	0.582994	0.599041	0.612183	0.661759	0.67669
	18.3	0.120132	0.19704	0.41841	0.104449	0.378133	0.223958	0.159421	0.40731	0.247025	0.226861	0.21883	0.113023	0.243414	0.256841	0.205725	0.581115	0.605435	0.624455	0.571294	0.601671	0.607116	0.617122	0.572235	0.71518	0.646155	0.579257	0.597589	0.606293	0.658535	0.675769
	18.4	0.120545	0.198508	0.417383	0.104219	0.377489	0.223305	0.16056	0.406316	0.247267	0.226765	0.218117	0.113036	0.244927	0.25782	0.204775	0.578399	0.605025	0.622744	0.568897	0.599822	0.605417	0.615885	0.570637	0.714694	0.643083	0.580693	0.594888	0.613671	0.656383	0.67504
	18.5	0.120134	0.198602	0.417872	0.104634	0.378554	0.224712	0.159186	0.407273	0.247102	0.225684	0.217741	0.112937	0.243238	0.25713	0.206144	0.579233	0.600651	0.623293	0.567115	0.597522	0.604131	0.61543	0.570365	0.715541	0.642343	0.578028	0.593918	0.604842	0.655164	0.674579
	18.6	0.120777	0.198298	0.418176	0.104368	0.376515	0.226119	0.160064	0.405663	0.247087	0.227031	0.217806	0.112368	0.244575	0.258626	0.206407	0.575699	0.604146	0.621171	0.565919	0.59891	0.601289	0.610668	0.569497	0.715124	0.639137	0.576905	0.593027	0.603613	0.653633	0.67257
	18.7	0.120521	0.199048	0.414404	0.104548	0.377395	0.224773	0.159864	0.404446	0.248459	0.226702	0.217077	0.112294	0.24482	0.258416	0.206608	0.574137	0.599639	0.621335	0.564669	0.595757	0.606424	0.609181	0.567301	0.711896	0.641916	0.575729	0.592074	0.603407	0.65132	0.671151
	18.8	0.120553	0.198572	0.413843	0.104316	0.376584	0.225565	0.159768	0.403872	0.249766	0.226233	0.218033	0.112683	0.243489	0.257928	0.207124	0.574123	0.600136	0.618155	0.561961	0.594634	0.602526	0.605638	0.565308	0.71073	0.639606	0.576362	0.589636	0.605803	0.648039	0.670849
	18.9	0.120315	0.197841	0.414633	0.104884	0.375392	0.226546	0.160931	0.402906	0.247863	0.2271	0.218307	0.112286	0.243483	0.260042	0.206577	0.57319	0.597705	0.618538	0.561784	0.592097	0.597178	0.606458	0.565488	0.712715	0.636763	0.57512	0.588563	0.600301	0.653102	0.668504
	19	0.12033	0.199696	0.411981	0.104755	0.374959	0.226798	0.160899	0.403532	0.250335	0.228237	0.217191	0.111914	0.242596	0.259355	0.206283	0.571908	0.597927	0.619151	0.561542	0.593275	0.597408	0.602999	0.563605	0.705221	0.635265	0.571644	0.588136	0.599407	0.651435	0.669128
	19.1	0.12062	0.200136	0.413779	0.104814	0.373715	0.226759	0.16036	0.401741	0.248016	0.228263	0.217362	0.112295	0.244963	0.25972	0.208578	0.569791	0.595373	0.612481	0.557413	0.591368	0.59795	0.6027	0.560994	0.708656	0.637492	0.57086	0.58679	0.600167	0.647379	0.668861
	19.2	0.119962	0.200358	0.41387	0.104954	0.374179	0.226842	0.160123	0.40058	0.249499	0.227223	0.217138	0.112316	0.244047	0.260392	0.206614	0.569592	0.593996	0.614474	0.556214	0.589161	0.597581	0.6025	0.558617	0.707292	0.634808	0.56781	0.585068	0.59871	0.644844	0.668118
	19.3	0.121284	0.19867	0.413085	0.105631	0.37411	0.226437	0.16096	0.398626	0.248406	0.227788	0.215927	0.111791	0.245289	0.261805	0.208391	0.567847	0.591975	0.61131	0.555926	0.586563	0.593821	0.602401	0.557645	0.70628	0.631252	0.566102	0.583489	0.599626	0.647383	0.668335
	19.4	0.120535	0.200374	0.41405	0.105372	0.373718	0.226842	0.161979	0.399576	0.247911	0.227624	0.216598	0.112179	0.245328	0.262148	0.208428	0.567449	0.593709	0.615095	0.55352	0.587327	0.593125	0.601082	0.558118	0.70377	0.630586	0.564971	0.582645	0.595335	0.646963	0.668534
	19.5	0.120186	0.202088	0.412902	0.105735	0.373651	0.229137	0.161984	0.399243	0.248701	0.229073	0.216199	0.112544	0.24525	0.261079	0.208698	0.564401	0.592005	0.612387	0.55457	0.585982	0.595972	0.60233	0.556683	0.70202	0.629397	0.56584	0.580715	0.596045	0.64332	0.665821
	19.6	0.120881	0.201589	0.412253	0.106042	0.373686	0.226663	0.162899	0.397409	0.249025	0.228161	0.215195	0.111733	0.244083	0.262351	0.209044	0.562271	0.586706	0.6118	0.551234	0.584645	0.59108	0.594979	0.554557	0.702328	0.629699	0.562907	0.579389	0.592239	0.643388	0.664608
	19.7	0.120371	0.202468	0.409918	0.105917	0.37148	0.228937	0.16332	0.397087	0.249303	0.228724	0.216845	0.112172	0.244748	0.263185	0.208331	0.561664	0.588919	0.610876	0.55148	0.58345	0.587519	0.597637	0.553451	0.701419	0.628022	0.561687	0.578142	0.588755	0.645945	0.660398
	19.8	0.120439	0.201914	0.410101	0.106195	0.370604	0.228501	0.16252	0.39636	0.24917	0.230186	0.216043	0.111994	0.245824	0.262181	0.209064	0.559599	0.58886	0.605432	0.550615	0.581751	0.590912	0.594175	0.553017	0.701201	0.626309	0.557838	0.576296	0.590969	0.64025	0.659694
	19.9	0.120811	0.20191	0.411415	0.106376	0.371028	0.231546	0.162966	0.396021	0.248713	0.229308	0.214966	0.112376	0.246548	0.264327	0.208924	0.55856	0.584965	0.607289	0.548233	0.5794	0.59206	0.592488	0.549755	0.699314	0.626045	0.55898	0.576378	0.589915	0.64096	0.658263
