# Supplementary material for: Erasable labeling of neuronal activity using a reversible calcium marker
Source: eLife. 2020 Sep 15;9:e57249. doi: 10.7554/eLife.57249 (PMC7492087; doi:10.7554/eLife.57249)
Supplement: Figure 2—source data 3. — Previously stimulated neurons were stimulated (3 × 160 stims at 80 Hz) during 20 s marking light illumination. Previously non-stimulated neurons were not stimulated during 20 s marking light illumination. [file elife-57249-fig2-data3.xlsx]

## Sheet: Sheet1
Figure 2d	normalized fluorescence intensity (AU)
	Time (min)	previously stimulated
	0	0.195888	0.157622	0.190125	0.125715	0.262662	0.273362	0.132092	0.114113	0.278131	0.185477	0.209065	0.353824	0.554947	0.141763	0.22735	0.160967	0.434859	0.281131	0.132057	0.276718	0.229873	0.197269	0.178053	0.422603	0.200313	0.496749	0.443932	0.356263	0.139696	0.126986	0.212552	0.213001	0.191941	0.150876	0.105715	0.192294	0.171362	0.238945	0.617408	0.150717	0.24352	0.211846	0.283897	0.311406	0.129216	0.153329	0.522375	0.522949
	5	0.215269	0.176759	0.21267	0.143724	0.297059	0.277551	0.150161	0.135583	0.294984	0.210427	0.225627	0.348866	0.572267	0.169194	0.236223	0.187692	0.455085	0.274202	0.160738	0.300215	0.250483	0.214096	0.224669	0.431709	0.222164	0.496064	0.42138	0.384195	0.161378	0.520845	0.224869	0.243002	0.219748	0.168843	0.116556	0.207072	0.18557	0.255257	0.631174	0.168321	0.260617	0.231766	0.296199	0.315171	0.153039	0.169493	0.530338	0.526404
	10	0.230102	0.189917	0.232737	0.159561	0.319261	0.282997	0.165361	0.151576	0.308459	0.23054	0.241622	0.355189	0.574271	0.191507	0.245701	0.205591	0.461429	0.277587	0.186082	0.311429	0.271567	0.228279	0.248448	0.433547	0.237872	0.498114	0.416959	0.402664	0.172028	0.52865	0.239829	0.256436	0.24181	0.183998	0.128555	0.217411	0.196635	0.268971	0.643381	0.185538	0.280815	0.242617	0.306377	0.324222	0.17425	0.181514	0.531494	0.527478
	15	0.242338	0.202774	0.250091	0.173144	0.33505	0.290168	0.182221	0.167226	0.322883	0.247801	0.254104	0.36297	0.579308	0.209728	0.256558	0.222227	0.460873	0.281311	0.203607	0.322245	0.280245	0.241264	0.266069	0.426512	0.25419	0.499673	0.412971	0.414512	0.182007	0.538411	0.251189	0.266061	0.257874	0.199405	0.139591	0.229732	0.205083	0.279113	0.646552	0.201432	0.295951	0.253191	0.314464	0.331399	0.191772	0.195552	0.530695	0.531973
	20	0.25153	0.21551	0.262017	0.187786	0.349725	0.293708	0.195913	0.179214	0.335902	0.260299	0.264816	0.370102	0.570682	0.225632	0.264918	0.234495	0.465486	0.28537	0.218237	0.327517	0.290602	0.250546	0.278595	0.410036	0.267231	0.502754	0.412636	0.419665	0.189951	0.538304	0.259205	0.274401	0.271389	0.212844	0.150194	0.237182	0.214004	0.287055	0.65812	0.215017	0.310039	0.262428	0.323179	0.339437	0.20631	0.20569	0.534906	0.531712
	25	0.261359	0.231623	0.276166	0.200282	0.360883	0.302709	0.207988	0.192345	0.344537	0.274098	0.271821	0.37538	0.571554	0.240219	0.275501	0.246805	0.464112	0.290839	0.230158	0.338478	0.300428	0.262942	0.288425	0.398259	0.276216	0.507572	0.416057	0.423805	0.196949	0.543608	0.268167	0.279392	0.284524	0.224538	0.160394	0.245029	0.221053	0.296812	0.660259	0.226988	0.322828	0.26932	0.329934	0.342112	0.219652	0.214832	0.541807	0.541054
	30	0.270808	0.240452	0.28855	0.211781	0.371022	0.306965	0.221944	0.204467	0.349675	0.283833	0.276683	0.381788	0.568165	0.251472	0.282455	0.258063	0.467995	0.29592	0.242264	0.345924	0.305426	0.272741	0.297178	0.398648	0.285424	0.510997	0.418894	0.432224	0.204205	0.54688	0.276454	0.288252	0.293937	0.235031	0.168785	0.253261	0.230893	0.310992	0.664892	0.23829	0.332452	0.276184	0.335262	0.350716	0.232476	0.223554	0.548493	0.541281
	35	0.279424	0.251557	0.297403	0.223679	0.377406	0.310442	0.232171	0.212831	0.357725	0.292906	0.283812	0.387915	0.56822	0.262129	0.288985	0.263315	0.466805	0.299681	0.252574	0.348451	0.313398	0.282506	0.303892	0.396552	0.296987	0.510471	0.422201	0.437005	0.210319	0.550089	0.281757	0.292658	0.298852	0.244541	0.176982	0.260307	0.235805	0.318618	0.670231	0.248435	0.341119	0.285156	0.342207	0.35397	0.241956	0.231902	0.544866	0.543908
	40	0.287342	0.261574	0.308449	0.234374	0.384592	0.316334	0.2446	0.222845	0.364431	0.304064	0.287458	0.393667	0.571411	0.27029	0.298721	0.274243	0.469198	0.303366	0.261791	0.353917	0.320438	0.290509	0.309321	0.368375	0.305703	0.513394	0.423774	0.435472	0.21768	0.548645	0.290721	0.301428	0.309595	0.252287	0.18489	0.267532	0.247066	0.3305	0.671018	0.258088	0.352093	0.292043	0.347463	0.360915	0.251901	0.241605	0.552393	0.546303
	45	0.297325	0.273388	0.311236	0.243565	0.389121	0.318889	0.253033	0.229982	0.367911	0.310249	0.293677	0.39691	0.569574	0.280023	0.304885	0.281093	0.472753	0.309946	0.270004	0.362999	0.327706	0.300265	0.315013	0.381741	0.311123	0.518018	0.431626	0.439876	0.220168	0.553568	0.295548	0.305251	0.318962	0.26011	0.192661	0.269982	0.24823	0.338547	0.668048	0.266341	0.35942	0.296686	0.352001	0.364486	0.259803	0.2484	0.553906	0.546371
	50	0.300422	0.282042	0.320254	0.253502	0.391182	0.320889	0.26375	0.239339	0.375067	0.316145	0.29721	0.401159	0.571029	0.288092	0.309615	0.28813	0.476311	0.31293	0.275746	0.3643	0.33233	0.305255	0.319486	0.38127	0.317544	0.5187	0.42927	0.444501	0.227987	0.554402	0.298118	0.309566	0.323417	0.268345	0.200375	0.278352	0.255848	0.346263	0.668708	0.274371	0.36534	0.300782	0.35666	0.369729	0.268761	0.256665	0.552792	0.546939
	55	0.304592	0.29104	0.323298	0.261839	0.393419	0.325819	0.269821	0.2469	0.38048	0.324106	0.30135	0.403058	0.559002	0.294915	0.316141	0.294815	0.48022	0.316601	0.280355	0.372825	0.335683	0.314181	0.323419	0.381112	0.323811	0.519128	0.434307	0.450836	0.235086	0.555972	0.303211	0.316726	0.333155	0.274312	0.20583	0.282451	0.263065	0.352374	0.661625	0.281622	0.369693	0.306903	0.363752	0.37244	0.276495	0.263302	0.556976	0.551365
	60	0.312207	0.298194	0.327001	0.270185	0.396311	0.327296	0.27817	0.251959	0.38306	0.328654	0.305083	0.407459	0.564538	0.299707	0.319751	0.295964	0.476707	0.319328	0.285185	0.372726	0.342878	0.31985	0.326385	0.379407	0.325485	0.520608	0.435701	0.447709	0.238558	0.558041	0.306021	0.315884	0.338841	0.278965	0.21215	0.289256	0.267898	0.361853	0.663437	0.287298	0.37658	0.306703	0.365708	0.377241	0.281922	0.269651	0.55245	0.551038
	erased	0.961506	1.02556	0.862414	0.992824	0.928844	0.930138	0.980388	0.944202	0.971724	0.958069	0.89353	0.960374	0.91739	0.945001	0.938028	0.942945	0.934832	0.927822	0.905002	0.96087	0.958164	0.969656	0.943411	0.743104	0.950078	0.970814	0.913717	0.928902	0.91367	0.974662	0.941727	0.975769	0.938331	0.898044	0.963927	0.949372	0.937802	0.997461	0.988016	0.932052	0.984957	0.892081	0.936425	0.9365	0.923467	0.964085	0.981593	0.978528
[truncated: 77 more columns]
