# Supplementary material for: Erasable labeling of neuronal activity using a reversible calcium marker
Source: eLife. 2020 Sep 15;9:e57249. doi: 10.7554/eLife.57249 (PMC7492087; doi:10.7554/eLife.57249)
Supplement: Figure 2—source data 4. [file elife-57249-fig2-data4.xlsx]

## Sheet: Sheet1
Figure 2e	normalized fluorescence intensity (AU)
	cycle	pre-mark							post-mark with stimulation							post-mark without stimulation
	1	1	1	1	1	1	1	1	0.298516	0.17687	0.227862	0.277726	0.244332	0.133741	0.304129
	2	0.948722	0.926293	0.943615	0.946777	0.910628	0.706633	0.875297								0.754489	0.685373	0.672547	0.650052	0.664455	0.345572	0.652814
	3	0.943708	0.939021	0.945104	0.957253	0.923625	0.853564	0.918405	0.239345	0.120562	0.140444	0.192572	0.17107	0.111835	0.27744
	4	0.888501	0.839274	0.864016	0.881978	0.802301	0.596336	0.810557								0.704869	0.591531	0.566401	0.548063	0.54157	0.253829	0.569318
	5	0.893786	0.88501	0.901062	0.919476	0.870394	0.738677	0.873623	0.223751	0.115658	0.125399	0.156555	0.198562	0.10584	0.253636
	6	0.8332	0.77553	0.790147	0.826443	0.770575	0.533649	0.765033								0.656373	0.539326	0.495638	0.474724	0.500791	0.225803	0.511566
	7	0.841196	0.828266	0.854284	0.881406	0.828859	0.660016	0.827583	0.198629	0.120412	0.108302	0.145604	0.181445	0.105114	0.231189
	8	0.761006	0.720706	0.714826	0.784197	0.720553	0.482316	0.718673								0.593921	0.50159	0.417242	0.429116	0.457983	0.205291	0.457122
	9	0.784684	0.775244	0.802174	0.84521	0.787856	0.595016	0.797405	0.188914	0.12755	0.103327	0.124885	0.181092	0.105403	0.214045
	10	0.686879	0.671617	0.656471	0.729597	0.687408	0.447559	0.677352								0.530484	0.469733	0.361154	0.370877	0.416818	0.193987	0.39636
	11	0.727264	0.722998	0.753207	0.809846	0.753284	0.535404	0.753179	0.198043	0.132567	0.101377	0.11429	0.170187	0.105583	0.191594
	12	0.62803	0.625161	0.60007	0.677687	0.664376	0.415794	0.62885								0.486936	0.442148	0.322444	0.313336	0.401688	0.184226	0.349614
	13	0.671379	0.67441	0.701825	0.771106	0.721196	0.492401	0.71845	0.201632	0.140532	0.0999044	0.109193	0.143321	0.106933	0.182908
	14	0.576065	0.58128	0.55327	0.636872	0.605772	0.392539	0.597311								0.449277	0.413828	0.291349	0.29391	0.354018	0.180169	0.313889
	15	0.617741	0.631564	0.656096	0.734941	0.68245	0.452529	0.671668	0.2074	0.144241	0.1009	0.101295	0.207359	0.108764	0.171632
	16	0.536953	0.543774	0.513895	0.596785	0.624797	0.373499	0.557519								0.423559	0.381878	0.267645	0.262409	0.381082	0.17515	0.285172
	17	0.575915	0.587302	0.61317	0.699357	0.66622	0.426729	0.637645	0.211941	0.14315	0.100917	0.100608	0.236095	0.11186	0.170764
	18	0.502007	0.504721	0.473386	0.567358	0.620546	0.353042	0.531645								0.399352	0.365412	0.248116	0.244441	0.378366	0.167958	0.267159
	19	0.534412	0.551691	0.568172	0.665209	0.63865	0.39989	0.591993	0.205307	0.14362	0.102573	0.0911248	0.218623	0.116434	0.154578
	20	0.467533	0.476296	0.443657	0.517392	0.590874	0.338518	0.482038								0.373603	0.351986	0.232795	0.20223	0.330744	0.166228	0.231649
