# Supplementary material for: Erasable labeling of neuronal activity using a reversible calcium marker
Source: eLife. 2020 Sep 15;9:e57249. doi: 10.7554/eLife.57249 (PMC7492087; doi:10.7554/eLife.57249)
Supplement: Figure 2—source data 5. [file elife-57249-fig2-data5.xlsx]

## Sheet: Sheet1
Figure 2g	ΔF/F
	non-patched	patched
	0.26065	0.775847		Cycle 1
	0.193673	0.573651		Cycle 2
	0.241927	0.80595		Cycle 3
	0.248447	0.769107
	0.230304	0.608092
	0.223356	0.814891
	0.257351	0.736289
	0.224968	0.626851
	0.271	0.772736
	0.222638
	0.239592
	0.233107
	0.21674
	0.208759
	0.273612
	0.262052
	0.281123
	0.249586
	0.256223
	0.262778
	0.224076
	0.222814
	0.265204
	0.238682
