# Supplementary material for: Erasable labeling of neuronal activity using a reversible calcium marker
Source: eLife. 2020 Sep 15;9:e57249. doi: 10.7554/eLife.57249 (PMC7492087; doi:10.7554/eLife.57249)
Supplement: Figure 2—source data 6. — The patched cell was stimulated to fire action potentials using current injection as described in Materials and methods. [file elife-57249-fig2-data6.xlsx]

## Sheet: Sheet1
Figure 2h	normalized fluorescence intensity (AU)
	Time (s)	current injection	non-patched
	0.1	1	1	1	1	1
	0.2	0.987236	0.993122	0.997551	1.00113	0.999796
	0.3	1.00097	0.985682	0.981473	0.999636	1.00194
	0.4	0.981733	0.975078	0.980252	0.998529	0.988856
	0.5	0.979195	0.974833	0.995285	0.976989	1.00365
	0.6	0.982405	0.975723	0.983552	0.975464	0.987521
	0.7	0.981619	0.973982	0.979071	0.986622	0.977481
	0.8	0.967703	0.964976	0.973798	0.981466	0.993641
	0.9	0.975537	0.96947	1.00805	0.986501	0.986643
	1	0.971792	0.972042	1.0058	0.978965	0.982017
	1.1	0.968282	1.00035	0.977468	0.992804	0.982708
	1.2	0.957778	0.965022	0.962341	0.97004	0.977052
	1.3	0.960764	0.95715	0.964532	0.973954	0.971631
	1.4	0.958313	0.948751	0.988884	0.963286	0.970683
	1.5	0.939981	0.961663	0.973269	0.972211	0.968494
	1.6	0.926873	0.969005	0.963328	0.964165	0.973097
	1.7	0.90735	0.95639	0.980122	0.961698	0.954758
	1.8	0.894095	0.955706	0.965512	0.957789	0.956448
	1.9	0.858757	0.961399	1.0038	0.957333	0.95694
	2	0.832553	0.948667	0.981479	0.957352	0.949404
	2.1	0.815143	0.94935	0.972424	0.955643	0.957763
	2.2	0.785259	0.946668	0.943996	0.942795	0.949138
	2.3	0.758465	0.938701	0.948847	0.942897	0.955411
	2.4	0.743173	0.935909	0.954801	0.944853	0.947377
	2.5	0.72988	0.941427	0.97405	0.941998	0.951171
	2.6	0.722171	0.932061	0.927102	0.946412	0.948593
	2.7	0.721805	0.933705	0.934389	0.938725	0.94007
	2.8	0.698756	0.929695	0.946151	0.953623	0.941517
	2.9	0.696584	0.934253	0.927536	0.936434	0.942769
	3	0.685982	0.936805	0.914194	0.934821	0.924685
	3.1	0.674943	0.920277	0.942094	0.933617	0.926775
	3.2	0.673775	0.917324	0.961578	0.929436	0.920423
	3.3	0.670412	0.918085	0.918511	0.923794	0.917939
	3.4	0.665176	0.923532	0.915915	0.929684	0.927231
	3.5	0.655841	0.925962	0.946051	0.93555	0.91763
	3.6	0.655246	0.915758	0.932792	0.920686	0.922396
	3.7	0.645004	0.923726	0.954795	0.933204	0.915165
	3.8	0.643083	0.924647	0.919703	0.928893	0.921553
	3.9	0.637416	0.913166	0.958771	0.936351	0.920289
	4	0.634828	0.907829	0.917641	0.924464	0.920224
	4.1	0.645425	0.919194	0.940866	0.918754	0.91655
	4.2	0.627289	0.909118	0.929286	0.937594	0.911772
	4.3	0.626454	0.90233	0.919104	0.912131	0.912242
	4.4	0.620148	0.901247	0.91433	0.922294	0.911537
	4.5	0.614389	0.887638	0.89491	0.927664	0.903603
	4.6	0.607668	0.903007	0.922404	0.908377	0.896834
	4.7	0.606314	0.899861	0.911188	0.921677	0.907405
	4.8	0.60924	0.887361	0.921271	0.90524	0.900829
	4.9	0.612254	0.884518	0.964073	0.905643	0.898341
	5	0.598016	0.888831	0.902338	0.903837	0.890235
	5.1	0.59503	0.890894	0.927748	0.90727	0.902888
	5.2	0.594741	0.890629	0.912826	0.906974	0.899414
	5.3	0.589713	0.906223	0.906484	0.904211	0.895272
	5.4	0.587676	0.890133	0.891375	0.908329	0.89458
	5.5	0.584008	0.890623	0.90491	0.899831	0.901427
	5.6	0.567854	0.878762	0.900894	0.908727	0.897059
	5.7	0.552262	0.880328	0.88572	0.902609	0.892733
	5.8	0.538155	0.881385	0.91083	0.893892	0.894077
	5.9	0.522732	0.889701	0.899514	0.891003	0.88209
	6	0.502981	0.872521	0.902673	0.897063	0.886738
	6.1	0.487564	0.874977	0.892326	0.886997	0.879995
	6.2	0.480898	0.869189	0.893794	0.882996	0.881821
	6.3	0.45376	0.860157	0.877111	0.880321	0.879789
	6.4	0.448459	0.867757	0.897083	0.872411	0.875066
	6.5	0.440778	0.875035	0.879806	0.886842	0.877065
	6.6	0.436039	0.876086	0.869184	0.874251	0.870298
	6.7	0.424547	0.870233	0.878291	0.875654	0.868436
	6.8	0.424574	0.876383	0.911957	0.871124	0.874941
	6.9	0.420382	0.858726	0.902015	0.872454	0.869019
	7	0.41269	0.856824	0.882619	0.873382	0.862062
	7.1	0.40877	0.860402	0.88192	0.859582	0.857591
	7.2	0.399238	0.855819	0.877769	0.864972	0.860317
	7.3	0.401132	0.847045	0.877017	0.866258	0.865314
	7.4	0.397982	0.853375	0.865725	0.865486	0.86343
	7.5	0.394052	0.850436	0.88192	0.860616	0.852614
	7.6	0.388374	0.844415	0.869242	0.859766	0.848194
	7.7	0.396186	0.847819	0.873858	0.85358	0.852996
	7.8	0.385137	0.844776	0.87286	0.861082	0.850315
	7.9	0.38334	0.839019	0.870288	0.866317	0.852297
	8	0.376178	0.847032	0.859952	0.859922	0.85451
	8.1	0.378471	0.847574	0.863887	0.846904	0.843625
	8.2	0.375222	0.846168	0.851396	0.852575	0.852876
	8.3	0.3746	0.834429	0.85546	0.853541	0.848307
	8.4	0.36842	0.836847	0.851126	0.854755	0.84513
	8.5	0.366258	0.82572	0.878327	0.848559	0.851191
	8.6	0.359522	0.829698	0.851649	0.858023	0.849996
	8.7	0.357136	0.83597	0.848278	0.839333	0.834655
	8.8	0.361574	0.840237	0.874187	0.83862	0.835051
	8.9	0.358342	0.826242	0.853276	0.837493	0.838864
	9	0.362475	0.820602	0.847773	0.835473	0.830275
	9.1	0.351857	0.818519	0.853099	0.844223	0.834736
	9.2	0.351447	0.824108	0.847879	0.833477	0.831674
	9.3	0.364146	0.828859	0.829557	0.831239	0.825733
	9.4	0.35463	0.814542	0.839605	0.841285	0.836649
	9.5	0.344732	0.811763	0.830591	0.826704	0.824902
	9.6	0.339863	0.838491	0.862219	0.833322	0.826947
	9.7	0.333885	0.820466	0.834273	0.829433	0.821555
	9.8	0.329938	0.805433	0.840803	0.83624	0.826625
	9.9	0.320968	0.816598	0.832635	0.832098	0.82341
	10	0.312659	0.814084	0.84822	0.833541	0.815918
	10.1	0.298356	0.816482	0.850774	0.830588	0.813537
	10.2	0.298825	0.814832	0.837409	0.826621	0.826697
	10.3	0.286454	0.814226	0.842013	0.821056	0.815162
	10.4	0.283195	0.810158	0.836774	0.826043	0.819755
	10.5	0.282158	0.810184	0.836915	0.818357	0.813609
	10.6	0.277643	0.803957	0.823004	0.829457	0.808651
	10.7	0.270633	0.806806	0.817854	0.821629	0.813206
	10.8	0.271032	0.812015	0.815282	0.823596	0.805325
	10.9	0.267685	0.791477	0.830732	0.820649	0.807531
	11	0.265846	0.806929	0.826099	0.811355	0.813451
	11.1	0.266326	0.80397	0.807202	0.818556	0.80653
	11.2	0.261194	0.805556	0.835077	0.813515	0.807034
	11.3	0.254894	0.797465	0.81658	0.809995	0.812474
	11.4	0.256385	0.795673	0.82685	0.815035	0.798241
	11.5	0.254239	0.789684	0.82281	0.811092	0.800672
	11.6	0.249877	0.78708	0.812786	0.797404	0.80958
	11.7	0.25169	0.786126	0.818112	0.810869	0.801217
	11.8	0.251553	0.784663	0.808981	0.80965	0.80084
	11.9	0.250767	0.787841	0.796872	0.796462	0.791184
	12	0.245597	0.784166	0.817038	0.800536	0.806652
	12.1	0.246252	0.787396	0.807536	0.798045	0.799919
	12.2	0.247033	0.777855	0.813679	0.801051	0.784635
	12.3	0.248425	0.773633	0.798117	0.797132	0.786704
	12.4	0.240116	0.774716	0.798546	0.79046	0.785456
	12.5	0.240411	0.771086	0.814824	0.796355	0.787611
	12.6	0.237998	0.764163	0.794112	0.787042	0.784988
	12.7	0.236884	0.771602	0.789233	0.796414	0.784688
	12.8	0.23577	0.770319	0.800184	0.790329	0.780512
	12.9	0.236557	0.762416	0.801541	0.775	0.781727
	13	0.235394	0.767908	0.802868	0.792412	0.77303
	13.1	0.237315	0.758432	0.811324	0.78339	0.774038
	13.2	0.233199	0.765065	0.799809	0.776976	0.768936
	13.3	0.234455	0.749923	0.78514	0.780676	0.771732
	13.4	0.23012	0.752572	0.786473	0.785639	0.765135
	13.5	0.23107	0.761301	0.781522	0.777632	0.769337
	13.6	0.230087	0.757446	0.772191	0.76709	0.766892
	13.7	0.232407	0.751444	0.792186	0.770945	0.767283
	13.8	0.233412	0.75811	0.78965	0.774592	0.754855
	13.9	0.227532	0.747376	0.780577	0.770945	0.756263
	14	0.225425	0.756562	0.762021	0.769892	0.766292
	14.1	0.226064	0.752727	0.788011	0.778287	0.76616
	14.2	0.225283	0.749188	0.780753	0.763681	0.766152
	14.3	0.225207	0.747608	0.775333	0.763181	0.762049
	14.4	0.223187	0.743438	0.781047	0.773276	0.767295
	14.5	0.229181	0.745732	0.783419	0.764706	0.754946
	14.6	0.237463	0.750567	0.778439	0.757495	0.762049
	14.7	0.225676	0.748298	0.760711	0.773621	0.756969
	14.8	0.229863	0.74521	0.770782	0.756995	0.756578
	14.9	0.226178	0.750651	0.7498	0.756548	0.759354
	15	0.224153	0.73935	0.806327	0.758073	0.751553
	15.1	0.228712	0.74416	0.766436	0.756572	0.74993
	15.2	0.225354	0.738132	0.763295	0.759486	0.760122
	15.3	0.22447	0.726058	0.79403	0.743933	0.753662
	15.4	0.221325	0.729681	0.763113	0.761243	0.745793
	15.5	0.225409	0.734516	0.777059	0.756873	0.754024
	15.6	0.225867	0.750425	0.77622	0.767211	0.752796
	15.7	0.219802	0.736604	0.764152	0.751935	0.753856
	15.8	0.225867	0.733684	0.764076	0.756752	0.744334
	15.9	0.226222	0.748395	0.779297	0.753416	0.748263
	16	0.221805	0.73518	0.770212	0.746569	0.74586
	16.1	0.222532	0.742587	0.761809	0.7442	0.748207
	16.2	0.222493	0.741168	0.762255	0.748725	0.748752
	16.3	0.223754	0.722196	0.771146	0.742423	0.736046
	16.4	0.220533	0.735192	0.778792	0.745001	0.739907
	16.5	0.220746	0.721171	0.771263	0.747987	0.730718
	16.6	0.218808	0.723737	0.766055	0.738616	0.735419
	16.7	0.21835	0.717175	0.756782	0.731031	0.724849
	16.8	0.215342	0.720134	0.743723	0.724267	0.724517
	16.9	0.221036	0.713461	0.751051	0.739936	0.732568
	17	0.224027	0.711876	0.750769	0.733381	0.730162
	17.1	0.215194	0.722538	0.741773	0.734323	0.718662
	17.2	0.217329	0.71049	0.74051	0.729424	0.719648
	17.3	0.221434	0.710013	0.758198	0.734289	0.725811
	17.4	0.219354	0.710129	0.742536	0.731973	0.720433
	17.5	0.219884	0.712694	0.729829	0.735678	0.71608
	17.6	0.217138	0.709168	0.731485	0.734673	0.725897
	17.7	0.211498	0.704501	0.740305	0.729341	0.717817
	17.8	0.215189	0.712785	0.741209	0.728477	0.720738
	17.9	0.218868	0.705887	0.751216	0.721222	0.717611
	18	0.218333	0.707795	0.752437	0.723553	0.718801
	18.1	0.215888	0.704056	0.745631	0.714939	0.712015
	18.2	0.216313	0.697281	0.738391	0.718795	0.706673
	18.3	0.217171	0.692053	0.73078	0.715391	0.701291
	18.4	0.21574	0.694116	0.733311	0.715323	0.718014
	18.5	0.213311	0.69643	0.734685	0.718042	0.710808
	18.6	0.210292	0.689378	0.730962	0.71609	0.704965
	18.7	0.218836	0.705339	0.712347	0.713657	0.70442
	18.8	0.215571	0.693497	0.720416	0.712186	0.701667
	18.9	0.216106	0.686838	0.728772	0.704757	0.701084
	19	0.214643	0.697758	0.706674	0.715668	0.696626
	19.1	0.213982	0.697345	0.71661	0.706913	0.704696
	19.2	0.215031	0.686393	0.718219	0.705378	0.703014
	19.3	0.213731	0.683698	0.751638	0.714823	0.704662
	19.4	0.217716	0.681236	0.701254	0.698915	0.692328
	19.5	0.220457	0.681326	0.720046	0.699333	0.689326
	19.6	0.212372	0.675008	0.714995	0.696351	0.682482
	19.7	0.211411	0.662315	0.699499	0.694453	0.687396
	19.8	0.214173	0.671089	0.703985	0.710758	0.685988
	19.9	0.211029	0.680153	0.721026	0.686587	0.679117
	20	0.209184	0.676549	0.693121	0.691127	0.681759
