# Supplementary material for: Erasable labeling of neuronal activity using a reversible calcium marker
Source: eLife. 2020 Sep 15;9:e57249. doi: 10.7554/eLife.57249 (PMC7492087; doi:10.7554/eLife.57249)
Supplement: Figure 2—source data 7. [file elife-57249-fig2-data7.xlsx]

## Sheet: Sheet1
Figure 2j	pre-marked fluorescence to post-marked fluorescence ratio
	-channelrhodopsin	+channelrhodopsin
	0.476022	0.753725		Cycle 1
	0.313471	0.448147		Cycle 2
	0.281194	0.640037		Cycle 3
	0.266365	0.660734
	0.322024	0.545742
	0.319137	0.801512
	0.295846	0.409124
	0.282247	0.816831
	0.281003	0.713598
	0.25519	0.703926
	0.279167	0.678466
	0.296999	0.641927
	0.326828	0.779067
	0.315568	0.748355
	0.276393	0.551239
	0.312717	0.646915
	0.285219	0.610316
	0.212906	0.638717
	0.33361	0.845213
	0.245597	0.316293
	0.329613	0.693553
	0.240575	0.797788
	0.30365	0.869317
	0.23579	0.747402
	0.286191	0.781913
	0.287348	0.793287
	0.284385	0.843941
	0.26486	0.648574
	0.282937	0.676125
	0.254644	0.820362
	0.27406	0.405278
	0.281373	0.518236
	0.247417	0.711426
	0.278869	0.595412
	0.299149	0.298747
	0.294221	0.306584
	0.315205	0.316338
	0.309551	0.764878
	0.279728	0.699874
	0.319772	0.386908
	0.251739	0.872645
	0.281902	0.887513
	0.243078	0.695876
	0.636837	0.484515
	0.27811	0.633387
	0.303204	0.658775
	0.328934	0.606337
	0.291837	0.806478
	0.295793	0.379534
	0.316388	0.82192
	0.303177	0.725541
	0.295574	0.68493
	0.303737	0.728827
	0.317351	0.668248
	0.319368	0.778202
	0.261505	0.729096
	0.222655	0.565217
	0.275965	0.642351
	0.288476	0.60456
	0.280146	0.638966
	0.265638	0.841162
	0.325809	0.321832
	0.24676	0.677959
	0.317231	0.815044
	0.252876	0.844161
	0.297789	0.733358
	0.302131	0.724384
	0.443252	0.835003
	0.30078	0.84582
	0.232453	0.645771
	0.258012	0.694482
	0.300428	0.787302
	0.220294	0.369061
	0.271274	0.580288
	0.260638	0.666413
	0.298038	0.5818
	0.28739	0.296777
	0.308399	0.31696
	0.313427	0.316323
	0.455017	0.743406
	0.322512	0.633409
	0.284094	0.453509
	0.275344	0.872663
	0.326262	0.884182
	0.320526	0.701152
	0.29732	0.500037
	0.28214	0.626439
	0.286964	0.648766
	0.253105	0.608344
	0.283984	0.799736
	0.295252	0.39784
	0.318977	0.805151
	0.324881	0.724582
	0.275829	0.668922
	0.316645	0.735629
	0.281235	0.677609
	0.196749	0.783977
	0.342196	0.726793
	0.247015	0.5631
	0.337776	0.632006
	0.241152	0.606233
	0.30856	0.647116
	0.234499	0.849575
	0.294558	0.315968
	0.28198	0.667506
	0.291513	0.821295
	0.260271	0.841705
	0.278389	0.732231
	0.254476	0.696301
	0.270837	0.844689
	0.278647	0.8393
	0.262379	0.617898
	0.273988	0.691303
	0.300376	0.770429
	0.303783	0.343515
	0.322494	0.575388
	0.311999	0.658289
	0.286251	0.564516
	0.319616	0.304797
	0.256848	0.308501
	0.288928	0.325216
	0.250847	0.739175
	0.72164	0.573699
	0.283733	0.500832
	0.30872	0.875338
	0.327712	0.884512
	0.282611
	0.30166
	0.321208
	0.307928
	0.305749
	0.309974
	0.312134
	0.320761
	0.26474
	0.225849
	0.290033
	0.287778
	0.279232
	0.270298
	0.328189
	0.251624
	0.318344
	0.264557
	0.300582
	0.290469
	0.46119
	0.301308
	0.239569
	0.261241
	0.302314
	0.215567
	0.27656
	0.266523
	0.300215
	0.283689
	0.315148
	0.320731
	0.431204
	0.316514
	0.285253
	0.279502
	0.319912
	0.31593
	0.304978
	0.290355
	0.289558
	0.26302
	0.289873
	0.310241
	0.325626
	0.321864
	0.26709
	0.318079
	0.280912
	0.202093
	0.340726
	0.246742
	0.335248
	0.252786
	0.322076
	0.246655
	0.296288
	0.290174
	0.284003
	0.258104
	0.289189
	0.262482
	0.264805
	0.273054
	0.259297
	0.274348
	0.295999
	0.298778
	0.319247
	0.313131
	0.282176
	0.318334
	0.244562
	0.291409
	0.248686
	0.71682
	0.285085
	0.304237
	0.336932
	0.287921
	0.294896
	0.326769
	0.312511
	0.302352
	0.306261
	0.331573
	0.322623
	0.259502
	0.238977
	0.277679
	0.289575
	0.285418
	0.26936
	0.327569
	0.25453
	0.31816
	0.270826
	0.303126
	0.297112
	0.471668
	0.303396
	0.231411
	0.263466
	0.302285
	0.216716
	0.266371
	0.260023
	0.303962
	0.289104
	0.310009
	0.322926
