# Supplementary material for: Erasable labeling of neuronal activity using a reversible calcium marker
Source: eLife. 2020 Sep 15;9:e57249. doi: 10.7554/eLife.57249 (PMC7492087; doi:10.7554/eLife.57249)
Supplement: Figure 3—figure supplement 3—source data 1. [file elife-57249-fig3-figsupp3-data1.xlsx]

## Sheet: Sheet1
Figure 3 - figure supplement 3	mean correlation
		Cycle 1, cold	Cycle 2, warm	Cycle 3, cold	Cycle 4, warm	Cycle 5, cold	Cycle 6, warm
	Cycle 1, cold	1	0.297384	0.607508	0.297698	0.553403	0.323786
	Cycle 2, warm	0.297384	1	0.333809	0.88166	0.212028	0.794056
	Cycle 3, cold	0.607508	0.333809	1	0.335863	0.502779	0.360246
	Cycle 4, warm	0.297698	0.88166	0.335863	1	0.214091	0.785894
	Cycle 5, cold	0.553403	0.212028	0.502779	0.214091	1	0.245581
	Cycle 6, warm	0.323786	0.794056	0.360246	0.785894	0.245581	1
