# Supplementary material for: Erasable labeling of neuronal activity using a reversible calcium marker
Source: eLife. 2020 Sep 15;9:e57249. doi: 10.7554/eLife.57249 (PMC7492087; doi:10.7554/eLife.57249)
Supplement: Figure 3—source data 1. [file elife-57249-fig3-data1.xlsx]

## Sheet: Sheet1
Figure 3d	mean correlation
		Cycle 1, cold	Cycle 2, warm	Cycle 3, cold	Cycle 4, warm	Cycle 5, cold	Cycle 6, warm
	Cycle 1, cold	1	0.47	0.74	0.44	0.75	0.42
	Cycle 2, warm	0.47	1	0.44	0.82	0.39	0.82
	Cycle 3, cold	0.74	0.44	1	0.43	0.71	0.42
	Cycle 4, warm	0.44	0.82	0.43	1	0.38	0.92
	Cycle 5, cold	0.75	0.39	0.71	0.38	1	0.37
	Cycle 6, warm	0.42	0.82	0.42	0.92	0.37	1
